# Supplementary material for: Iron- and base-catalyzed C(α)-alkylation and one-pot sequential alkylation–hydroxylation of oxindoles with secondary alcohols
Source: Royal Society of Chemistry journal article supplement (doi:10.1039/d4ob00957f), 2024-01-01
Supplement: d4ob00957f1.pdf [file d4ob00957f1.pdf]

## Iron and Base Catalyzed C( $\alpha$ )-Alkylation and One-pot Sequential Alkylation-Hydroxylation of Oxindoles with Secondary Alcohols

Ratnakar Saha, Bhairab Chand Hembram, Surajit Panda, Narayan Ch. Jana and Bidraha Bagh\*

School of Chemical Sciences, National Institute of Science Education and Research (NISER), An OCC of Homi Bhabha National Institute, Bhubaneswar, PO Bhipur-Padanpur, Via Jatni, District Khurda, Odisha, PIN 752050, India

E-mail: [bidraha@niser.ac.in](mailto:bidraha@niser.ac.in)

### Table of Contents

|                                                                                                                         |     |
|-------------------------------------------------------------------------------------------------------------------------|-----|
| General experimental                                                                                                    | S2  |
| General experimental procedure for the C( $\alpha$ )-alkylation of oxindole                                             | S3  |
| General condition for gram scale synthesis of <b>P</b> <sub>1</sub>                                                     | S5  |
| General condition for one-pot alkylation-hydroxylation of oxindole                                                      | S6  |
| General condition for gram scale synthesis of <b>P</b> <sub>30</sub>                                                    | S6  |
| Preparative scale for the determination of Green Metrics (CHEM21 green metrics toolkit, <i>E</i> -factor and Eco scale) | S7  |
| NMR data of products and <sup>1</sup> H and <sup>13</sup> C NMR spectrum                                                | S14 |
| Mechanistic studies for C( $\alpha$ )-alkylation of oxindole                                                            | S73 |
| Mechanistic studies for C( $\alpha$ )-alkylation and C-H hydroxylation of oxindole                                      | S77 |
| X-ray structure determination                                                                                           | S80 |
| Zero Pass for method A-D using CHEM21 green metrics toolkit                                                             | S82 |
| First Pass for method A-D using CHEM21 green metrics toolkit                                                            | S86 |
| References                                                                                                              | S94 |

## General experimental

All catalytic C( $\alpha$ )-alkylation of oxindole were performed under dry nitrogen atmosphere using standard Schlenk or glovebox (MBraun) techniques. Catalytic  $\alpha$ -alkylation of oxindole were performed in Ace pressure tubes purchased from Sigma-Aldrich. Catalytic C-H hydroxylation of  $\alpha$ -alkylated oxindole were performed in air. Analysis and purification of the products of alkylations and hydroxylation were carried out in air. Solvents were purchased from Merck and Spectrochem. For the air-sensitive experiments, solvents (1,4 dioxane, toluene, *p*-xylene, *t*AmOH and benzene) were distilled, degassed and stored over 3 Å molecular sieves. Deuterated solvents (CDCl<sub>3</sub> and DMSO-*d*<sub>6</sub>) were purchased from Sigma-Aldrich. TLC was performed on Merck Kiesel gel 60, F254 plates with the layer thickness of 0.25 mm. Column chromatography was performed using silica gel (100-200 mesh) as stationary phase. FeCl<sub>2</sub>, 1,10-phenanthroline, NaOtBu, butylated hydroxytoluene (BHT), TEMPO, anisole(dry), all oxindole substrate and all secondary alcohols were purchased from Sigma Aldrich, Alfa Aesar and TCI Chemicals and used without further purification.

<sup>1</sup>H and <sup>13</sup>C{<sup>1</sup>H} NMR spectra were recorded at Bruker AV-400 and JEOL-400 (<sup>1</sup>H at 400 MHz and <sup>13</sup>C at 101 MHz). <sup>1</sup>H and <sup>13</sup>C{<sup>1</sup>H} NMR chemical shifts are referenced in parts per million (ppm) with respect to residual solvent peaks (CDCl<sub>3</sub>:  $\delta$  7.26 and 77.16 ppm; DMSO-*d*<sub>6</sub>: 2.50 and 39.52 ppm). The coupling constants (*J*) are reported in hertz (Hz). The following abbreviations are used to describe multiplicity: s = singlet, brs = broad siglet, d = doublet, t = triplet, q = quadtrate, m = multiplate. GC was recorded using Shimadzu GC-2010 instrument. High resolution mass spectra (HRMS) were recorded on a Bruker micrOTOF-Q II Spectrometer. Gas chromatography (Thermo Scientific Trace 1110 GC) with a 60/80 Carboxen-1000 column, which was equipped with a thermal conductivity detector (TCD) was used to quantify gaseous products and high-purity Ar (99.999%) was used as carrier gas.

## General experimental procedure for the C( $\alpha$ )-alkylation of oxindole:

### General condition for reaction optimization:

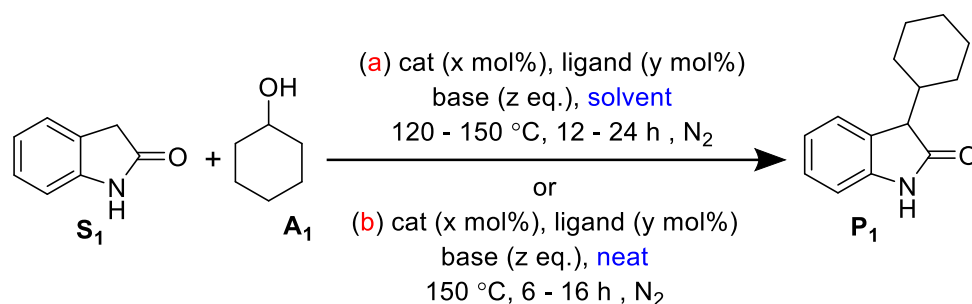

**Procedure A:** In a 15 mL dried pressure tube fitted with a magnetic stir bar, an appropriate amount of 2-oxindole (**S**<sub>1</sub>) (0.04 g, 0.30 mmol), cyclohexanol (**A**<sub>1</sub>) (0.06 g, 0.6 mmol), FeCl<sub>2</sub> (3 to 5 mol%), ligand (6 to 10 mol%), base (1 to 2 equivalent) and solvent (1 mL) were added successively under a nitrogen atmosphere. The reaction mixture was heated at an appropriate temperature in a preheated oil bath for the appropriate time. Thereafter the reaction mixture was cooled down to r.t. *n*-dodecane (0.051 g, 0.3 mmol) was added to the resultant mixture, and the product mixture was analyzed by GC. Occasionally the crude product was purified by column chromatography using silica as stationary phase and hexane as eluent.

**Procedure B:** In a 15 mL dried pressure tube fitted with a magnetic stir bar, an appropriate amount of 2-oxindole (**S**<sub>1</sub>) (0.04 g, 0.30 mmol), cyclohexanol (**A**<sub>1</sub>) (0.09 g, 0.9 mmol), FeCl<sub>2</sub> (5 mol%), ligand (10 mol%) and NaOtBu (1.5 equivalent) were added successively under a nitrogen atmosphere in absence of any added solvent. The reaction mixture was heated at 150 °C temperature in a preheated oil bath for the appropriate time. Thereafter the reaction mixture was cooled down to r.t. *n*-dodecane (0.051 g, 0.3 mmol) was added to the resultant mixture, and the product mixture was analyzed by GC. Occasionally the crude product was purified by column chromatography using silica as stationary phase and hexane as eluent.

### General condition for substrate screening:

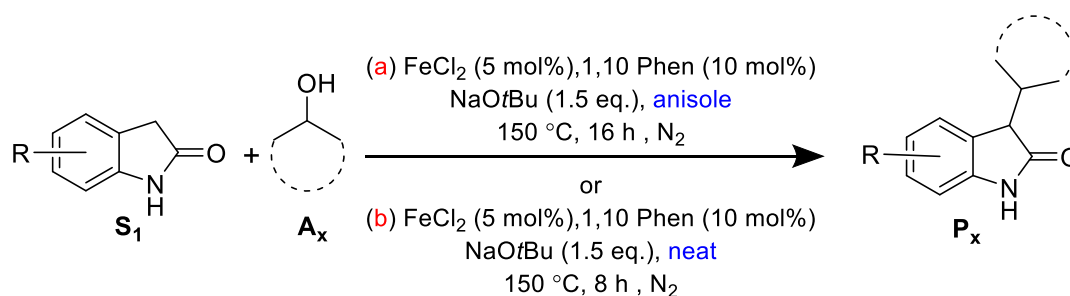

**Procedure A:** In a 15 mL dried pressure tube fitted with a magnetic stir bar, a mixture of 2-oxindole ( $S_1$ ) (0.3 mmol), secondary alcohols ( $A_x$ ) (0.6 mmol),  $FeCl_2$  (0.020 g, 5 mol%), 1,10-phenanthroline (0.054 g, 10 mol%), NaOtBu (0.45 mmol, 1.5 eq.), and anisole (1 mL) were successively added under a nitrogen atmosphere. Then the reaction mixture was heated at 150 °C in a preheated oil bath for 16 h. Thereafter, the reaction mixture was cooled down to r.t, and the crude product was purified by column chromatography (silica as stationary phase and a mixture of hexanes and ethyl acetate as eluent) to give a pure product.

**Procedure B:** In a 15 mL dried pressure tube fitted with a magnetic stir bar, a mixture of 2-oxindole ( $S_1$ ) (0.3 mmol), secondary alcohols ( $A_x$ ) (0.9 mmol),  $FeCl_2$  (0.020 g, 5 mol%), 1,10-phenanthroline (0.054 g, 10 mol%) and NaOtBu (0.45 mmol, 1.5 eq.) were successively added under a nitrogen atmosphere in absence of any added solvent. Then the reaction mixture was heated at 150 °C in a preheated oil bath for 8 h. Thereafter, the reaction mixture was cooled down to r.t, and the crude product was purified by column chromatography (silica as stationary phase and a mixture of hexanes and ethyl acetate as eluent) to give a pure product.

### General condition for gram scale synthesis of 3-cyclohexylindolin-2-one (P<sub>1</sub>):

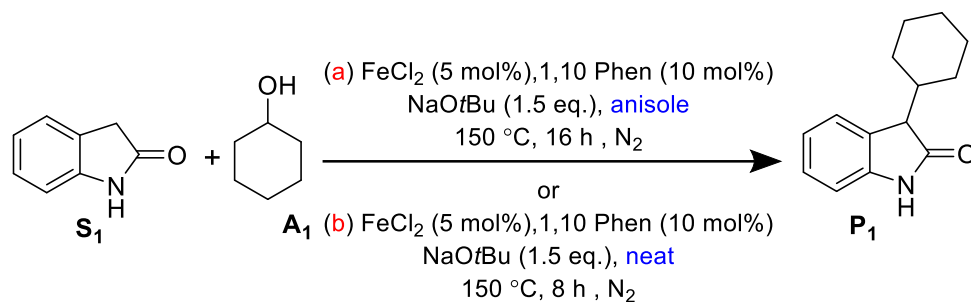

**Procedure A:** In a 50 mL dried pressure tube fitted with a magnetic stir bar, a mixture of 2-oxindole (1.065 g, 10.0 mmol), cyclohexanol (2.003 g, 20 mmol), FeCl<sub>2</sub> (0.063 g, 5 mol%), 1,10-phenanthroline (0.180 g, 10 mol%), NaOtBu (1.440 g, 15 mmol) and anisole (10 mL) were added successively under a nitrogen atmosphere. The reaction mixture was heated at 150 °C in a preheated oil bath for 16 h. Thereafter, the reaction mixture was cooled down to r.t. and the crude product was purified by column chromatography (hexane/EtOAc 8.5:1.5 as eluent) to give a white solid as pure product (2.002 g, 93%).

**Procedure B:** In a 50 mL dried pressure tube fitted with a magnetic stir bar, a mixture of 2-oxindole (1.065 g, 10.0 mmol), cyclohexanol (3.004 g, 30 mmol), FeCl<sub>2</sub> (0.063 g, 5 mol%), 1,10-phenanthroline (0.180 g, 10 mol%) and NaOtBu (1.440 g, 15 mmol) were added successively under a nitrogen atmosphere in absence of any added solvent. The reaction mixture was heated at 150 °C in a preheated oil bath for 8 h. Thereafter, the reaction mixture was cooled down to r.t. and the crude product was purified by column chromatography (hexane/EtOAc 8.5:1.5 as eluent) to give a white solid as pure product (1.937 g, 90%).

### General condition for one-pot alkylation-hydroxylation of oxindole:

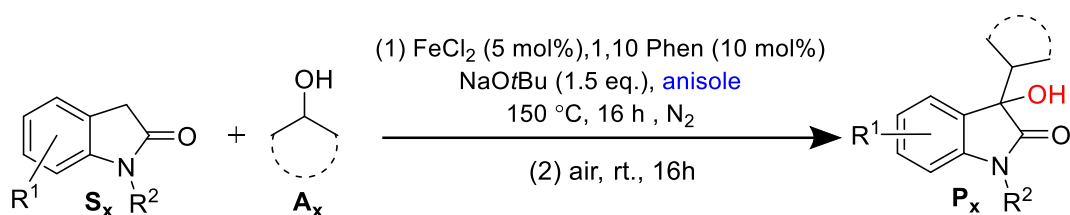

In a 15 mL dried pressure tube fitted with a magnetic stir bar, a mixture of oxindole (0.3 mmol), secondary alcohols (0.6 mmol), FeCl<sub>2</sub> (0.020 g, 5 mol%), 1,10-phenanthroline (0.054 g, 10 mol%), NaOtBu (1.5 eq.) and anisole (1 mL) were successively added under a nitrogen atmosphere. Then the reaction mixture was heated at 150 °C in a preheated oil bath for 16 h. After cooling down to room temperature the reaction mixture was stirred under air for 16 h. Finally, concentrated by removing the solvent under vacuum, and the residue was purified by column chromatography with hexane/ethyl acetate (hexane/ethyl acetate = 7:3) as eluent to give the desired product.

### General condition for gram scale synthesis of 3-cyclohexyl-3-hydroxyindolin-2-one (P<sub>30</sub>):

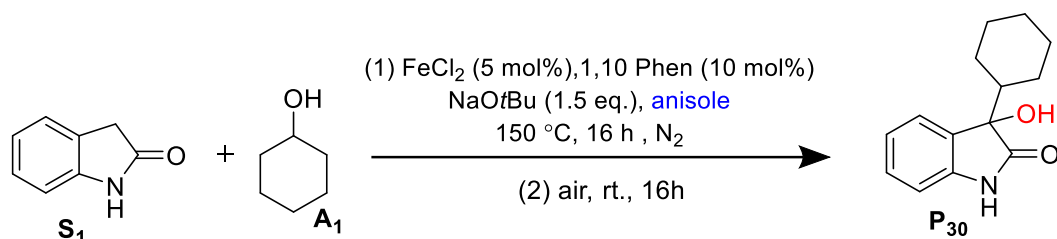

In a 100 mL dried pressure tube fitted with a magnetic stir bar, a mixture of 2-oxindole (1.065 g, 10.0 mmol), cyclohexanol (2.003 g, 20 mmol), FeCl<sub>2</sub> (0.063 g, 5 mol%), 1,10-phenanthroline (0.180 g, 10 mol%), NaOtBu (1.440 g, 15 mmol) and anisole (10 mL) were added successively under a nitrogen atmosphere. Then the reaction mixture was heated at 150 °C in a preheated oil bath for 16 h. After cooling down to room temperature the reaction mixture was stirred under air for 16 h. Finally, concentrated by removing the solvent under vacuum, and the residue was purified by column chromatography with hexane/ethyl acetate (hexane/ethyl acetate = 7:3) as eluent to give the desired product.

## **Preparative scale for the determination of Green Metrics:**

**Analysis of optimized reactions with CHEM21 green metrics toolkit:** In order to evaluate the advantages and shortcomings of our two optimized catalytic protocols for the C( $\alpha$ )-alkylation of 2-oxindole with cyclohexanol (Method A and B), we analyzed them with the CHEM21 green metrics toolkit (Table S1). The results were also compared with the first report of base metal catalyzed 2-oxindole alkylation with secondary alcohol published by Sundararaju group (Method C).<sup>S1</sup> We also analyzed the optimized synthetic protocol for the one-pot alkylation-hydroxylation of 2-oxindole with cyclohexanol (Method D). In this context, we have employed green, amber, and red flags, representing acceptable, acceptable with concerns and unacceptable processes, respectively. All four methods A, B, C and D gave full conversion, excellent yield and complete selectivity and hence all methods received green flags for those metrics. Good atom economy and acceptable reaction mass efficiency were found in our optimized methods (Method A, B and D). In contrast, poor reaction mass efficiency was noted in Method C. We have used catalyst and green solvents (anisole or solvent-free) and thus, Method A, B and D earn green flags in solvent and catalyst metrics. However, Method C got amber flag for the use of hazardous toluene. Catalyst recovery is an important feature; however, catalysts could not be recovered in all the methods and they all received amber flags. We used most sustainable transition metal iron in these alkylations (Method A and B) and one-pot alkylation/hydroxylation (Method D) and they received green flags. In contrast, the alkylation method published by Sundararaju group (Method C) received amber flag for element metric due to use of cobalt. The reactions were performed in batches instead of continuous flow reactions. Thus, all methods earned amber flag. Our reaction conditions in terms of health & safety are in line with green metrics and received green flags. However, Method C got amber flag due to the use of toluene. So, we concluded that our optimized methods of alkylation have more green and sustainable features as compared to the past report.

**Table S1: Comparison of optimized methods for the alkylation and one-pot alkylation-hydroxylation of 2-oxindole.**

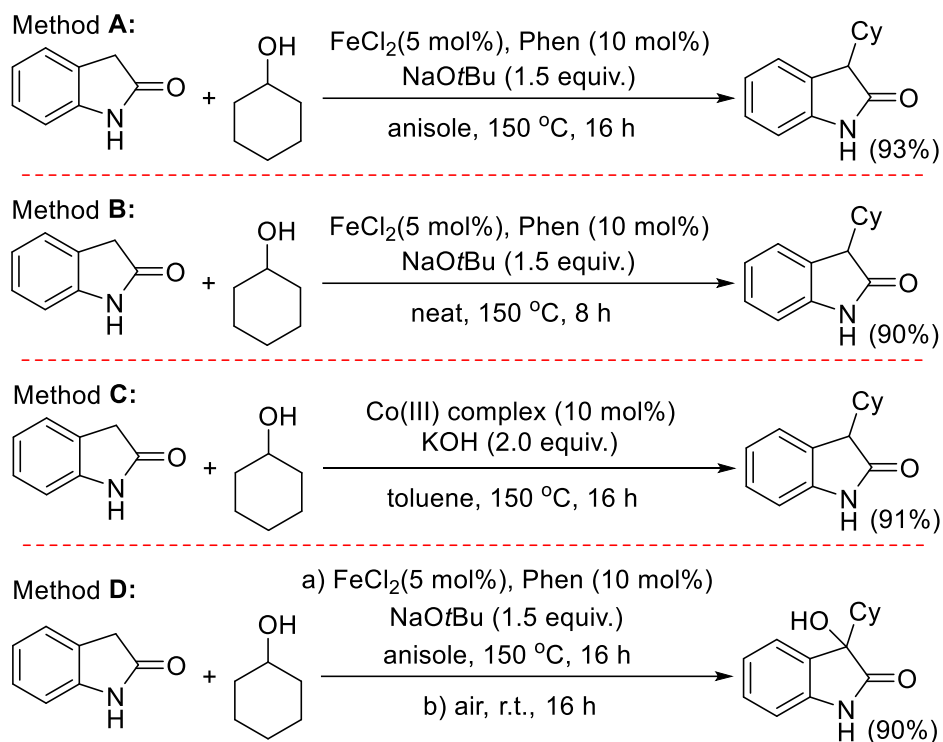

| Metric          | Meth. A | Meth. B | Meth. C | Meth. D |
|-----------------|---------|---------|---------|---------|
| Yield           | 93      | 90      | 91      | 90      |
| Conversion      | 100     | 100     | 100     | 100     |
| Selectivity     | 100     | 100     | 100     | 100     |
| Atom economy    | 65.4    | 65.4    | 77.1    | 64.0    |
| Mass efficiency | 40.8    | 28.7    | 44.0    | 42.4    |
| Solvents        | anisole | neat    | toluene | anisole |
| Catalyst        | Yes     | Yes     | Yes     | Yes     |
| Cat. recovery   | No      | No      | No      | No      |
| Element         | Fe      | Fe      | Co      | Fe      |
| Reactor         | Batch   | Batch   | Batch   | Batch   |
| Health & safety |         |         |         |         |



**E-factor for the synthesis of 3-cyclohexylindolin-2-one in presence of anisole as solvent****(Method A, in anisole):**

|                   |                                |           |
|-------------------|--------------------------------|-----------|
| Reagent 1:        | Oxindole (10 mmol)             | = 1.33 g  |
| Reagent 2:        | Cyclohexanol (20 mmol)         | = 2.002 g |
| Base:             | NaOtBu (15 mmol)               | = 1.411 g |
| Catalyst:         | FeCl <sub>2</sub> (5 mol %)    | = 0.063 g |
| Ligand:           | 1,10-Phenanthroline (10 mol %) | = 0.180 g |
| Reaction solvent: | anisole (10 mL, d= 0.995)      | = 9.95 g  |

[Solvent anisole (10 mL of reaction and 5 mL of washing) was placed in a round bottom flask and roughly 80 %; 11.94 g of anisole was recovered via solvent distillation process; waste = (14.925 – 11.94) = 3.01 g]

Product: 3-cyclohexylindolin-2-one (93% conversion; 2.002 g)

$$E\text{-factor} = \frac{\text{mass (waste)}}{\text{mass (product)}}$$

$$= \frac{1.33 \text{ g (Oxindole)} + 2.002 \text{ g (cyclohexanol)} + 1.411 \text{ g (base)} + 0.243 \text{ g (FeCl}_2\text{ + Ligand)} + 3.01 \text{ g (solvent anisole)}}{2.002 \text{ g (product)}}$$

$$= 7.996 \text{ g} / 2.002 \text{ g}$$

$$= \mathbf{3.99 \text{ kg waste} / 1 \text{ kg of product}}$$

**E-factor for the synthesis of 3-cyclohexylindolin-2-one under neat reaction condition****(Method B, neat):**

|                   |                                  |           |
|-------------------|----------------------------------|-----------|
| Reagent 1:        | Oxindole (10 mmol)               | = 1.33 g  |
| Reagent 2:        | Cyclohexanol (40 mmol)           | = 4.006 g |
| Base:             | NaOtBu (15 mmol)                 | = 1.411 g |
| Catalyst:         | FeCl <sub>2</sub> (5 mol %)      | = 0.063 g |
| Ligand:           | 1,10-Phenanthroline (10 mol %)   | = 0.180 g |
| Reaction solvent: | Neat                             | = 00.00 g |
| Workup solvent:   | ethyl acetate (5 x 5 mL) x 0.902 | = 22.55 g |

[Combined EtOAc was placed in a round bottom flask and roughly 95 %; 21.42 g of ethyl acetate was recovered via solvent distillation process; waste = (22.55 – 21.42) = 1.13 g]

Product: 3-cyclohexylindolin-2-one (90% conversion; 1.937 g)

$$E\text{-factor} = \frac{\text{mass (waste)}}{\text{mass (product)}}$$

$$= \frac{1.33 \text{ g (Oxindole)} + 4.006 \text{ g (cyclohexanol)} + 1.411 \text{ g (base)} + 0.243 \text{ g (FeCl}_2\text{ + Ligand)} + 1.13 \text{ g (ethyl acetate during isolation of the product)}}{1.937 \text{ g (product)}}$$

$$= 8.12 \text{ g} / 1.937 \text{ g}$$

$$= \mathbf{4.19 \text{ kg waste} / 1 \text{ kg of product}}$$

***E*-factor for the synthesis of 3-cyclohexyl-3-hydroxyindolin-2-one (Method D, in anisole):**

|                   |                                                                                                                                                                                                                     |           |
|-------------------|---------------------------------------------------------------------------------------------------------------------------------------------------------------------------------------------------------------------|-----------|
| Reagent 1:        | Oxindole (10 mmol)                                                                                                                                                                                                  | = 1.33 g  |
| Reagent 2:        | Cyclohexanol (20 mmol)                                                                                                                                                                                              | = 2.002 g |
| Base:             | NaOtBu (15 mmol)                                                                                                                                                                                                    | = 1.411 g |
| Catalyst:         | FeCl <sub>2</sub> (5 mol %)                                                                                                                                                                                         | = 0.063 g |
| Ligand:           | 1,10-Phenanthroline (10 mol %)                                                                                                                                                                                      | = 0.180 g |
| Reaction solvent: | anisole (10 mL, d= 0.995)                                                                                                                                                                                           | = 9.95 g  |
|                   | [Solvent anisole (10 mL of reaction and 5 mL of washing) was placed in a round bottom flask and roughly 83 %; 12.39 g of anisole was recovered via solvent distillation process; waste = (14.925 – 12.39) = 2.54 g] |           |
| Product:          | 3-cyclohexyl-3-hydroxyindolin-2-one (90% conversion; 2.081 g)                                                                                                                                                       |           |

$$\begin{aligned} E\text{-factor} &= \frac{\text{mass (waste)}}{\text{mass (product)}} \\ &= \frac{1.33 \text{ g (Oxindole)} + 2.002 \text{ g (cyclohexanol)} + 1.411 \text{ g (base)} + 0.243 \text{ g (FeCl}_2\text{ + Ligand)} + 2.54 \text{ g (solvent anisole)}}{2.081 \text{ g (product)}} \\ &= 7.526 \text{ g} / 2.081 \text{ g} \\ &= \mathbf{3.61 \text{ kg waste} / 1 \text{ kg of product}} \end{aligned}$$

**Table S2. Calculation of Eco Scale for the synthesis of 3-cyclohexylindolin-2-one (Method A in anisole)**

**Eco Scale = 100 – Sum of individuals penalties**  
**Score on EcoScale: >75, Excellent; >50, Acceptable; <50, Inadequate**

### A) Calculations of Penalty Points

| Parameters<br>Points                                                                                      | Penalty       |
|-----------------------------------------------------------------------------------------------------------|---------------|
| 1. Yield $(100 - \% \text{ yield})/2 = (100 - 93)/2 = 3.5$                                                | = 3.5         |
| <b>2. Price of reaction components</b><br>(To obtain 10 mmol of 3-cyclohexylindolin-2-one as end product) |               |
| (a) Oxindole = 12.18 mmol = 1.691 g = USD 4.90                                                            |               |
| (b) Cyclohexanol (24.36 mmol) = 2.536 mL = USD 0.08                                                       |               |
| (c) NaOtBu (18.27 mmol) = 1.754 g = 0.45 USD                                                              |               |
| (d) FeCl <sub>2</sub> = 5 mol % = 0.077 g = USD 0.085                                                     |               |
| (e) 1,10-Phenanthroline (10 mol %) = 0.219 g = 0.64 USD                                                   |               |
| (f) solvent anisole (10 mL) = 1 USD                                                                       |               |
| Total cost for the synthesis of 3-cyclohexylindolin-2-one = USD 7.155                                     |               |
| Thus, inexpensive since it is <USD 10                                                                     | = 0           |
| <b>3. Safety</b>                                                                                          |               |
| 1,10-Phenanthroline (T)                                                                                   | = 5           |
| <b>4. Technical Setup</b>                                                                                 |               |
| Glove Box                                                                                                 | = 3           |
| <b>5. Temperature and time</b>                                                                            |               |
| Heating, >1 h                                                                                             | = 3           |
| <b>6. Workup and purification</b>                                                                         |               |
| Removal of solvent with bp <150°C                                                                         | = 0           |
| Classical chromatography                                                                                  | = 10          |
| <b>Total Penalty Points</b>                                                                               | <b>= 24.5</b> |

### B) EcoScale calculation:

EcoScale score = 100 – 24.5 = 75.5 (>75; it is an excellent synthetic process)

**Table S3. Calculation of EcoScale for the synthesis of 3-cyclohexylindolin-2-one in presence of anisole as solvent (Method B, under neat)**

**Eco Scale = 100 – Sum of individuals penalties**  
**Score on EcoScale: >75, Excellent; >50, Acceptable; <50, Inadequate**

### A) Calculations of Penalty Points

| Parameters<br>Points                                                                                      | Penalty     |
|-----------------------------------------------------------------------------------------------------------|-------------|
| 1. Yield $(100 - \% \text{ yield})/2 = (100 - 90)/2 = 5$                                                  | = 5         |
| <b>2. Price of reaction components</b><br>(To obtain 10 mmol of 3-cyclohexylindolin-2-one as end product) |             |
| (a) Oxindole = 12.18 mmol = 1.691 g = USD 4.90                                                            |             |
| (b) Cyclohexanol (48.72 mmol) = 5.072 mL = USD 0.16                                                       |             |
| (c) NaOtBu (18.27 mmol) = 1.754 g = 0.45 USD                                                              |             |
| (d) FeCl <sub>2</sub> = 5 mol % = 0.077 g = USD 0.085                                                     |             |
| (e) 1,10-Phenanthroline (10 mol %) = 0.219 g = 0.64 USD                                                   |             |
| Total cost for the synthesis of 3-cyclohexylindolin-2-one = USD 6.235                                     |             |
| Thus, inexpensive since it is <USD 10                                                                     | = 0         |
| <b>3. Safety</b>                                                                                          |             |
| 1,10-Phenanthroline (T)                                                                                   | = 5         |
| <b>4. Technical Setup</b>                                                                                 |             |
| Glove Box                                                                                                 | = 3         |
| <b>5. Temperature and time</b>                                                                            |             |
| Heating, >1 h                                                                                             | = 3         |
| <b>6. Workup and purification</b>                                                                         |             |
| Removal of solvent with bp <150°C                                                                         | = 0         |
| Classical chromatography                                                                                  | = 10        |
| <b>Total Penalty Points</b>                                                                               | <b>= 26</b> |

### B) EcoScale calculation:

EcoScale score = 100 – 26 = 74 (>50; it is an acceptable synthetic process)

**Table S4. Calculation of Eco Scale for the synthesis of 3-cyclohexyl-3-hydroxyindolin-2-one (Method D, in anisole)**

**Eco Scale = 100 – Sum of individuals penalties**  
**Score on EcoScale: >75, Excellent; >50, Acceptable; <50, Inadequate**

### A) Calculations of Penalty Points

| Parameters<br>Points                                                                                      | Penalty     |
|-----------------------------------------------------------------------------------------------------------|-------------|
| 1. Yield $(100 - \% \text{ yield})/2 = (100 - 90)/2 = 5$                                                  | = 5         |
| <b>2. Price of reaction components</b><br>(To obtain 10 mmol of 3-cyclohexylindolin-2-one as end product) |             |
| (a) Oxindole = 12.18 mmol = 1.691 g = USD 4.90                                                            |             |
| (b) Cyclohexanol (36.54 mmol) = 3.804 mL = USD 0.12                                                       |             |
| (c) NaOtBu (18.27 mmol) = 1.754 g = 0.45 USD                                                              |             |
| (d) FeCl <sub>2</sub> = 5 mol % = 0.077 g = USD 0.085                                                     |             |
| (e) 1,10-Phenanthroline (10 mol %) = 0.219 g = 0.64 USD                                                   |             |
| (f) solvent anisole (10 mL) = 1 USD                                                                       |             |
| Total cost for the synthesis of 3-cyclohexylindolin-2-one = USD 7.195                                     |             |
| Thus, inexpensive since it is <USD 10                                                                     | = 0         |
| <b>3. Safety</b>                                                                                          |             |
| 1,10-Phenanthroline (T)                                                                                   | = 5         |
| <b>4. Technical Setup</b>                                                                                 |             |
| Glove Box                                                                                                 | = 3         |
| <b>5. Temperature and time</b>                                                                            |             |
| Heating, >1 h                                                                                             | = 3         |
| <b>6. Workup and purification</b>                                                                         |             |
| Removal of solvent with bp <150°C                                                                         | = 0         |
| Classical chromatography                                                                                  | = 10        |
| <b>Total Penalty Points</b>                                                                               | <b>= 26</b> |

### B) EcoScale calculation:

EcoScale score = 100 – 26 = 74 (>50; it is an acceptable synthetic process)

## NMR data of pure alkylated products:

The following products are obtained by  $\alpha$ -alkylation of fluorene with primary and secondary alcohols using the standard catalytic protocol. Known compounds are characterized by  $^1\text{H}$  and  $^{13}\text{C}\{^1\text{H}\}$  NMR spectroscopies and new compounds are characterized by  $^1\text{H}$  and  $^{13}\text{C}\{^1\text{H}\}$  NMR spectroscopies and HRMS:

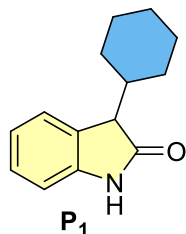

**3-cyclohexylindolin-2-one (P<sub>1</sub>):**<sup>1</sup> The crude product was purified by column chromatography (hexane/EtOAc 8.5:1.5 as eluent) to give pure product **P<sub>1</sub>** as a colourless solid (0.055 g, 93%).  $^1\text{H}$  NMR (400 MHz,  $\text{CDCl}_3$ )  $\delta$  9.04 (brs, 1H), 7.30 – 7.26 (m, 1H), 7.22 (t,  $J = 7.7$  Hz, 1H), 7.03 (t,  $J = 7.5$  Hz, 1H), 6.93 (d,  $J = 7.6$  Hz, 1H), 3.40 (d,  $J = 3.2$  Hz, 1H), 2.21 – 2.15 (m, 1H), 1.83 – 1.43 (m, 6H), 1.35 – 1.10 (m, 4H).  $^{13}\text{C}\{^1\text{H}\}$  NMR (101 MHz,  $\text{CDCl}_3$ )  $\delta$  180.4, 142.1, 128.8, 127.8, 124.8, 122.1, 109.7, 52.2, 41.0, 30.5, 28.5, 26.8, 26.4, 26.2.

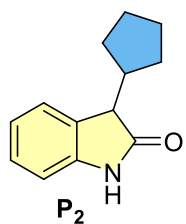

**3-cyclopentylindolin-2-one (P<sub>2</sub>):**<sup>1</sup> The crude product was purified by column chromatography (hexane/EtOAc 8.5:1.5 as eluent) to give pure product **P<sub>2</sub>** as a colourless solid (0.054 g, 90%).  $^1\text{H}$  NMR (400 MHz,  $\text{CDCl}_3$ )  $\delta$  9.30 (s, 1H), 7.19 (d,  $J = 7.5$  Hz, 1H), 7.12 (t,  $J = 7.7$  Hz, 1H), 6.91 (t,  $J = 7.5$  Hz, 1H), 6.84 (d,  $J = 7.7$  Hz, 1H), 3.45 (d,  $J = 5.2$  Hz, 1H), 2.46 – 2.33 (m, 1H), 1.90 – 1.70 (m, 1H), 1.73 – 1.63 (m, 1H), 1.62 – 1.38 (m, 5H), 1.30 – 1.16 (m, 1H).  $^{13}\text{C}\{^1\text{H}\}$  NMR (101 MHz,  $\text{CDCl}_3$ )  $\delta$  180.9, 142.1, 129.2, 127.9, 124.8, 122.1, 109.9, 49.3, 42.0, 30.0, 28.4, 25.2, 25.1.

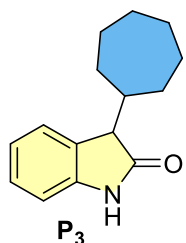

**3-cycloheptylindolin-2-one (P<sub>3</sub>):**<sup>1</sup> The crude product was purified by column chromatography (hexane/EtOAc 8.5:1.5 as eluent) to give pure product **P<sub>3</sub>** as a colourless solid (0.06 g, 87%).  $^1\text{H}$  NMR (400 MHz,  $\text{CDCl}_3$ )  $\delta$  8.89 (s, 1H), 7.20 (d,  $J = 9.7$  Hz, 1H), 7.13 (t,  $J = 7.7$  Hz, 1H),

6.93 (t,  $J = 7.5$  Hz, 1H), 6.83 (d,  $J = 7.7$  Hz, 1H), 3.38 (d,  $J = 2.8$  Hz, 1H), 2.29 – 2.21 (m, 1H), 1.75 – 1.66 (m, 2H), 1.61 – 1.48 (m, 4H), 1.43 – 1.32 (m, 4H), 1.30 – 1.12 (m, 2H).  $^{13}\text{C}\{^1\text{H}\}$  NMR (101 MHz,  $\text{CDCl}_3$ )  $\delta$  180.4, 142.1, 128.9, 127.9, 124.6, 122.2, 109.7, 53.3, 42.4, 32.7, 30.5, 27.9, 27.6, 27.4, 27.1.

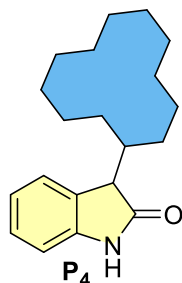

**3-cyclododecylindolin-2-one (P<sub>4</sub>):**<sup>3</sup> The crude product was purified by column chromatography (hexane/EtOAc 8.5:1.5 as eluent) to give pure product **P<sub>4</sub>** as pale yellow oil (0.073 g, 82%).  $^1\text{H}$  NMR (400 MHz,  $\text{CDCl}_3$ )  $\delta$  8.94 (s, 1H), 7.30 – 7.18 (m, 2H), 7.02 (t,  $J = 7.2$  Hz, 1H), 6.92 (d,  $J = 7.7$  Hz, 1H), 3.52 (d,  $J = 2.7$  Hz, 1H), 1.71 – 1.63 (m, 1H), 1.52 – 1.24 (m, 21H).  $^{13}\text{C}\{^1\text{H}\}$  NMR (101 MHz,  $\text{CDCl}_3$ )  $\delta$  180.7, 142.1, 129.3, 127.7, 124.5, 122.1, 109.8, 49.3, 35.3, 27.7, 26.5, 24.3, 24.2, 24.1, 23.4, 23.2, 22.9, 22.7.

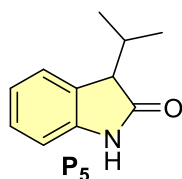

**3-isopropylindolin-2-one (P<sub>5</sub>):**<sup>1</sup> The crude product was purified by column chromatography (hexane/EtOAc 8.5:1.5 as eluent) to give pure product **P<sub>5</sub>** as a pale yellow solid (0.039 g, 75%).  $^1\text{H}$  NMR (400 MHz,  $\text{CDCl}_3$ )  $\delta$  8.98 (s, 1H), 7.28 (d,  $J = 6.1$  Hz, 1H), 7.23 (t,  $J = 7.8$  Hz, 1H), 7.03 (t,  $J = 7.5$  Hz, 1H), 6.93 (d,  $J = 7.7$  Hz, 1H), 3.43 (d,  $J = 3.4$  Hz, 1H), 2.62 – 2.43 (m, 1H), 1.15 (d,  $J = 7.0$  Hz, 3H), 0.94 (d,  $J = 6.8$  Hz, 3H).  $^{13}\text{C}\{^1\text{H}\}$  NMR (101 MHz,  $\text{CDCl}_3$ )  $\delta$  180.3, 142.2, 128.5, 127.92, 124.8, 122.2, 109.8, 52.3, 30.9, 20.0, 18.1.

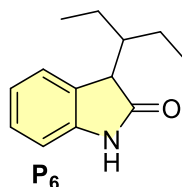

**3-(pentan-3-yl)indolin-2-one (P<sub>6</sub>):**<sup>1</sup> The crude product was purified by column chromatography (hexane/EtOAc 8.5:1.5 as eluent) to give pure product **P<sub>6</sub>** as a pale yellow oil (0.051 g, 84%).  $^1\text{H}$  NMR (400 MHz,  $\text{CDCl}_3$ )  $\delta$  8.93 (s, 1H), 7.22 (t,  $J = 7.2$  Hz, 2H), 7.02 (t,  $J = 7.5$  Hz, 1H), 6.93 (d,  $J = 7.9$  Hz, 1H), 3.63 (d,  $J = 2.6$  Hz, 1H), 2.10 – 1.99 (m, 1H), 1.72 – 1.62 (m, 1H), 1.53 – 1.35 (m, 2H), 1.30 – 1.17 (m, 1H), 1.05 (t,  $J = 7.4$  Hz, 3H), 0.89 (t,  $J = 7.4$  Hz, 3H).  $^{13}\text{C}\{^1\text{H}\}$  NMR (101 MHz,  $\text{CDCl}_3$ )  $\delta$  181.0, 142.0, 128.8, 127.8, 124.6, 122.2, 109.8, 48.4, 44.3, 24.5, 23.6, 12.5, 12.3.

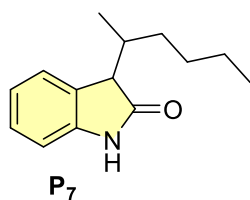

**3-(hexan-2-yl)indolin-2-one (P<sub>7</sub>):**<sup>1</sup> The crude product was purified by column chromatography (hexane/EtOAc 8.5:1.5 as eluent) to give pure product **P<sub>7</sub>** as a pale yellow oil (0.053 g, 81%). Two isomers ratio 1.45:1. <sup>1</sup>H NMR (400 MHz, CDCl<sub>3</sub>) (m<sub>j</sub>: major isomer, m<sub>n</sub>: minor isomer) δ 9.20 (brs, 1H, m<sub>j</sub>), 9.09 (s, 1H, m<sub>n</sub>), 7.27 – 7.19 (m, 3H), 7.03 (t, *J* = 7.5 Hz, 2H), 6.93 (t, *J* = 7.0 Hz, 2H), 3.52 (d, *J* = 3.1 Hz, 1H, m<sub>j</sub>), 3.48 (d, *J* = 2.9 Hz, 1H, m<sub>n</sub>), 2.43 – 2.34 (m, 1H, m<sub>j</sub>), 2.33 – 2.23 (m, 1H, m<sub>n</sub>), 1.65 – 1.57 (m, 1H, m<sub>n</sub>), 1.55 – 1.48 (m, 1H, m<sub>j</sub>), 1.45 – 1.38 (m, 3H, m<sub>n</sub>), 1.32 – 1.25 (m, 5H, m<sub>j</sub>), 1.04 (d, *J* = 6.9 Hz, 2H, m<sub>n</sub>), 0.95 (t, *J* = 6.9 Hz, 3H, m<sub>j</sub>), 0.89 (t, *J* = 6.9 Hz, 2H, m<sub>n</sub>), 0.79 (d, *J* = 6.8 Hz, 3H, m<sub>j</sub>). <sup>13</sup>C {<sup>1</sup>H} NMR (101 MHz, CDCl<sub>3</sub>) δ 181.0, 180.3, 142.3, 142.1, 129.2, 128.1, 127.9, 127.8, 124.9, 124.4, 122.2, 122.1, 109.9, 109.8, 51.5, 51.0, 35.9, 35.5, 34.3, 32.5, 29.9, 29.8, 22.8, 17.0, 15.4, 14.2.

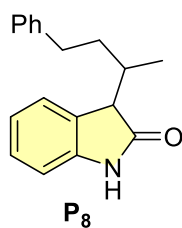

**3-(4-phenylbutan-2-yl)indolin-2-one (P<sub>8</sub>):** The crude product was purified by column chromatography (hexane/EtOAc 8:2 as eluent) to give pure product **P<sub>8</sub>** as a pale yellow oil (0.065 g, 82%). Two isomers ratio 1.66:1. <sup>1</sup>H NMR (400 MHz, CDCl<sub>3</sub>) (m<sub>j</sub>: major isomer, m<sub>n</sub>: minor isomer) δ 9.33 (m<sub>j</sub>), 9.21 (m<sub>n</sub>) (two s, 1H), 7.24 – 7.04 (m, 7H), 6.95 – 6.77 (m, 2H), 3.44 (m<sub>j</sub>), 3.41 (m<sub>n</sub>) (two d, *J* = 3 Hz, 1H), 2.77 – 2.45 (m, 2H), 2.39 – 2.19 (m, 1H), 1.89 – 1.47 (m, 2H), 0.98 (m<sub>j</sub>), 0.79 (m<sub>n</sub>) (two d, *J* = 6.8 Hz, 3H). <sup>13</sup>C {<sup>1</sup>H} NMR (101 MHz, CDCl<sub>3</sub>) δ 180.8, 180.2, 142.3, 142.2, 142.1, 128.9, 128.6, 128.5, 128.4, 128.3, 128.0, 127.9, 127.8, 126.0, 125.8, 124.8, 124.3, 122.2, 122.1, 110.0, 109.9, 51.2, 51.1, 36.5, 35.4, 35.3, 34.7, 34.1, 33.9, 16.9, 15.3. HRMS (ESI-TOF) *m/z*: [M + H]<sup>+</sup> Calcd for [C<sub>18</sub>H<sub>20</sub>NO] 266.1545; Found 266.1544.

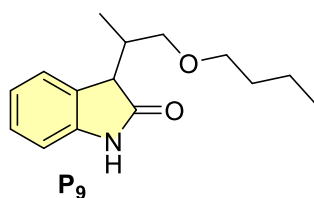

**3-(1-butoxypropan-2-yl)indolin-2-one (P<sub>9</sub>):** The crude product was purified by column chromatography (hexane/EtOAc 8:2 as eluent) to give pure product **P<sub>9</sub>** as a pale yellow oil (0.058 g, 79%). Two isomers ratio 1:1. <sup>1</sup>H NMR (400 MHz, CDCl<sub>3</sub>) (m<sub>j</sub>: major isomer, m<sub>n</sub>: minor isomer) δ 9.13 (m<sub>j</sub>), 9.00 (m<sub>n</sub>) (two brs, 1H), 7.13 (dt, *J* = 7.8, 5.7 Hz, 2H), 6.93 (t, *J* = 7.5 Hz, 1H), 6.83 (t, *J* = 8.5 Hz, 1H), 3.70 (m<sub>j</sub>), 3.56 (m<sub>n</sub>) (two d, *J* = 2.8 Hz, 1H), 3.53 – 3.20 (m, 4H), 2.73 – 2.46 (m, 1H), 1.58 – 1.38 (m, 2H), 1.37 – 1.17 (m, 2H), 0.87 (m<sub>j</sub>), 0.84 (m<sub>n</sub>)



(one d,  $J = 7.1$  Hz, one t,  $J = 8$  Hz, 3H), 0.80 (m<sub>n</sub>), 0.62 (m<sub>n</sub>) (one d,  $J = 7.1$  Hz, one t,  $J = 8$  Hz, 3H).  $^{13}\text{C}\{^1\text{H}\}$  NMR (101 MHz,  $\text{CDCl}_3$ )  $\delta$  181.0, 180.0, 142.4, 142.3, 128.8, 127.9, 127.8, 127.5, 125.3, 124.1, 122.1, 109.9, 109.7, 73.1, 72.7, 71.0, 70.9, 48.2, 47.9, 36.2, 35.2, 32.0, 31.8, 19.5, 19.4, 14.1, 14.0, 13.7, 12.0. HRMS (ESI-TOF)  $m/z$ :  $[\text{M} + \text{H}]^+$  Calcd for  $[\text{C}_{15}\text{H}_{22}\text{NO}_2]$  248.1651; Found 248.1674.

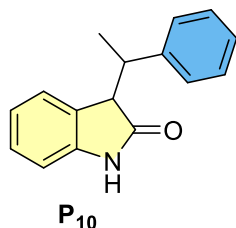

**3-(1-phenylethyl)indolin-2-one (P<sub>10</sub>):**<sup>1</sup> The crude product was purified by column chromatography (hexane/EtOAc 8:2 as eluent) to give pure product **P<sub>10</sub>** as a colourless oil (0.055 g, 78%). Two isomers ratio 1.79:1.  $^1\text{H}$  NMR (400 MHz,  $\text{CDCl}_3$ ) (m<sub>j</sub>: major isomer, m<sub>n</sub>: minor isomer):  $\delta$  8.93 (brs, 1H, m<sub>j</sub>), 8.56 (brs, 1H, m<sub>n</sub>), 7.41 – 7.33 (m, 4H, m<sub>j</sub>), 7.32 – 7.26 (m, 1H, m<sub>n</sub>), 7.22 – 7.15 (m, 3H, m<sub>j</sub>), 7.13 – 7.05 (m, 2H, m<sub>n</sub>), 6.97 (t,  $J = 7.5$  Hz, 1H, m<sub>n</sub>), 6.92 – 6.85 (m, 2H, m<sub>j</sub>), 6.78 (d,  $J = 7.7$  Hz, 1H, m<sub>n</sub>), 6.53 (d,  $J = 7.4$  Hz, 1H, m<sub>j</sub>), 3.87 – 3.82 (m, 1H, m<sub>j</sub>), 3.81 (d,  $J = 3.7$  Hz, 1H, m<sub>j</sub>), 3.69 (d,  $J = 5.5$  Hz, 1H, m<sub>n</sub>), 3.62 – 3.44 (m, 1H, m<sub>n</sub>), 1.66 (d,  $J = 7.2$  Hz, 3H, m<sub>n</sub>), 1.21 (d,  $J = 7.0$  Hz, 3H, m<sub>j</sub>).  $^{13}\text{C}\{^1\text{H}\}$  NMR (101 MHz,  $\text{CDCl}_3$ )  $\delta$  179.7, 179.3, 142.9, 142.2, 142.1, 141.8, 128.5, 128.2, 128.1, 128.0, 127.9, 127.0, 126.9, 126.8, 125.2, 122.0, 109.7, 53.1, 52.5, 41.9, 39.6, 19.4, 13.6.

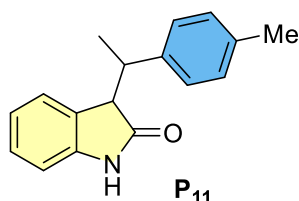

**3-(1-(p-tolyl)ethyl)indolin-2-one (P<sub>11</sub>):**<sup>1</sup> The crude product was purified by column chromatography (hexane/EtOAc 8:2 as eluent) to give pure product **P<sub>11</sub>** as a pale yellow oil (0.056 g, 75%). Two isomers ratio 2.22:1.  $^1\text{H}$  NMR (400 MHz,  $\text{CDCl}_3$ ) (m<sub>j</sub>: major isomer, m<sub>n</sub>: minor isomer)  $\delta$  8.48 (s, 1H, m<sub>j</sub>), 8.12 (s, 1H, m<sub>n</sub>), 7.21 – 7.14 (m, 5H), 7.08 (d,  $J = 7.4$  Hz, 1H, m<sub>n</sub>), 6.96 (s, 2H), 6.86 (t,  $J = 7.9$  Hz, 2H), 6.74 (d,  $J = 7.8$  Hz, 1H, m<sub>n</sub>), 6.54 (d,  $J = 7.4$  Hz, 1H, m<sub>j</sub>), 3.79 – 3.70 (m, 2H), 3.64 (d,  $J = 5.4$  Hz, 1H, m<sub>n</sub>), 3.55 – 3.42 (m, 1H, m<sub>n</sub>), 2.36 (s, 3H, m<sub>j</sub>), 2.24 (s, 3H, m<sub>n</sub>), 1.60 (d,  $J = 7.2$  Hz, 3H, m<sub>n</sub>), 1.16 (d,  $J = 6.9$  Hz, 3H, m<sub>j</sub>).  $^{13}\text{C}\{^1\text{H}\}$  NMR (101 MHz,  $\text{CDCl}_3$ )  $\delta$  179.4, 179.0, 142.0, 141.7, 139.8, 139.2, 136.3, 129.2, 128.8, 128.3, 128.1, 128.0, 127.9, 127.8, 127.2, 125.3, 122.0, 109.6, 53.1, 52.5, 41.6, 39.2, 21.2, 21.1, 19.5, 13.7.

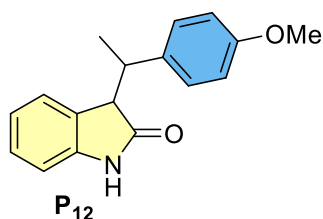

**3-(1-(4-methoxyphenyl)ethyl)indolin-2-one (P<sub>12</sub>):**<sup>3</sup> The crude product was purified by column chromatography (hexane/EtOAc 8:2 as eluent) to give pure product **P<sub>12</sub>** as a pale yellow oil (0.064 g, 80%). Two isomers ratio 1.56:1. <sup>1</sup>H NMR (400 MHz, CDCl<sub>3</sub>) (m<sub>j</sub>: major isomer, m<sub>n</sub>: minor isomer) δ 9.13 (brs, 1H, m<sub>j</sub>), 8.76 (brs, 1H, m<sub>n</sub>), 7.24 (d, *J* = 8.6 Hz, 2H, m<sub>j</sub>), 7.19 (t, *J* = 7.7 Hz, 1H, m<sub>j</sub>), 7.13 (d, *J* = 7.4 Hz, 1H, m<sub>n</sub>), 7.02 – 6.95 (m, 2H, m<sub>n</sub>), 6.93 – 6.86 (m, 4H, m<sub>j</sub>), 6.78 (d, *J* = 7.7 Hz, 1H, m<sub>n</sub>), 6.68 (d, *J* = 8.6 Hz, 1H, m<sub>j</sub>), 6.56 (d, *J* = 7.4 Hz, 1H, m<sub>n</sub>), 3.84 (s, 3H, m<sub>j</sub>), 3.81 – 3.77 (m, 1H, m<sub>j</sub>), 3.76 (d, *J* = 3.2 Hz, 1H, m<sub>j</sub>), 3.72 (s, 3H, m<sub>n</sub>), 3.65 (d, *J* = 5.3 Hz, 1H, m<sub>n</sub>), 3.56 – 3.48 (m, 1H, m<sub>n</sub>) 1.63 (d, *J* = 7.2 Hz, 2H, m<sub>n</sub>), 1.19 (d, *J* = 6.8 Hz, 3H, m<sub>j</sub>). <sup>13</sup>C{<sup>1</sup>H} NMR (101 MHz, CDCl<sub>3</sub>) δ 179.9, 179.6, 158.4, 158.3, 142.2, 141.9, 134.8, 134.2, 129.0, 128.9, 128.2, 128.1, 128.0, 127.2, 125.2, 125.2, 122.0, 113.8, 113.4, 109.8, 109.7, 55.4, 55.2, 53.3, 52.8, 41.1, 38.9, 19.6, 13.9.

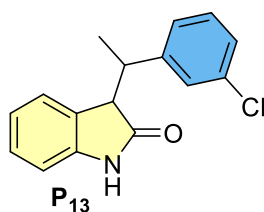

**3-(1-(3-chlorophenyl)ethyl)indolin-2-one (P<sub>13</sub>):** The crude product was purified by column chromatography (hexane/EtOAc 8:2 as eluent) to give pure product **P<sub>13</sub>** as a pale yellow oil (0.055 g, 68%). Two isomers ratio 1.75:1. <sup>1</sup>H NMR (400 MHz, CDCl<sub>3</sub>) (m<sub>j</sub>: major isomer, m<sub>n</sub>: minor isomer): δ 9.03 (s, 1H, m<sub>j</sub>), 8.70 (s, 1H, m<sub>n</sub>), 7.36 – 7.25 (m, 3H), 7.23 – 7.18 (m, 2H), 7.16 – 7.06 (m, 2H), 7.04 – 6.97 (m, 1H), 6.91 (t, *J* = 7.5 Hz, 2H), 6.81 (d, *J* = 7.7 Hz, 1H), 6.57 (d, *J* = 7.5 Hz, 1H), 3.84 – 3.72 (m, 2H, m<sub>j</sub>), 3.67 (d, *J* = 5.1 Hz, 1H, m<sub>n</sub>), 3.59 – 3.46 (m, 1H, m<sub>n</sub>), 1.62 (d, *J* = 7.2 Hz, 3H, m<sub>n</sub>), 1.21 (d, *J* = 6.7 Hz, 3H, m<sub>j</sub>). <sup>13</sup>C{<sup>1</sup>H} NMR (101 MHz, CDCl<sub>3</sub>) δ 179.4, 179.0, 145.0, 144.2, 142.1, 141.8, 134.4, 133.8, 129.7, 129.3, 128.4, 128.3, 128.3, 128.2, 127.7, 127.0, 126.7, 126.4, 126.2, 125.1, 125.0, 122.2, 109.9, 52.8, 52.3, 41.6, 39.4, 19.0, 13.7. HRMS (ESI-TOF) *m/z*: [M + H]<sup>+</sup> Calcd for [C<sub>16</sub>H<sub>15</sub>ClNO] 272.0842; Found 272.0852.

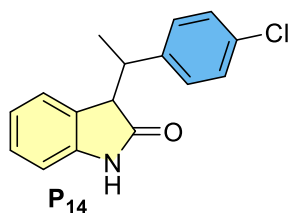

**3-(1-(4-chlorophenyl)ethyl)indolin-2-one (P<sub>14</sub>):**<sup>3</sup> The crude product was purified by column chromatography (hexane/EtOAc 8:2 as eluent) to give pure product **P<sub>14</sub>** as a pale yellow oil (0.058 g, 71%). Two isomers ratio 1.47:1. <sup>1</sup>H NMR (400 MHz, CDCl<sub>3</sub>) (m<sub>j</sub>: major isomer, m<sub>n</sub>: minor isomer) δ 9.18 (brs, 1H, m<sub>j</sub>), 8.85 (brs, 1H, m<sub>n</sub>), 7.32 (d, *J* = 8.5 Hz, 2H, m<sub>j</sub>), 7.25 (d, *J* = 8.5 Hz, 2H, m<sub>n</sub>), 7.19 (d, *J* = 7.9 Hz, 2H, m<sub>j</sub>), 7.09 (d, *J* = 8.4 Hz, 1H, m<sub>n</sub>), 7.01 (d, *J* = 7.7 Hz, 2H, m<sub>j</sub>), 6.91 (t, *J* = 7.7 Hz, 2H, m<sub>j</sub>), 6.80 (d, *J* = 7.7 Hz, 1H, m<sub>n</sub>), 6.59 (d, *J* = 7.4 Hz, 1H, m<sub>j</sub>), 3.82 – 3.73 (m, 2H, m<sub>j</sub>), 3.67 (d, *J* = 5.0 Hz, 1H, m<sub>n</sub>), 3.61 – 3.52 (m, 1H, m<sub>n</sub>), 1.62 (d, *J* = 7.2 Hz, 3H, m<sub>n</sub>), 1.22 (d, *J* = 6.9 Hz, 3H, m<sub>j</sub>). <sup>13</sup>C{<sup>1</sup>H} NMR (101 MHz, CDCl<sub>3</sub>) δ 179.6, 179.2, 142.1, 141.9, 141.3, 140.4, 132.6, 129.4, 129.3, 128.6, 128.3, 128.2, 128.1, 127.7, 126.9, 125.1, 125.0, 122.1, 110.0, 109.9, 52.9, 52.5, 41.2, 39.2, 19.2, 14.0.

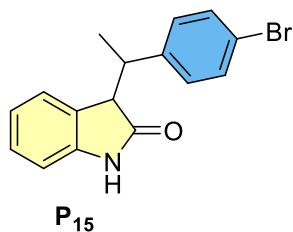

**3-(1-(4-bromophenyl)ethyl)indolin-2-one (P<sub>15</sub>):**<sup>1</sup> The crude product was purified by column chromatography (hexane/EtOAc 8:2 as eluent) to give pure product **P<sub>15</sub>** as a yellow oil (0.068 g, 72%). Two isomers ratio 1.43:1. <sup>1</sup>H NMR (400 MHz, CDCl<sub>3</sub>) (m<sub>j</sub>: major isomer, m<sub>n</sub>: minor isomer) δ 9.04 (s, 1H, m<sub>j</sub>), 8.70 (s, 1H, m<sub>n</sub>), 7.36 (d, *J* = 8.4 Hz, 1H, m<sub>j</sub>), 7.29 – 7.22 (m, 1H, m<sub>j</sub>), 7.14 (d, *J* = 8.4 Hz, 2H, m<sub>j</sub>), 7.11 – 7.02 (m, 4H, m<sub>n</sub>), 6.91 (t, *J* = 7.5 Hz, 1H, m<sub>n</sub>), 6.85 – 6.76 (m, 3H, m<sub>n</sub>), 6.69 (d, *J* = 7.7 Hz, 1H, m<sub>n</sub>), 6.49 (d, *J* = 7.4 Hz, 1H, m<sub>j</sub>), 3.79 – 3.64 (m, 1H, m<sub>j</sub>), 3.62 (d, *J* = 6.1 Hz, 1H, m<sub>j</sub>), 3.56 (d, *J* = 5.1 Hz, 1H, m<sub>n</sub>), 3.49 – 3.40 (m, 1H, m<sub>n</sub>), 1.51 (d, *J* = 7.2 Hz, 3H, m<sub>n</sub>), 1.11 (d, *J* = 7.1 Hz, 3H, m<sub>j</sub>). <sup>13</sup>C{<sup>1</sup>H} NMR (101 MHz, CDCl<sub>3</sub>) δ 179.5, 179.2, 142.1, 141.9, 141.8, 140.9, 131.5, 131.1, 129.8, 129.7, 128.4, 128.2, 128.1, 127.7, 126.8, 125.1, 125.0, 122.1, 120.7, 120.6, 110.0, 109.9, 52.8, 52.4, 41.2, 39.3, 19.2, 13.9.

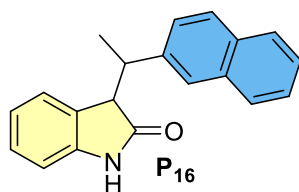

**3-(1-(naphthalen-2-yl)ethyl)indolin-2-one (P<sub>16</sub>):**<sup>1</sup> The crude product was purified by column chromatography (hexane/EtOAc 8:2 as eluent) to give pure product **P<sub>16</sub>** as a brown viscous oil (0.070 g, 81%). Two isomers ratio 1.5:1. <sup>1</sup>H NMR (400 MHz, CDCl<sub>3</sub>) (m<sub>j</sub>: major isomer, m<sub>n</sub>: minor isomer) δ 9.28 (s, 1H, m<sub>j</sub>), 8.82 (s, 1H, m<sub>n</sub>), 7.92 – 7.83 (m, 3H, m<sub>n</sub>), 7.78 – 7.72 (m, 1H, m<sub>n</sub>), 7.71 – 7.64 (m, 1H, m<sub>n</sub>), 7.58 – 7.50 (m, 3H, m<sub>n</sub>), 7.45 – 7.39 (m, 1H, m<sub>n</sub>), 7.25 (d, *J* = 8.4 Hz, 1H, m<sub>j</sub>), 7.19 (t, *J* = 7.7 Hz, 1H, m<sub>j</sub>), 7.14 (d, *J* = 7.4 Hz, 1H, m<sub>n</sub>), 6.98 (t, *J* = 7.5 Hz, 1H, m<sub>n</sub>), 6.92 (d, *J* = 7.7 Hz, 1H, m<sub>j</sub>), 6.84 (t, *J* = 7.5 Hz, 1H, m<sub>j</sub>), 6.76 (d, *J* = 7.7 Hz, 1H, m<sub>n</sub>), 6.49 (d, *J* = 7.5 Hz, 1H, m<sub>j</sub>), 4.04 – 3.96 (m, 1H, m<sub>j</sub>), 3.93 (d, *J* = 3.6 Hz, 1H, m<sub>j</sub>), 3.79 (d, *J* = 3.6 Hz, 1H, m<sub>n</sub>), 3.76 – 3.69 (m, 1H, m<sub>n</sub>), 1.75 (d, *J* = 7.1 Hz, 3H, m<sub>n</sub>), 1.31 (d, *J* = 7.0 Hz, 3H, m<sub>j</sub>). <sup>13</sup>C{<sup>1</sup>H} NMR (101 MHz, CDCl<sub>3</sub>) δ 179.9, 179.4, 142.2, 141.9, 140.4, 139.8, 133.4, 133.3, 132.5, 132.4, 128.3, 128.2, 128.1, 128.0, 127.9, 127.7, 127.6, 127.5, 127.0, 126.9, 126.7, 126.3, 126.2, 126.1, 125.9, 125.8, 125.5, 125.2, 125.1, 122.0, 109.9, 52.9, 52.5, 42.1, 39.6, 19.4, 13.5.

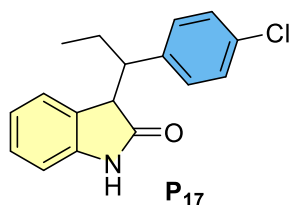

**3-(1-(4-chlorophenyl)propyl)indolin-2-one (P<sub>17</sub>):** The crude product was purified by column chromatography (hexane/EtOAc 8:2 as eluent) to give pure product **P<sub>17</sub>** as a yellowish solid (0.066 g, 78%). Two isomers ratio 1.5:1. <sup>1</sup>H NMR (400 MHz, CDCl<sub>3</sub>) (m<sub>j</sub>: major isomer, m<sub>n</sub>: minor isomer) δ 9.10 (m<sub>n</sub>), 8.83 (m<sub>j</sub>) (two s, 1H), 7.19 – 7.02 (m, 3H, m<sub>n</sub>), 6.98 – 6.80 (m, 3H, m<sub>n</sub>), 6.78 – 6.64 (m, 2H, m<sub>j</sub>), 3.62 (m<sub>j</sub>), 3.56 (m<sub>n</sub>) (two d, *J* = 3.5 Hz, 1H), 3.29 – 3.16 (m, 1H, m<sub>n</sub>), 2.13 – 1.67

(m, 2H), 0.84 (m<sub>j</sub>), 0.76 (m<sub>n</sub>) (two t,  $J = 7.3$  Hz, 3H).  $^{13}\text{C}\{^1\text{H}\}$  NMR (101 MHz,  $\text{CDCl}_3$ )  $\delta$  179.6, 179.5, 142.0, 141.8, 139.1, 138.4, 132.5, 132.4, 130.0, 129.9, 128.4, 128.3, 128.1, 128.0, 127.8, 127.5, 125.2, 124.7, 122.1, 122.0, 110.0, 109.9, 52.2, 51.3, 48.6, 48.1, 26.4, 22.7, 12.5, 12.4. HRMS (ESI-TOF)  $m/z$ :  $[\text{M} + \text{H}]^+$  Calcd for  $[\text{C}_{17}\text{H}_{17}\text{ClNO}]$  286.0999; Found 286.0982.

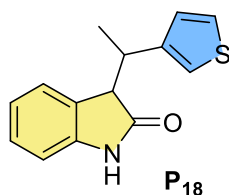

**3-(1-(thiophen-3-yl)ethyl)indolin-2-one (P<sub>18</sub>):** The crude product was purified by column chromatography (hexane/EtOAc 8:2 as eluent) to give pure product **P<sub>18</sub>** as a yellowish oil (0.054 g, 74%). Two isomers ratio 2.32:1.  $^1\text{H}$  NMR (400 MHz,  $\text{CDCl}_3$ ) (m<sub>j</sub>: major isomer, m<sub>n</sub>: minor isomer)  $\delta$  9.24 (s, 1H, m<sub>j</sub>), 8.90 (s, 1H, m<sub>n</sub>), 7.27 – 7.24 (m, 1H, m<sub>j</sub>), 7.13 – 7.06 (m, 2H, m<sub>j</sub>), 7.02 (d,  $J = 4.6$  Hz, 1H, m<sub>n</sub>), 6.97 (d,  $J = 4.8$  Hz, 1H, m<sub>n</sub>), 6.91 (d,  $J = 4.6$  Hz, 1H, m<sub>j</sub>), 6.79 (dd,  $J = 16.3, 7.6$  Hz, 2H, m<sub>j</sub>), 6.69 (dd,  $J = 15.9, 6.3$  Hz, 1H, m<sub>n</sub>), 6.37 (d,  $J = 7.4$  Hz, 1H, m<sub>j</sub>), 3.79 – 3.70 (m, 2H, m<sub>j</sub>), 3.68 – 3.60 (m, 1H, m<sub>n</sub>), 3.55 (d,  $J = 4.6$  Hz, 1H, m<sub>n</sub>), 1.52 (d,  $J = 7.2$  Hz, 3H, m<sub>n</sub>), 1.07 (d,  $J = 6.8$  Hz, 3H, m<sub>j</sub>).  $^{13}\text{C}\{^1\text{H}\}$  NMR (101 MHz,  $\text{CDCl}_3$ )  $\delta$  179.8, 179.6, 144.4, 142.8, 142.2, 142.0, 128.2, 128.1, 128.1, 127.5, 127.3, 127.0, 125.9, 125.0, 124.9, 124.8, 122.1, 122.0, 121.3, 121.0, 109.9, 109.8, 52.5, 52.4, 37.3, 35.7, 19.6, 14.2. HRMS (ESI-TOF)  $m/z$ :  $[\text{M} + \text{H}]^+$  Calcd for  $[\text{C}_{14}\text{H}_{14}\text{NOS}]$  244.0796; Found 244.0784.

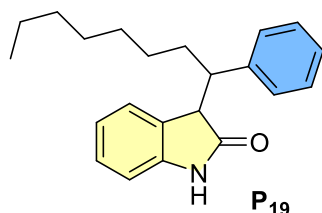

**3-(1-phenyloctyl)indolin-2-one (P<sub>19</sub>):** The crude product was purified by column chromatography (hexane/EtOAc 8:2 as eluent) to give pure product **P<sub>19</sub>** as a pale yellowish oil (0.068 g, 71%). Two isomers ratio 1.47:1.  $^1\text{H}$  NMR (400 MHz,  $\text{CDCl}_3$ ) (m<sub>j</sub>: major isomer, m<sub>n</sub>: minor isomer)  $\delta$  8.34 (s, 1H, m<sub>n</sub>), 7.99 (s, 1H, m<sub>j</sub>), 7.24 – 7.12 (m, 3H), 7.08 (t,  $J = 7.5$  Hz, 2H, m<sub>j</sub>), 6.99 (t,  $J = 7.5$  Hz, 1H, m<sub>n</sub>), 6.92 (d,  $J = 6.6$  Hz, 1H, m<sub>n</sub>), 6.88 (d,  $J = 8.0$  Hz, 2H, m<sub>j</sub>), 6.81 (d,  $J = 8.0$  Hz, 2H, m<sub>j</sub>), 6.78 (d,  $J = 7.8$  Hz, 1H, m<sub>n</sub>), 6.70 (d,  $J = 7.7$  Hz, 1H, m<sub>j</sub>), 3.68 (d,  $J = 4.8$  Hz, 1H, m<sub>j</sub>), 3.65 (d,  $J = 3.4$  Hz, 1H, m<sub>n</sub>), 3.49 – 3.43 (m, 1H, m<sub>n</sub>), 3.38 – 3.31 (m, 1H, m<sub>j</sub>), 2.12 – 1.99 (m, 2H, m<sub>j</sub>), 1.85 – 1.72 (m, 1H, m<sub>n</sub>), 1.32 – 1.16 (m, 17H), 0.86 (t,  $J = 6.8$  Hz, 3H, m<sub>j</sub>), 0.82 (t,  $J = 7.1$  Hz, 3H, m<sub>n</sub>).  $^{13}\text{C}\{^1\text{H}\}$  NMR (101 MHz,  $\text{CDCl}_3$ )  $\delta$  179.3, 179.2, 141.9, 141.7, 138.0, 137.2, 136.2, 129.0, 128.7, 128.6, 128.5, 128.2, 128.1, 128.0, 127.8, 125.4, 125.1, 122.0, 109.6, 109.5, 52.8, 51.6, 47.2, 46.3, 33.5, 32.0, 31.9, 29.7, 29.6, 29.3, 29.3, 27.8, 27.8, 22.8, 22.7, 21.2, 21.1, 14.2. HRMS (ESI-TOF)  $m/z$ :  $[\text{M} + \text{H}]^+$  Calcd for  $[\text{C}_{22}\text{H}_{28}\text{NO}]$  322.2171; Found 322.2178.

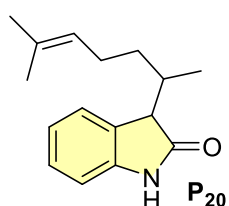

**3-(6-methylhept-5-en-2-yl)indolin-2-one (P<sub>20</sub>):** The crude product was purified by column chromatography (hexane/EtOAc 8:2 as eluent) to give pure product **P<sub>20</sub>** as a colorless oil (0.055 g, 77%). Two isomers ratio 1.11:1. <sup>1</sup>H NMR (400 MHz, CDCl<sub>3</sub>) (m<sub>j</sub>: major isomer, m<sub>n</sub>: minor isomer) δ 8.97 (s, 1H, m<sub>j</sub>), 8.87 (s, 1H, m<sub>n</sub>), 7.17 – 7.10 (m, 4H), 6.93 (t, *J* = 7.5 Hz, 2H), 6.83 (t, *J* = 7.4 Hz, 2H), 5.07 (t, *J* = 7.0 Hz, 1H, m<sub>j</sub>), 5.00 (t, *J* = 7.0 Hz, 1H, m<sub>n</sub>), 3.42 (d, *J* = 3.0 Hz, 1H, m<sub>j</sub>), 3.39 (d, *J* = 2.8 Hz, 1H, m<sub>n</sub>), 2.34 – 2.19 (m, 2H), 2.10 – 1.90 (m, 4H), 1.63 (s, 3H, m<sub>j</sub>), 1.59 (s, 3H, m<sub>n</sub>), 1.54 (s, 3H, m<sub>j</sub>), 1.50 (s, 3H, m<sub>n</sub>), 1.33 – 1.03 (m, 4H), 0.95 (d, *J* = 6.9 Hz, 3H, m<sub>n</sub>), 0.72 (d, *J* = 6.8 Hz, 3H, m<sub>j</sub>). <sup>13</sup>C{<sup>1</sup>H} NMR (101 MHz, CDCl<sub>3</sub>) δ 180.7, 180.1, 142.3, 142.1, 132.1, 131.7, 129.1, 128.0, 127.9, 127.8, 124.9, 124.4, 124.3, 124.1, 122.2, 122.1, 109.8, 109.7, 51.3, 51.1, 35.4, 35.2, 34.7, 32.9, 26.2, 26.0, 25.9, 25.8, 17.8, 17.7, 16.9, 15.2. HRMS (ESI-TOF) *m/z*: [M + H]<sup>+</sup> Calcd for [C<sub>16</sub>H<sub>22</sub>NO] 244.1701; Found 244.1710.

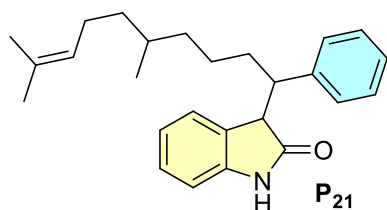

**3-(5,9-dimethyl-1-phenyldec-8-en-1-yl)indolin-2-one (P<sub>21</sub>):** The crude product was purified by column chromatography (hexane/EtOAc 8:2 as eluent) to give pure product **P<sub>21</sub>** as a yellowish oil (0.077 g, 68%). Two isomers ratio 1.47:1. <sup>1</sup>H NMR (400 MHz, CDCl<sub>3</sub>) (m<sub>j</sub>: major isomer, m<sub>n</sub>: minor isomer) δ 8.48 (brs, 1H, m<sub>n</sub>), 8.16 (brs, 1H, m<sub>j</sub>), 7.25 – 7.13 (m, 6H), 7.10 – 7.04 (m, 3H), 7.03 – 6.96 (m, 1H), 6.95 – 6.90 (m, 3H), 6.78 (d, *J* = 7.7 Hz, 1H, m<sub>n</sub>), 6.70 (d, *J* = 7.7 Hz, 1H, m<sub>j</sub>), 5.21 – 4.94 (m, 2H), 3.70 (d, *J* = 4.8 Hz, 1H, m<sub>j</sub>), 3.67 (d, *J* = 4.8 Hz, 1H, m<sub>n</sub>), 3.53 – 3.47 (m, 1H, m<sub>n</sub>), 3.42 – 3.35 (m, 1H, m<sub>j</sub>), 2.13 – 2.01 (m, 2H, m<sub>n</sub>), 1.98 – 1.84 (m, 4H, m<sub>j</sub>), 1.67 (s, 3H, m<sub>j</sub>), 1.66 (s, 3H, m<sub>n</sub>), 1.58 (s, 3H, m<sub>j</sub>), 1.56 (s, 3H, m<sub>n</sub>), 1.38 – 1.18 (m, 9H, m<sub>j</sub>), 1.14 – 1.02 (m, 2H, m<sub>n</sub>), 0.81 (t, *J* = 7.7 Hz, 3H, m<sub>j</sub>), 0.76 (t, *J* = 7.7 Hz, 3H, m<sub>n</sub>). <sup>13</sup>C{<sup>1</sup>H} NMR (101 MHz, CDCl<sub>3</sub>) δ 179.4, 179.3, 141.9, 141.7, 141.1, 141.0, 140.3, 131.2, 131.1, 128.8, 128.7, 128.6, 128.3, 128.2, 128.1, 128.0, 127.9, 126.8, 126.7, 125.4, 125.2, 125.1, 125.0, 122.0, 109.7, 109.6, 52.7, 52.6, 51.6, 51.5, 47.6, 46.7, 37.3, 37.2, 37.0, 36.9, 33.7, 32.4, 25.8, 25.6, 25.6, 25.2, 19.7, 19.6, 19.6, 19.5, 17.8, 17.7. HRMS (ESI-TOF) *m/z*: [M + Na]<sup>+</sup> Calcd for [C<sub>26</sub>H<sub>33</sub>NNaO] 398.2460; Found 398.2462.

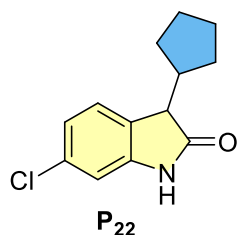

**6-chloro-3-cyclopentylindolin-2-one (P<sub>22</sub>):**<sup>2</sup> The crude product was purified by column chromatography (hexane/EtOAc 8:2 as eluent) to give pure product **P<sub>22</sub>** as a colourless solid (0.056 g, 79%). <sup>1</sup>H NMR (400 MHz, CDCl<sub>3</sub>) δ 9.39 (s, 1H), 7.17 (d, *J* = 7.9 Hz, 1H), 6.97 (d, *J* = 8.0 Hz, 1H), 6.93 (s, 1H), 3.49 (d, *J* = 5.3 Hz, 1H), 2.56 – 2.29 (m, 1H), 1.97 – 1.88 (m, 1H), 1.78 – 1.69 (m, 1H), 1.67 – 1.48 (m, 5H), 1.35 – 1.23 (m, 1H). <sup>13</sup>C{<sup>1</sup>H} NMR (101 MHz, CDCl<sub>3</sub>) δ 180.8, 143.2, 133.6, 127.6, 125.7, 122.1, 110.5, 49.0, 41.9, 30.0, 28.4, 25.2, 25.1.

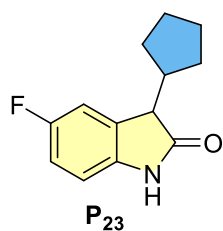

**3-cyclopentyl-5-fluoroindolin-2-one (P<sub>23</sub>):**<sup>2</sup> The crude product was purified by column chromatography (hexane/EtOAc 8:2 as eluent) to give pure product **P<sub>23</sub>** as a yellowish brown solid (0.047 g, 71%). <sup>1</sup>H NMR (400 MHz, CDCl<sub>3</sub>) δ 9.54 (brs, 1H), 7.01 (d, *J* = 8.3 Hz, 1H), 6.94 – 6.80 (m, 2H), 3.52 (d, *J* = 5.2 Hz, 1H), 2.53 – 2.36 (m, 1H), 1.98 – 1.86 (m, 1H), 1.79 – 1.71 (m, 1H), 1.69 – 1.47 (m, 5H), 1.37 – 1.24 (m, 1H). <sup>13</sup>C{<sup>1</sup>H} NMR (101 MHz, CDCl<sub>3</sub>) δ 180.8, 160.1, 157.7, 138.1, 130.9, 130.8, 114.3, 114.1, 112.8, 112.6, 110.3, 110.2, 49.8, 41.9, 29.9, 28.4, 25.2, 25.1. <sup>19</sup>F{<sup>1</sup>H} NMR (377 MHz, CDCl<sub>3</sub>) δ -121.26.

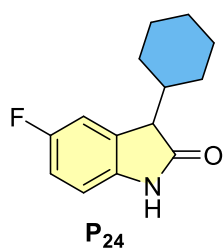

**3-cyclohexyl-5-fluoroindolin-2-one (P<sub>24</sub>):**<sup>3</sup> The crude product was purified by column chromatography (hexane/EtOAc 8:2 as eluent) to give pure product **P<sub>24</sub>** as a brown solid (0.045 g, 65%). <sup>1</sup>H NMR (400 MHz, CDCl<sub>3</sub>) δ 9.03 (s, 1H), 7.00 (d, *J* = 7.8 Hz, 1H), 6.94 – 6.79 (m, 2H), 3.36 (d, *J* = 2.2 Hz, 1H), 2.18 – 2.06 (m, 1H), 1.80 – 1.52 (m, 5H), 1.45 – 1.09 (m, 5H). <sup>13</sup>C{<sup>1</sup>H} NMR (101 MHz, CDCl<sub>3</sub>) δ 180.2, 160.1, 157.8, 138.0, 130.4, 130.4, 114.2, 114.0, 112.9, 112.6, 110.2, 110.1, 52.7, 41.0, 30.4, 28.4, 26.7, 26.4, 26.1. <sup>19</sup>F{<sup>1</sup>H} NMR (377 MHz, CDCl<sub>3</sub>) δ -121.14.

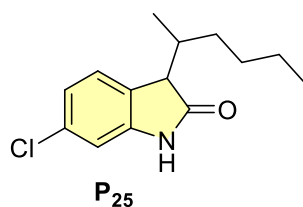

**6-chloro-3-(hexan-2-yl)indolin-2-one (P<sub>25</sub>):** The crude product was purified by column chromatography (hexane/EtOAc 8:2 as eluent) to give pure product **P<sub>25</sub>** as a pale yellow oil (0.056 g, 74%). Two isomers ratio 1.55:1. <sup>1</sup>H NMR (400 MHz, CDCl<sub>3</sub>) (m<sub>j</sub>: major isomer, m<sub>n</sub>: minor isomer) δ 9.50 (m<sub>j</sub>), 9.43 (m<sub>n</sub>) (two s, 1H), 7.17 – 7.12 (m, 1H), 7.03 – 6.93 (m, 2H), 3.48 (m<sub>j</sub>), 3.45 (m<sub>n</sub>) (two d, *J* = 2.9 Hz, 1H), 2.42 – 2.20 (m, 1H), 1.58 – 1.25 (m, 6H), 1.02 (m<sub>n</sub>), 0.94 (m<sub>j</sub>) (one d, *J* = 6.9 Hz, one t, *J* = 6.9 Hz, 3H), 0.88 (m<sub>n</sub>), 0.78 (m<sub>j</sub>) (one t, *J* = 6.8 Hz, one d, *J* = 6.8 Hz, 2H). <sup>13</sup>C{<sup>1</sup>H} NMR (101 MHz, CDCl<sub>3</sub>) δ 181.1, 180.4, 143.5, 143.3, 133.6, 133.5, 127.5, 126.4, 125.7, 125.2, 122.2, 122.1, 110.6, 110.5, 51.2, 50.7, 35.8, 35.5, 34.2, 32.5, 31.7, 29.9, 22.8, 22.7, 16.9, 15.4, 14.3, 14.2. HRMS (ESI-TOF) *m/z*: [M + H]<sup>+</sup> Calcd for [C<sub>14</sub>H<sub>19</sub>ClNO] 252.1155; Found 252.1152.

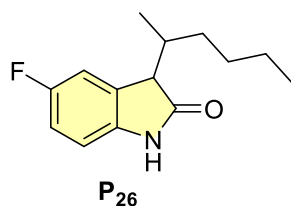

**5-fluoro-3-(hexan-2-yl)indolin-2-one (P<sub>26</sub>):** The crude product was purified by column chromatography (hexane/EtOAc 8:2 as eluent) to give pure product **P<sub>26</sub>** as a brown oil (0.045 g, 64%). <sup>1</sup>H NMR (400 MHz, CDCl<sub>3</sub>) (m<sub>j</sub>: major isomer, m<sub>n</sub>: minor isomer) δ 9.38 (m<sub>j</sub>), 9.28 (m<sub>n</sub>) (two s, 1H), 7.00 – 6.87 (m, 2H), 6.87 – 6.81 (m, 1H), 3.49 (m<sub>j</sub>), 3.45 (m<sub>n</sub>) (two d, *J* = 2.5 Hz, 1H), 2.39 – 2.20 (m, 1H), 1.59 – 1.21 (m, 6H), 1.01 (m<sub>j</sub>), 0.92 (m<sub>n</sub>) (one d, *J* = 7.0 Hz, one t, *J* = 6.9 Hz, 3H), 0.85 (m<sub>n</sub>), 0.77 (m<sub>j</sub>) (one t, *J* = 6.9 Hz, one d, *J* = 6.8 Hz, 3H). <sup>13</sup>C {<sup>1</sup>H} NMR (101 MHz, CDCl<sub>3</sub>) δ 180.9, 180.2, 160.2, 160.1, 157.8, 157.7, 138.3, 138.0, 130.8, 130.8, 129.7, 129.6, 114.3, 114.2, 114.1, 114.0, 113.0, 112.7, 112.4, 112.2, 110.3, 110.2, 110.1, 52.0, 51.5, 35.9, 35.5, 34.2, 32.5, 29.9, 29.8, 22.8, 16.9, 15.4, 14.2. <sup>19</sup>F {<sup>1</sup>H} NMR (377 MHz, CDCl<sub>3</sub>) δ -121.20 (m<sub>j</sub>), -121.24 (m<sub>n</sub>). HRMS (ESI-TOF) *m/z*: [M + H]<sup>+</sup> Calcd for [C<sub>14</sub>H<sub>19</sub>FNO] 236.1451; Found 236.1460.

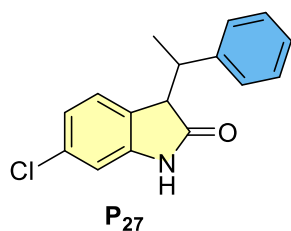

**6-chloro-3-(1-phenylethyl)indolin-2-one (P<sub>27</sub>):** The crude product was purified by column chromatography (hexane/EtOAc 8:2 as eluent) to give pure product **P<sub>27</sub>** as a pale yellow solid (0.050 g, 62%). Two isomers ratio 2.32:1. <sup>1</sup>H NMR (400 MHz, CDCl<sub>3</sub>) (m<sub>j</sub>: major isomer, m<sub>n</sub>: minor isomer) δ 8.86 (brs, 1H, m<sub>j</sub>), 8.51 (brs, 1H, m<sub>n</sub>), 7.41 – 7.35 (m, 2H, m<sub>j</sub>), 7.34 – 7.29 (m, 3H, m<sub>j</sub>), 7.22 – 7.16 (m, 1H, m<sub>n</sub>), 7.11 – 7.06 (m, 1H, m<sub>n</sub>), 6.94 (d, *J* = 8.1 Hz, 1H, m<sub>n</sub>), 6.91 (d, *J* = 1.7 Hz, 1H, m<sub>j</sub>), 6.86 (d, *J* = 8.0 Hz, 1H, m<sub>j</sub>), 6.80 (d, *J* = 1.3 Hz, 1H, m<sub>n</sub>), 6.41 (d, *J* = 8.0 Hz, 1H, m<sub>j</sub>), 3.85 – 3.78 (m, 1H, m<sub>j</sub>), 3.76 (d, *J* = 3.7 Hz, 1H, m<sub>j</sub>), 3.64 (d, *J* = 5.8 Hz, 1H, m<sub>n</sub>), 3.53 – 3.44 (m, 1H, m<sub>n</sub>), 1.65 (d, *J* = 7.2 Hz, 3H, m<sub>n</sub>), 1.21 (d, *J* = 7.0 Hz, 3H, m<sub>j</sub>). <sup>13</sup>C {<sup>1</sup>H} NMR (101 MHz, CDCl<sub>3</sub>) δ 179.5, 179.1, 143.2, 142.8, 142.5, 141.9, 133.8, 128.6, 128.3, 128.0, 127.9, 127.1, 127.0, 126.6, 126.2, 126.1, 125.4, 122.0, 121.9, 110.3, 52.7, 52.2, 41.9, 39.6, 19.4, 13.5. HRMS (ESI-TOF) *m/z*: [M + H]<sup>+</sup> Calcd for [C<sub>16</sub>H<sub>15</sub>ClNO] 272.0842; Found 272.0852.

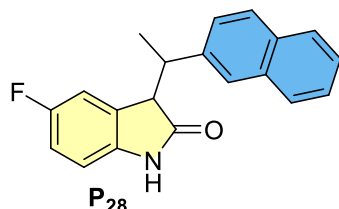

**5-fluoro-3-(1-(naphthalen-2-yl)ethyl)indolin-2-one (P<sub>28</sub>):** The crude product was purified by column chromatography (hexane/EtOAc 8:2 as eluent) to give pure product **P<sub>28</sub>** as a pale yellow oil (0.055 g, 60%). <sup>1</sup>H NMR (400 MHz, CDCl<sub>3</sub>) (m<sub>j</sub>: major isomer, m<sub>n</sub>: minor isomer) δ 9.20 (s, 1H, m<sub>j</sub>), 8.76 (s, 1H, m<sub>n</sub>), 7.89 – 7.79 (m, 3H), 7.76 – 7.69 (m, 1H), 7.65 (t, *J* = 8.2 Hz, 1H), 7.54 – 7.46 (m, 3H), 7.44 – 7.36 (m, 1H), 7.20 (d, *J* = 8.4 Hz, 1H), 6.93 – 6.75 (m, 3H), 6.68 –



6.61 (m, 1H), 6.24 (d,  $J = 8.2$  Hz, 1H), 3.99 – 3.90 (m, 1H,  $m_j$ ), 3.88 (d,  $J = 3.1$  Hz, 1H,  $m_j$ ), 3.75 (d,  $J = 5.3$  Hz, 1H,  $m_n$ ), 3.69 (m, 1H,  $m_n$ ), 1.71 (d,  $J = 7.0$  Hz, 3H,  $m_n$ ), 1.29 (d,  $J = 7.0$  Hz, 3H,  $m_j$ ).  $^{13}\text{C}$  NMR (101 MHz,  $\text{CDCl}_3$ )  $\delta$  179.7, 179.2, 159.9, 159.8, 157.5, 157.4, 139.9, 139.2, 138.1, 137.8, 133.4, 133.3, 132.6, 132.5, 129.8, 129.7, 128.7, 128.6, 128.4, 128.0, 127.9, 127.8, 127.7, 127.6, 126.9, 126.5, 126.4, 126.2, 126.1, 126.0, 125.9, 125.7, 114.7, 114.6, 114.4, 114.3, 113.3, 113.2, 113.0, 112.9, 110.3, 110.2, 53.3, 53.0, 41.9, 39.7, 19.3, 13.6.  $^{19}\text{F}\{^1\text{H}\}$  NMR (377 MHz,  $\text{CDCl}_3$ )  $\delta$  -120.70 ( $m_j$ ), -120.98 ( $m_n$ ). HRMS (ESI-TOF)  $m/z$ :  $[\text{M} + \text{Na}]^+$  Calcd for  $[\text{C}_{20}\text{H}_{16}\text{FNONa}]$  328.1114; Found 328.1128.

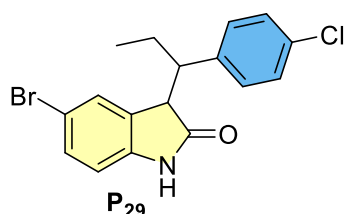

**5-bromo-3-(1-(4-chlorophenyl)propyl)indolin-2-one (P<sub>29</sub>):** The crude product was purified by column chromatography (hexane/EtOAc 8:2 as eluent) to give pure product **P<sub>29</sub>** as a yellow solid (0.068 g, 62%).  $^1\text{H}$  NMR (400 MHz,  $\text{CDCl}_3$ ) ( $m_j$ : major isomer,  $m_n$ : minor isomer)  $\delta$  8.85 ( $m_n$ ), 8.61 ( $m_j$ ) (two s, 1H), 7.43 – 7.28 (m, 2H), 7.23 (d,  $J = 8.4$  Hz, 1H,  $m_n$ ), 7.12 (d,  $J = 8.4$  Hz, 1H,  $m_j$ ), 7.07 (d,  $J = 8.4$  Hz, 1H,  $m_n$ ), 6.86 (d,  $J = 8.4$  Hz, 1H,  $m_j$ ), 6.68 ( $m_n$ ), 6.64 ( $m_j$ ) (two d,  $J = 8.3$  Hz, 1H), 3.72 ( $m_j$ ), 3.67 ( $m_n$ ) (two d,  $J = 3.3$  Hz, 1H), 3.36 – 3.24 (m, 1H), 2.13 – 1.87 (m, 2H), 0.96 ( $m_j$ ), 0.88 ( $m_n$ ) (two t,  $J = 7.3$  Hz, 3H).  $^{13}\text{C}\{^1\text{H}\}$  NMR (101 MHz,  $\text{CDCl}_3$ )  $\delta$  179.3, 178.7, 141.0, 140.7, 138.6, 137.9, 132.8, 132.7, 131.2, 131.0, 130.0, 129.9, 128.6, 128.3, 128.2, 127.8, 114.8, 114.7, 111.4, 111.2, 52.0, 51.4, 48.6, 48.3, 26.3, 23.0, 12.5, 12.4. HRMS (ESI-TOF)  $m/z$ :  $[\text{M} + \text{H}]^+$  Calcd for  $[\text{C}_{17}\text{H}_{16}\text{BrClNO}]$  364.0104; Found 364.0086.

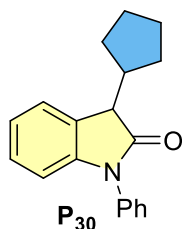

**3-cyclopentyl-1-phenylindolin-2-one (P<sub>30</sub>):**<sup>2</sup> The crude product was purified by column chromatography (hexane/EtOAc 8:2 as eluent) to give pure product **P<sub>30</sub>** as a pale yellow oil (0.068 g, 82%).  $^1\text{H}$  NMR (400 MHz,  $\text{CDCl}_3$ )  $\delta$  7.52 (t,  $J = 7.8$  Hz, 2H), 7.43 – 7.34 (m, 4H), 7.20 (t,  $J = 7.6$  Hz, 1H), 7.06 (t,  $J = 7.5$  Hz, 1H), 6.79 (d,  $J = 7.9$  Hz, 1H), 3.69 (d,  $J = 5.1$  Hz, 1H), 2.64 – 2.52 (m, 1H), 2.00 – 1.87 (m, 1H), 1.85 – 1.77 (m, 1H), 1.70 – 1.53 (m, 5H), 1.46 – 1.36 (m, 1H).  $^{13}\text{C}\{^1\text{H}\}$  NMR (101 MHz,  $\text{CDCl}_3$ )  $\delta$  177.1, 144.7, 134.7, 129.7, 128.4, 128.1, 127.8, 126.8, 124.9, 122.6, 109.2, 48.8, 42.6, 29.9, 28.2, 25.2, 25.1.

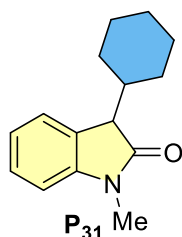



**3-cyclohexyl-1-methylindolin-2-one (P<sub>31</sub>):**<sup>1</sup> The crude product was purified by column chromatography (hexane/EtOAc 8:2 as eluent) to give pure product **P<sub>31</sub>** as a yellowish brown oil (0.040 g, 58%). <sup>1</sup>H NMR (400 MHz, CDCl<sub>3</sub>) δ 7.29 (t, *J* = 6.0 Hz, 1H), 7.06 (t, *J* = 7.5 Hz, 1H), 6.83 (d, *J* = 8.0 Hz, 1H), 3.36 (d, *J* = 3.2 Hz, 1H), 3.21 (s, 1H), 2.23 – 2.12 (m, 1H), 1.81 – 1.64 (m, 2H), 1.50 – 1.38 (m, 1H), 1.33 – 1.24 (m, 1H), 1.17 – 1.09 (m, 1H). <sup>13</sup>C{<sup>1</sup>H} NMR (101 MHz, CDCl<sub>3</sub>) δ 177.6, 144.8, 128.2, 127.8, 124.5, 122.2, 107.9, 51.6, 41.1, 30.5, 28.4, 26.8, 26.4, 26.2, 26.1.

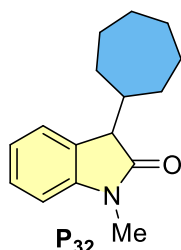

**3-cycloheptyl-1-methylindolin-2-one (P<sub>32</sub>):** The crude product was purified by column chromatography (hexane/EtOAc 8:2 as eluent) to give pure product **P<sub>32</sub>** as a pale yellow oil (0.038 g, 52%). <sup>1</sup>H NMR (400 MHz, CDCl<sub>3</sub>) δ 7.22 (d, *J* = 7.3 Hz, 1H), 7.19 (t, *J* = 3.8 Hz, 1H), 6.96 (t, *J* = 7.5 Hz, 1H), 6.74 (d, *J* = 7.7 Hz, 1H), 3.34 (d, *J* = 3.0 Hz, 1H), 3.12 (s, 3H), 2.31 – 2.20 (m, 1H), 1.71 – 1.63 (m, 2H), 1.59 – 1.47 (m, 5H), 1.41 – 1.32 (m, 5H). <sup>13</sup>C{<sup>1</sup>H} NMR (101 MHz, CDCl<sub>3</sub>) δ 177.6, 144.9, 128.3, 127.9, 124.4, 122.2, 107.9, 52.8, 42.4, 32.8, 30.5, 27.9, 27.6, 27.4, 27.1, 26.2. HRMS (ESI-TOF) *m/z*: [M + H]<sup>+</sup> Calcd for [C<sub>16</sub>H<sub>22</sub>NO] 244.1701; Found 244.1693.

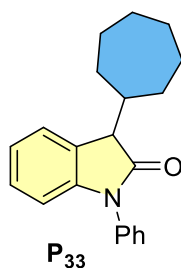

**3-cycloheptyl-1-phenylindolin-2-one (P<sub>33</sub>):** The crude product was purified by column chromatography (hexane/EtOAc 8:2 as eluent) to give pure product **P<sub>33</sub>** as a colourless solid (0.064 g, 70%). <sup>1</sup>H NMR (400 MHz, CDCl<sub>3</sub>) δ 7.52 (t, *J* = 7.7 Hz, 2H), 7.43 – 7.33 (m, 4H), 7.19 (t, *J* = 7.7 Hz, 1H), 7.07 (t, *J* = 7.4 Hz, 1H), 6.79 (d, *J* = 7.8 Hz, 1H), 3.59 (d, *J* = 3.0 Hz, 1H), 2.48 – 2.34 (m, 1H), 1.87 – 1.76 (m, 2H), 1.66 – 1.58 (m, 5H), 1.51 – 1.40 (m, 5H). <sup>13</sup>C{<sup>1</sup>H} NMR (101 MHz, CDCl<sub>3</sub>) δ 177.0, 144.8, 134.8, 129.7, 128.2, 128.1, 127.7, 126.8, 124.6, 122.7, 109.2, 52.7, 43.0, 32.6, 30.6, 28.0, 27.5, 27.4, 27.1. HRMS (ESI-TOF) *m/z*: [M]<sup>+</sup> Calcd for [C<sub>21</sub>H<sub>23</sub>NO] 305.1780; Found 305.1769.

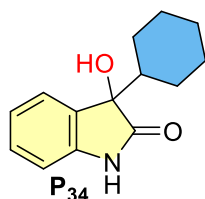

**3-cyclohexyl-3-hydroxyindolin-2-one (P<sub>34</sub>):** The crude product was purified by column chromatography (hexane/EtOAc 7:3 as eluent) to give pure product **P<sub>34</sub>** as a white solid (0.057 g, 82%). <sup>1</sup>H NMR (400 MHz, DMSO-*d*<sub>6</sub>) δ 10.18 (s, 1H), 7.23 – 7.12 (m, 2H), 6.93 (t, *J* = 7.4 Hz, 1H), 6.77 (d, *J* = 7.7 Hz, 1H), 5.73 (s, 1H), 1.90 – 1.82 (m, 1H), 1.79 – 1.67 (m, 2H), 1.60 – 1.46 (m, 3H), 1.18 – 1.04 (m, 3H), 1.01 – 0.89 (m, 1H), 0.69 – 0.55 (m, 1H). <sup>13</sup>C NMR (101 MHz, DMSO-*d*<sub>6</sub>) δ 179.6, 142.2, 131.2, 128.7, 124.6, 121.3, 109.3, 78.2, 45.1, 26.1, 26.0, 25.8, 25.6, 25.4. HRMS (ESI-TOF) *m/z*: [M – H<sub>2</sub>O]<sup>+</sup> Calcd for [C<sub>14</sub>H<sub>16</sub>NO] 214.1232; Found 214.1242.

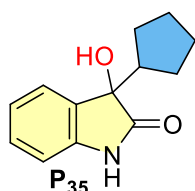

**3-cyclopentyl-3-hydroxyindolin-2-one (P<sub>35</sub>):** The crude product was purified by column chromatography (hexane/EtOAc 7:3 as eluent) to give pure product **P<sub>35</sub>** as a white solid (0.049 g, 75%). <sup>1</sup>H NMR (400 MHz, CDCl<sub>3</sub>) δ 8.45 (s, 1H), 7.41 (d, *J* = 7.4 Hz, 1H), 7.29 – 7.24 (m, 1H), 7.07 (t, *J* = 7.5 Hz, 1H), 6.89 (d, *J* = 7.7 Hz, 1H), 3.35 (s, 1H), 2.48 (m, 1H), 1.84 – 1.76 (m, 1H), 1.72 – 1.63 (m, 1H), 1.58 – 1.47 (m, 2H). <sup>13</sup>C NMR (101 MHz, CDCl<sub>3</sub>) δ 181.1, 140.8, 130.2, 129.6, 125.0, 123.0, 110.3, 78.7, 47.6, 26.6, 26.5, 25.6, 25.5. HRMS (ESI-TOF) *m/z*: [M – H<sub>2</sub>O]<sup>+</sup> Calcd for [C<sub>13</sub>H<sub>14</sub>NO] 200.1075; Found 200.1078.

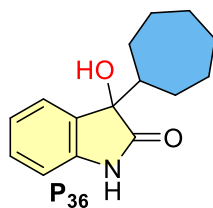

**3-cycloheptyl-3-hydroxyindolin-2-one (P<sub>36</sub>):** The crude product was purified by column chromatography (hexane/EtOAc 7:3 as eluent) to give pure product **P<sub>36</sub>** as a white solid (0.056 g, 77%). <sup>1</sup>H NMR (400 MHz, DMSO-*d*<sub>6</sub>) δ 10.22 (s, 1H), 7.25 – 7.16 (m, 2H), 6.93 (t, *J* = 7.4 Hz, 1H), 6.78 (d, *J* = 7.6 Hz, 1H), 5.79 (s, 1H), 2.13 – 2.05 (m, 1H), 1.94 – 1.86 (m, 1H), 1.76 – 1.68 (m, 1H), 1.58 – 1.27 (m, 10H). <sup>13</sup>C NMR (101 MHz, DMSO-*d*<sub>6</sub>) δ 179.7, 142.3, 131.0, 128.8, 124.6, 121.4, 109.4, 78.1, 46.0, 28.0, 27.9, 27.4, 26.9, 26.6, 26.5. HRMS (ESI-TOF) *m/z*: [M – H<sub>2</sub>O]<sup>+</sup> Calcd for [C<sub>15</sub>H<sub>18</sub>NO] 228.1388; Found 228.1398.

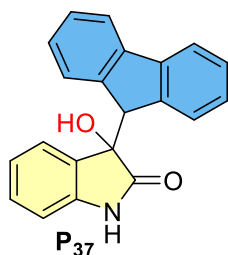

**3-(9H-fluoren-9-yl)-3-hydroxyindolin-2-one (P<sub>37</sub>):** The crude product was purified by column chromatography (hexane/EtOAc 7:3 as eluent) to give pure product **P<sub>37</sub>** as a pale brown solid (0.077 g, 82%). <sup>1</sup>H NMR (400 MHz, DMSO-*d*<sub>6</sub>) δ 10.45 (s, 1H), 7.98 (d, *J* = 6.7 Hz, 1H), 7.82 (d, *J* = 7.5 Hz, 1H), 7.65 (d, *J* = 7.4 Hz, 1H), 7.47 (t, *J* = 7.4 Hz, 1H), 7.38 (t, *J* = 6.9 Hz,

2H), 7.21 (t,  $J = 7.3$  Hz, 1H), 7.13 (t,  $J = 7.4$  Hz, 1H), 6.90 (t,  $J = 7.6$  Hz, 1H), 6.68 (s, 1H), 6.54 (d,  $J = 7.7$  Hz, 1H), 6.41 (t,  $J = 7.5$  Hz, 1H), 5.79 (d,  $J = 6.9$  Hz, 1H), 4.44 (s, 1H).  $^{13}\text{C}\{^1\text{H}\}$  NMR (101 MHz, DMSO- $d_6$ )  $\delta$  178.5, 143.1, 141.7, 141.6, 141.3, 140.6, 129.0, 128.7, 127.8, 127.5, 127.4, 126.6, 126.5, 124.4, 123.4, 120.8, 109.2, 77.5, 52.5. HRMS (ESI-TOF)  $m/z$ :  $[\text{M} - \text{H}_2\text{O}]^+$  Calcd for  $[\text{C}_{21}\text{H}_{14}\text{NO}]$  296.1075; Found 296.1060.

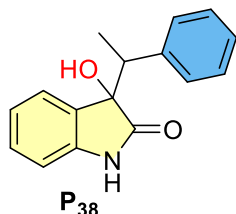

**3-hydroxy-3-(1-phenylethyl)indolin-2-one (P<sub>38</sub>):** The crude product was purified by column chromatography (hexane/EtOAc 7:3 as eluent) to give pure product **P<sub>38</sub>** as a pale brown solid (0.058 g, 76%).  $^1\text{H}$  NMR (400 MHz, DMSO- $d_6$ ) ( $m_j$ : major isomer,  $m_n$ : minor isomer)  $\delta$  10.19 (s, 1H,  $m_n$ ), 9.83 (s, 1H,  $m_j$ ), 7.34 (d,  $J = 7.3$  Hz, 1H,  $m_j$ ), 7.18 (t,  $J = 6.5$  Hz, 2H,  $m_j$ ), 7.12 (dd,  $J = 13.0, 6.7$  Hz, 2H,  $m_n$ ), 7.04 (dd,  $J = 13.0, 6.7$  Hz, 3H,  $m_j$ ), 6.96 (t,  $J = 7.5$  Hz, 1H,  $m_n$ ), 6.81 (t,  $J = 7.5$  Hz, 1H,  $m_n$ ), 6.72 (d,  $J = 6.8$  Hz, 2H,  $m_j$ ), 6.67 (d,  $J = 7.7$  Hz, 1H,  $m_j$ ), 6.61 (d,  $J = 7.3$  Hz, 1H,  $m_j$ ), 6.55 (d,  $J = 7.7$  Hz, 1H,  $m_j$ ), 6.05 (s, 1H,  $m_j$ ), 5.98 (s, 1H,  $m_n$ ), 3.29 (q,  $J = 7.1$  Hz, 1H,  $m_n$ ), 3.22 (q,  $J = 7.0$  Hz, 1H,  $m_j$ ), 1.47 (d,  $J = 7.1$  Hz, 3H,  $m_j$ ), 1.14 (d,  $J = 7.1$  Hz, 2H,  $m_n$ ).  $^{13}\text{C}\{^1\text{H}\}$  NMR (101 MHz, DMSO- $d_6$ )  $\delta$  179.2, 179.0, 142.1, 142.0, 140.6, 140.3, 130.2, 129.9, 129.4, 129.0, 128.8, 128.4, 127.4, 127.2, 126.5, 126.4, 125.2, 125.0, 121.0, 120.9, 109.2, 109.1, 78.5, 77.9, 46.4, 45.1, 14.6, 13.9. HRMS (ESI-TOF)  $m/z$ :  $[\text{M} - \text{H}_2\text{O}]^+$  Calcd for  $[\text{C}_{16}\text{H}_{14}\text{NO}]$  236.1075; Found 236.1083.

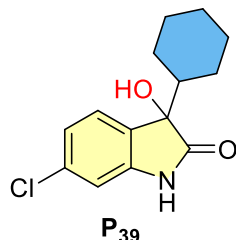

**6-chloro-3-cyclohexyl-3-hydroxyindolin-2-one (P<sub>39</sub>):** The crude product was purified by column chromatography (hexane/EtOAc 7:3 as eluent) to give pure product **P<sub>39</sub>** as a pale brown solid (0.062 g, 78%).  $^1\text{H}$  NMR (400 MHz, DMSO- $d_6$ )  $\delta$  10.36 (s, 1H), 7.22 (d,  $J = 7.9$  Hz, 1H), 6.99 (d,  $J = 9.2$  Hz, 1H), 6.79 (s, 1H), 5.85 (s, 1H), 1.90 – 1.44 (m, 7H), 1.26 – 0.91 (m, 6H).  $^{13}\text{C}\{^1\text{H}\}$  NMR (101 MHz, DMSO- $d_6$ )  $\delta$  179.5, 143.7, 133.0, 130.1, 126.1, 121.0, 109.4, 77.8, 44.9, 26.0, 25.9, 25.8, 25.6, 25.3. HRMS (ESI-TOF)  $m/z$ :  $[\text{M} - \text{H}_2\text{O}]^+$  Calcd for  $[\text{C}_{14}\text{H}_{15}\text{ClNO}]$  248.0842; Found 248.0856.

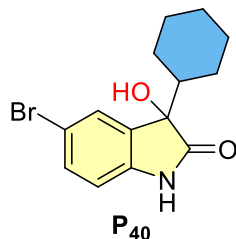

**5-bromo-3-cyclohexyl-3-hydroxyindolin-2-one (P<sub>40</sub>):** The crude product was purified by column chromatography (hexane/EtOAc 7:3 as eluent) to give pure product **P<sub>40</sub>** as pale brown solid (0.075 g, 81%). <sup>1</sup>H NMR (400 MHz, DMSO-*d*<sub>6</sub>) δ 10.47 (s, 1H), 7.44 – 7.28 (m, 2H), 6.76 (d, *J* = 8.2 Hz, 1H), 2.03 – 1.94 (m, 1H), 1.75 – 1.38 (m, 6H), 1.24 – 1.13 (m, 4H). <sup>13</sup>C{<sup>1</sup>H} NMR (101 MHz, DMSO-*d*<sub>6</sub>) δ 177.7, 142.4, 131.3, 130.2, 127.0, 112.9, 110.9, 51.0, 29.1, 28.3, 26.1, 25.9, 25.8. HRMS (ESI-TOF) *m/z*: [M – H<sub>2</sub>O]<sup>+</sup> Calcd for [C<sub>14</sub>H<sub>15</sub>BrNO] 292.0337; Found 292.0347.

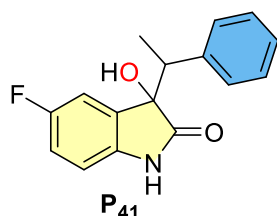

**5-fluoro-3-hydroxy-3-(1-phenylethyl)indolin-2-one (P<sub>41</sub>):** The crude product was purified by column chromatography (hexane/EtOAc 7:3 as eluent) to give pure product **P<sub>41</sub>** as a colourless solid (0.059 g, 78%). <sup>1</sup>H NMR (400 MHz, DMSO-*d*<sub>6</sub>) (*m<sub>j</sub>*: major isomer, *m<sub>n</sub>*: minor isomer) δ 10.23 (s, 1H, *m<sub>n</sub>*), 9.90 (s, 1H, *m<sub>j</sub>*), 7.24 – 7.16 (m, 1H), 7.15 – 7.04 (m, 4H), 7.03 – 6.90 (m, 1H), 6.82 – 6.75 (m, 2H), 6.65 (dd, *J* = 8.4, 4.4 Hz, 1H, *m<sub>n</sub>*), 6.55 (dd, *J* = 8.4, 4.4 Hz, 1H, *m<sub>j</sub>*), 6.46 – 6.41 (m, 1H, *m<sub>n</sub>*), 6.22 (s, 1H, *m<sub>j</sub>*), 6.17 (s, 1H, *m<sub>n</sub>*), 3.31 (q, *J* = 7.1 Hz, 1H, *m<sub>n</sub>*), 3.22 (q, *J* = 7.1 Hz, 1H, *m<sub>j</sub>*), 1.47 (d, *J* = 7.2 Hz, 3H, *m<sub>j</sub>*), 1.18 (d, *J* = 7.2 Hz, 1H, *m<sub>n</sub>*). <sup>13</sup>C{<sup>1</sup>H} NMR (101 MHz, DMSO-*d*<sub>6</sub>) δ 179.2, 158.9, 158.7, 156.5, 156.3, 140.3, 140.0, 138.3, 138.2, 132.3, 132.2, 131.9, 131.8, 129.3, 128.5, 127.6, 127.4, 126.8, 126.7, 115.4, 115.2, 115.1, 115.0, 113.1, 112.9, 112.8, 112.5, 110.0, 109.97, 78.9, 78.2, 46.4, 45.3, 14.4, 13.8. <sup>19</sup>F{<sup>1</sup>H} NMR (377 MHz, DMSO-*d*<sub>6</sub>) δ -122.12 (*m<sub>j</sub>*), -122.18 (*m<sub>n</sub>*). HRMS (ESI-TOF) *m/z*: [M – H<sub>2</sub>O]<sup>+</sup> Calcd for [C<sub>16</sub>H<sub>13</sub>FNO] 254.0981; Found 254.0975.

# $^1\text{H}$ and $^{13}\text{C}$ NMR spectrum:

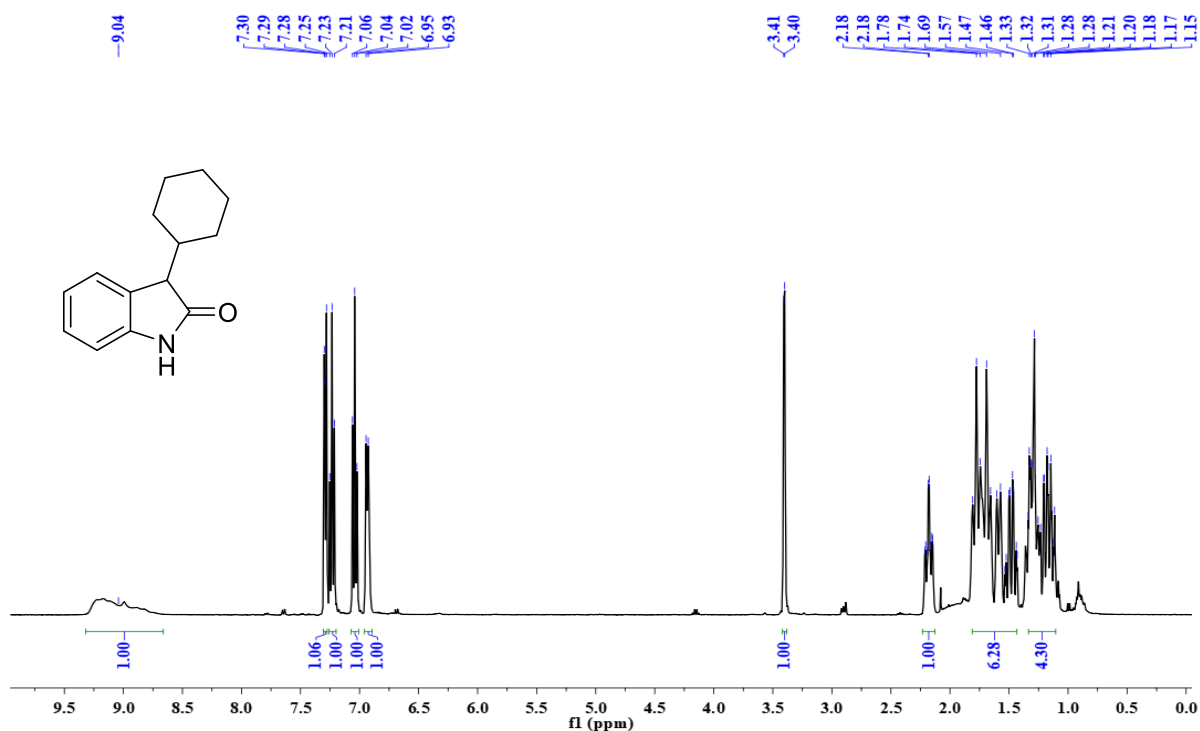

Figure S01.  $^1\text{H}$  NMR (400 MHz,  $\text{CDCl}_3$ ) of 3-cyclohexylindolin-2-one (P1).

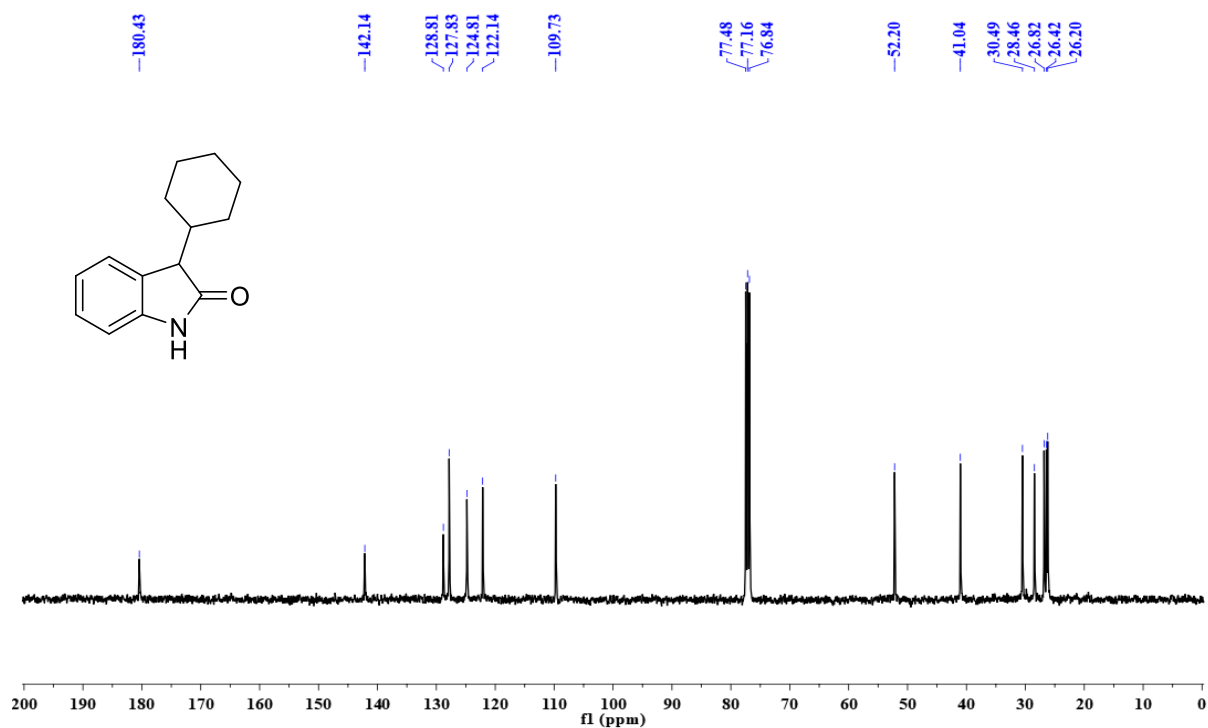

Figure S02.  $^{13}\text{C}\{^1\text{H}\}$  NMR (101 MHz,  $\text{CDCl}_3$ ) of 3-cyclohexylindolin-2-one (P1).

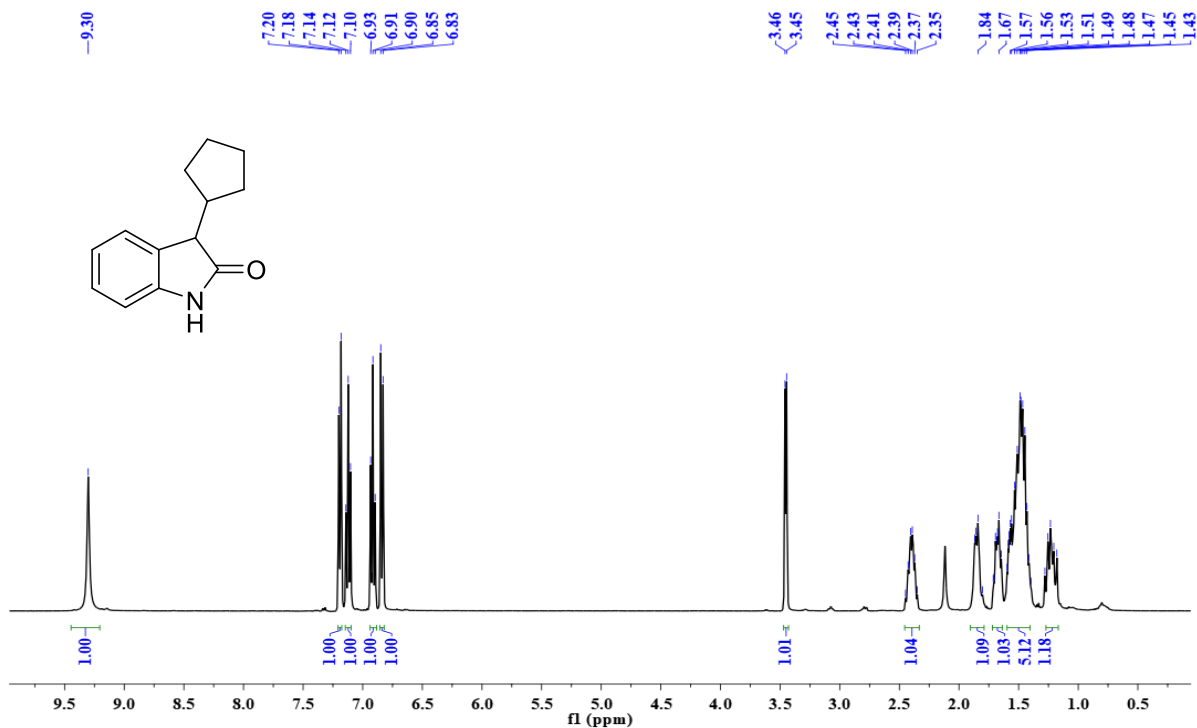

Figure S03. <sup>1</sup>H NMR (400 MHz, CDCl<sub>3</sub>) of 3-cyclopentylindolin-2-one (P<sub>2</sub>).

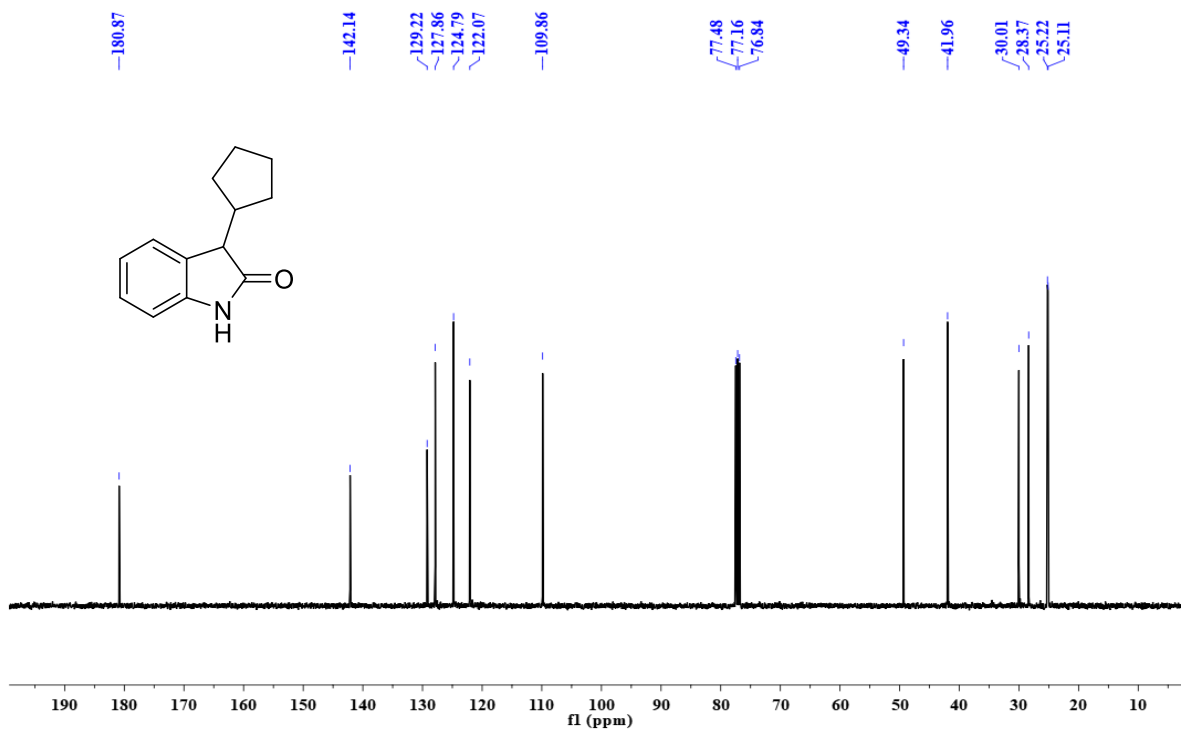

Figure S04. <sup>13</sup>C {<sup>1</sup>H} NMR (101 MHz, CDCl<sub>3</sub>) of 3-cyclopentylindolin-2-one (P<sub>2</sub>).

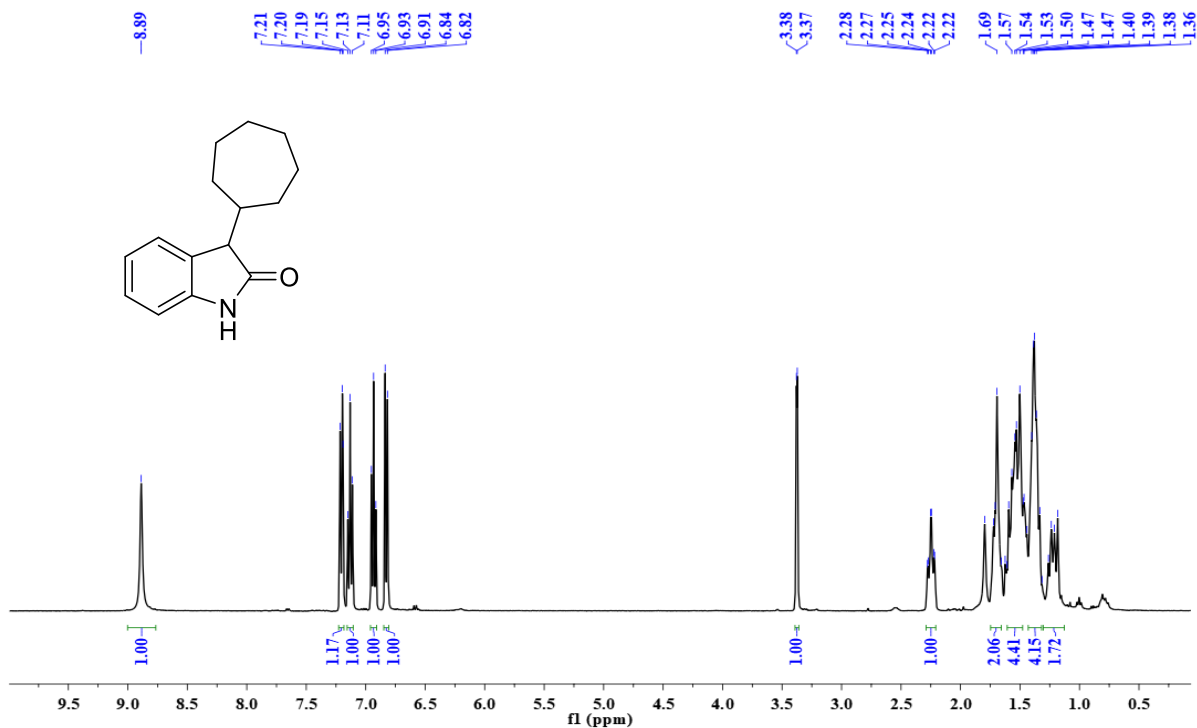

**Figure S05.**  $^1\text{H}$  NMR (400 MHz,  $\text{CDCl}_3$ ) of 3-cycloheptylindolin-2-one (**P3**).

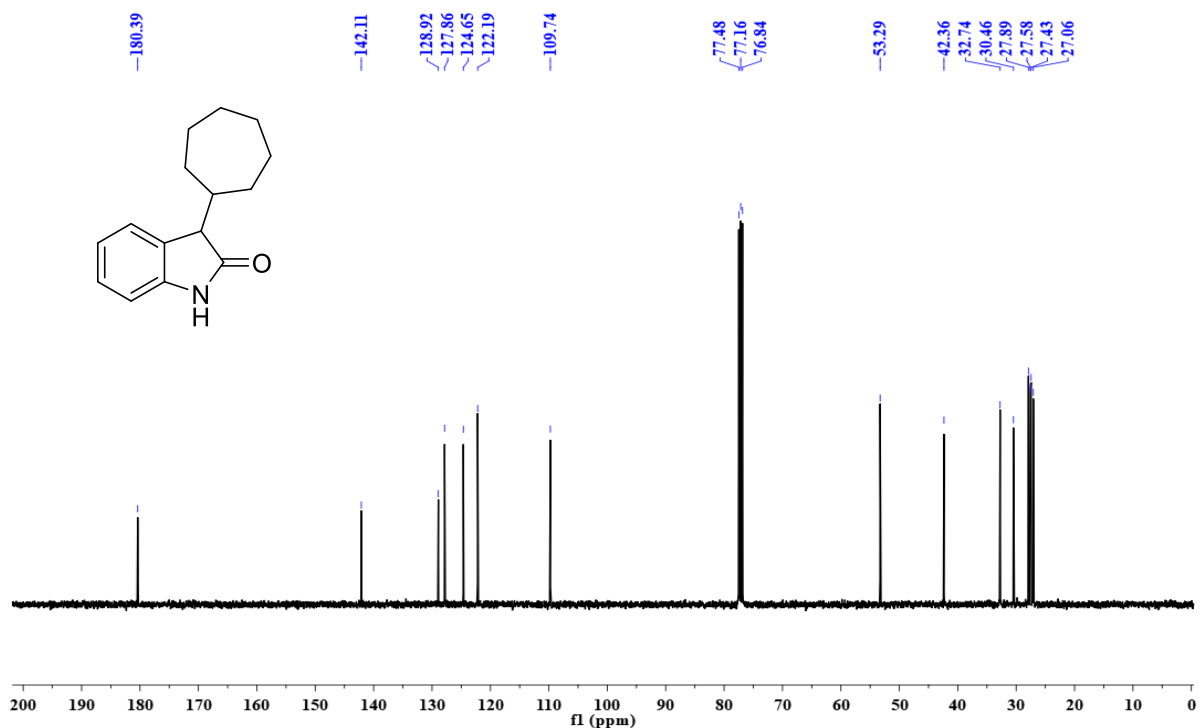

**Figure S06.**  $^{13}\text{C}\{^1\text{H}\}$  NMR (101 MHz,  $\text{CDCl}_3$ ) of 3-cycloheptylindolin-2-one (**P3**).

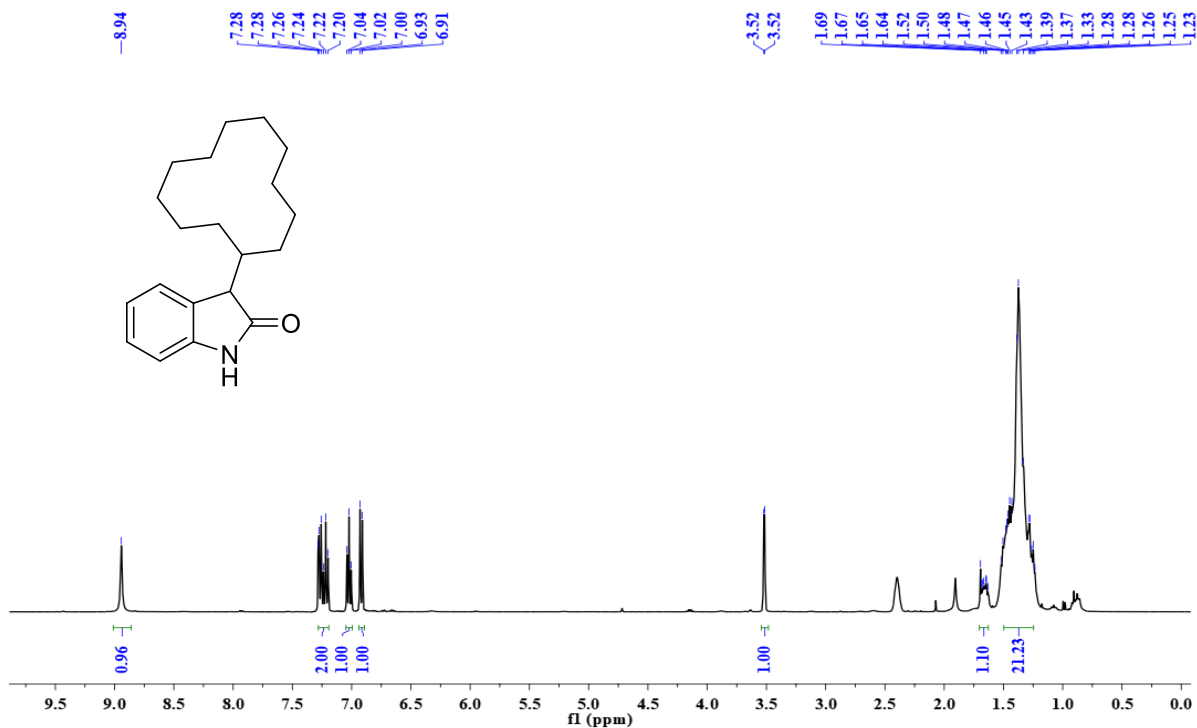

**Figure S07.**  $^1\text{H NMR}$  (400 MHz,  $\text{CDCl}_3$ ) of 3-cyclododecylindolin-2-one (P4).

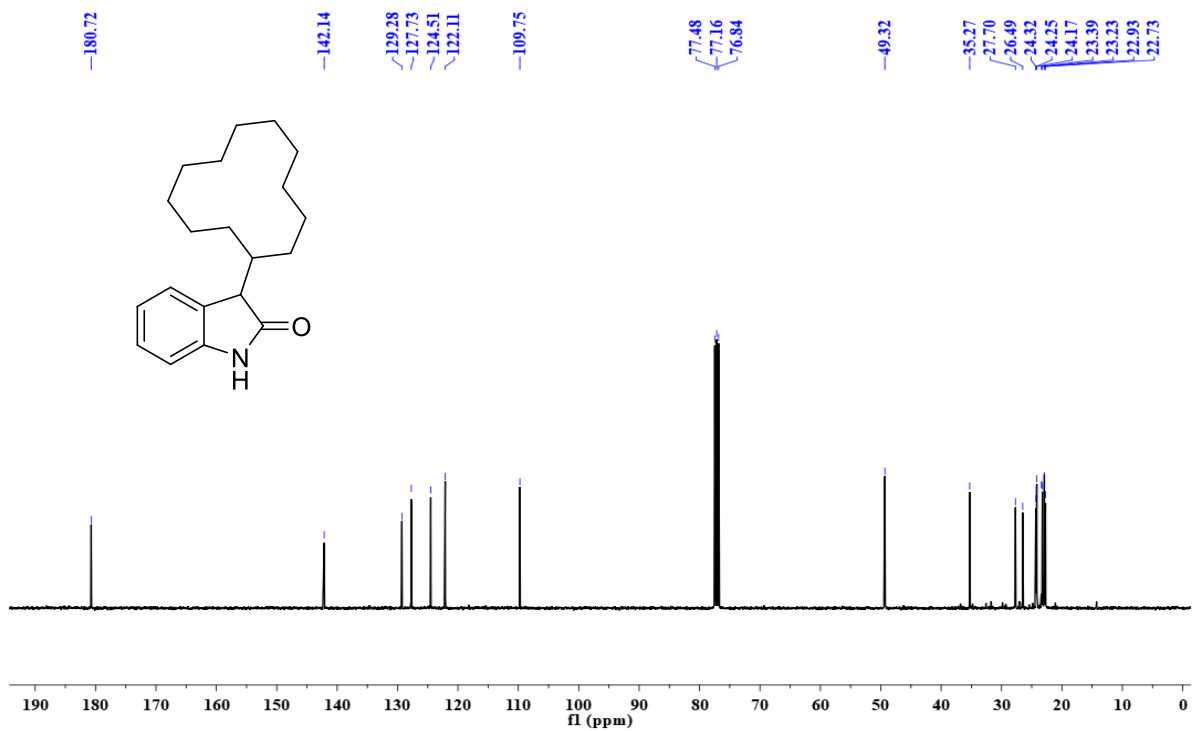

**Figure S08.**  $^{13}\text{C}\{^1\text{H}\}$  NMR (101 MHz,  $\text{CDCl}_3$ ) of 3-cyclododecylindolin-2-one (P4).



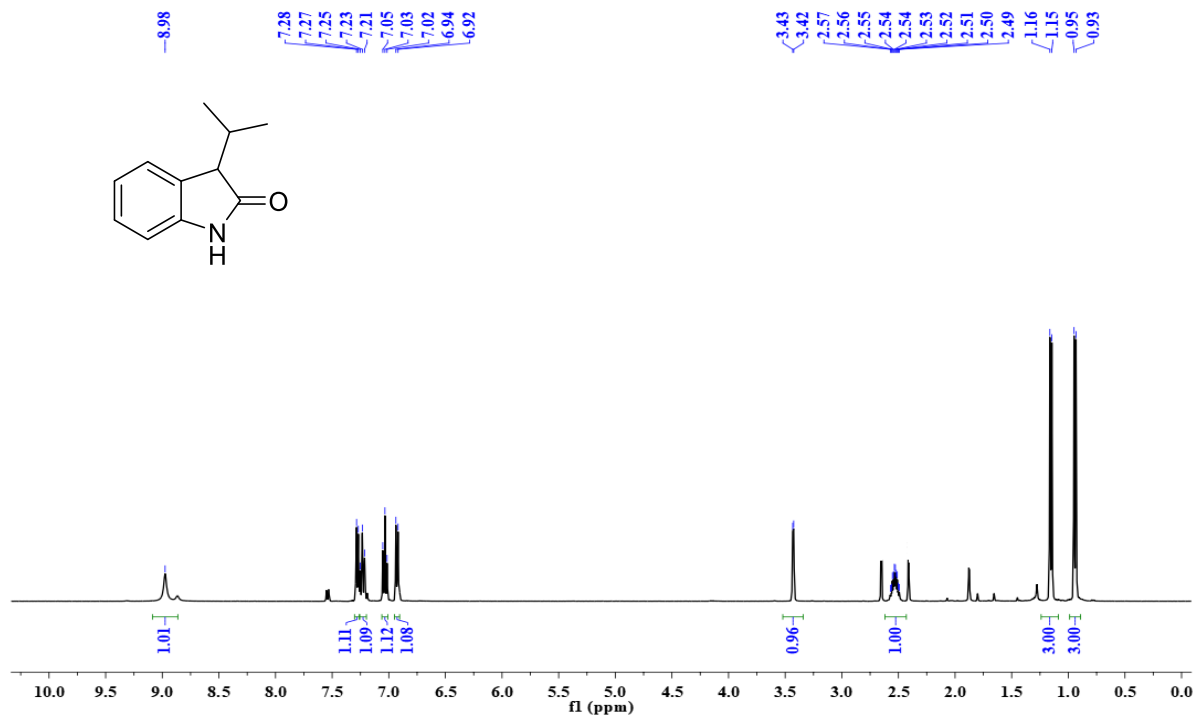

Figure S09. <sup>1</sup>H NMR (400 MHz, CDCl<sub>3</sub>) of 3-isopropylindolin-2-one (P<sub>5</sub>).

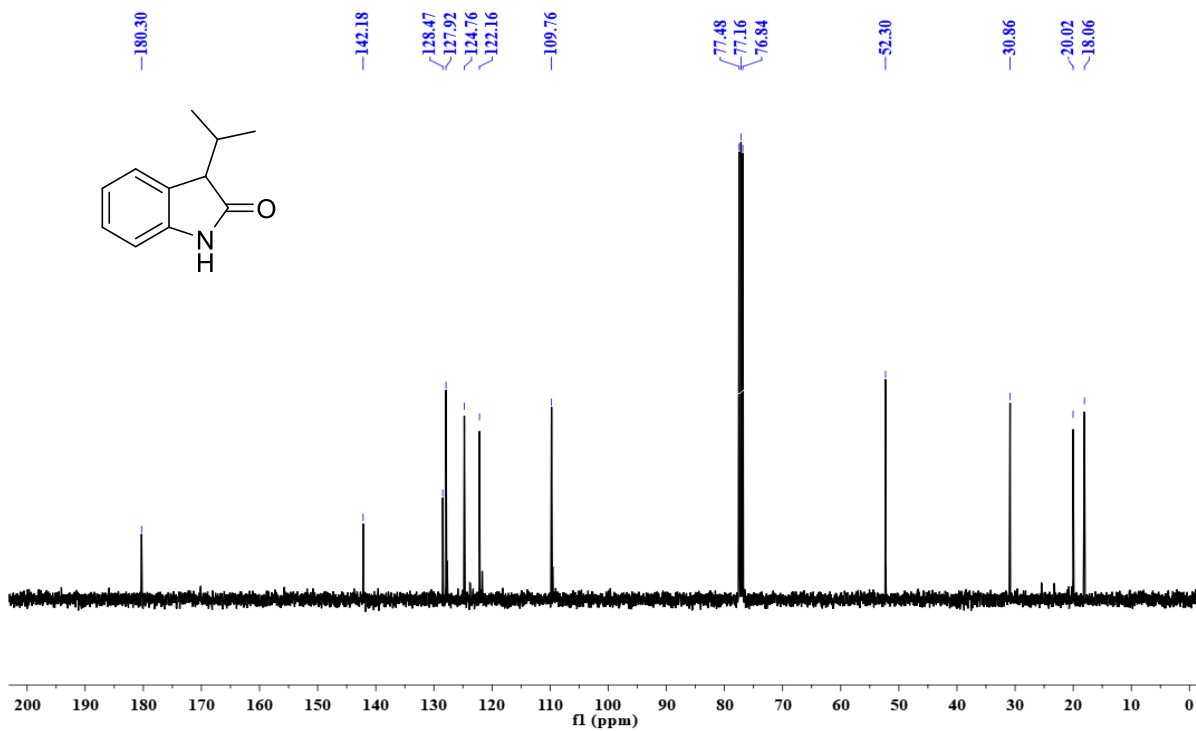

Figure S10. <sup>13</sup>C{<sup>1</sup>H} NMR (101 MHz, CDCl<sub>3</sub>) of 3-isopropylindolin-2-one (P<sub>5</sub>).

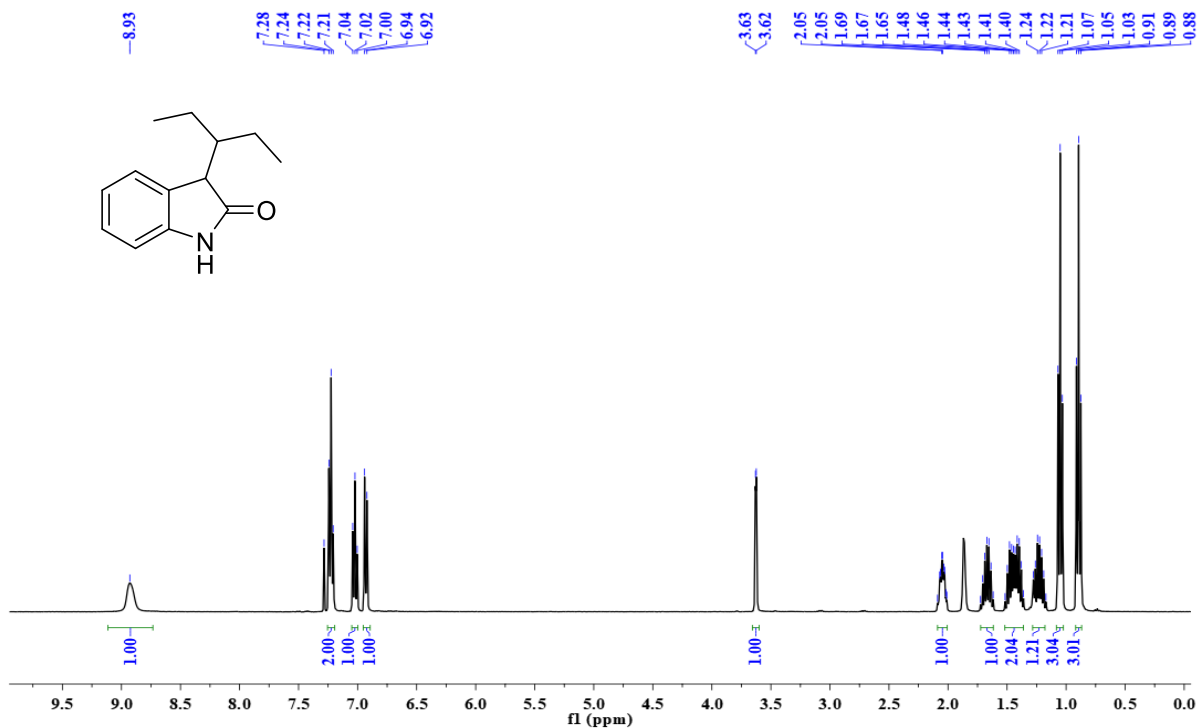

**Figure S11.** <sup>1</sup>H NMR (400 MHz, CDCl<sub>3</sub>) of 3-(pentan-3-yl)indolin-2-one (**P6**).

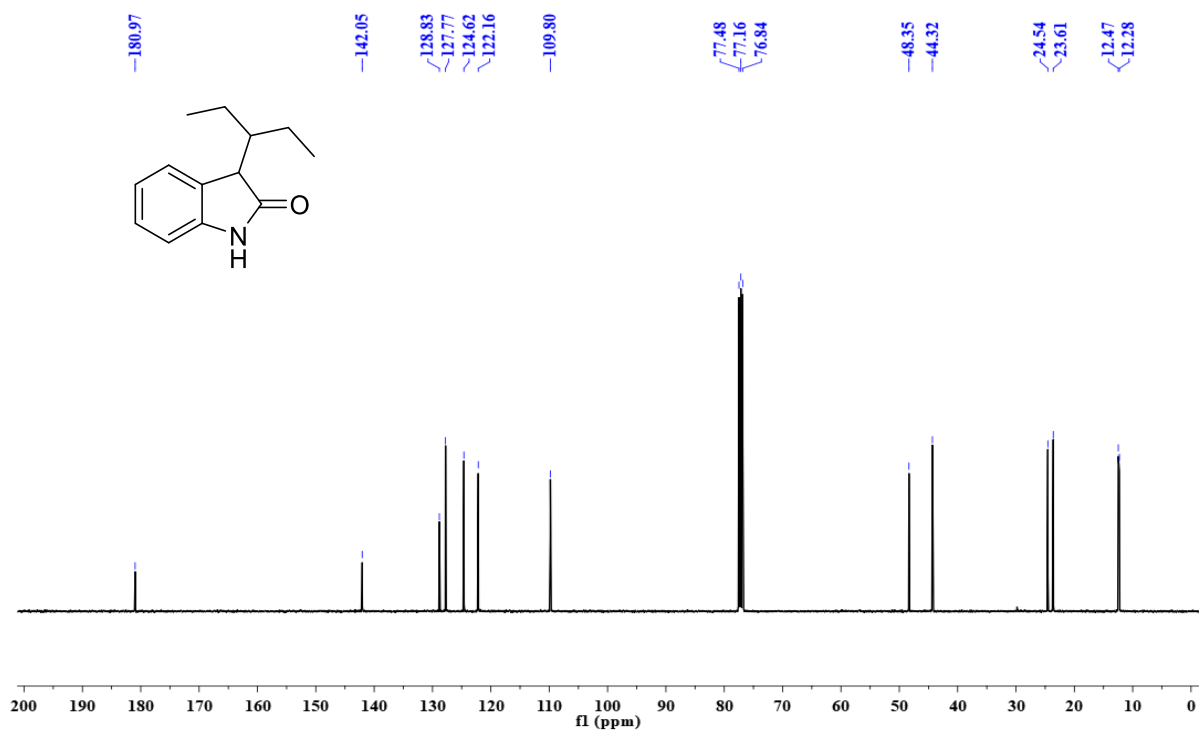

**Figure S12.** <sup>13</sup>C{<sup>1</sup>H} NMR (101 MHz, CDCl<sub>3</sub>) of 3-(pentan-3-yl)indolin-2-one (**P6**).

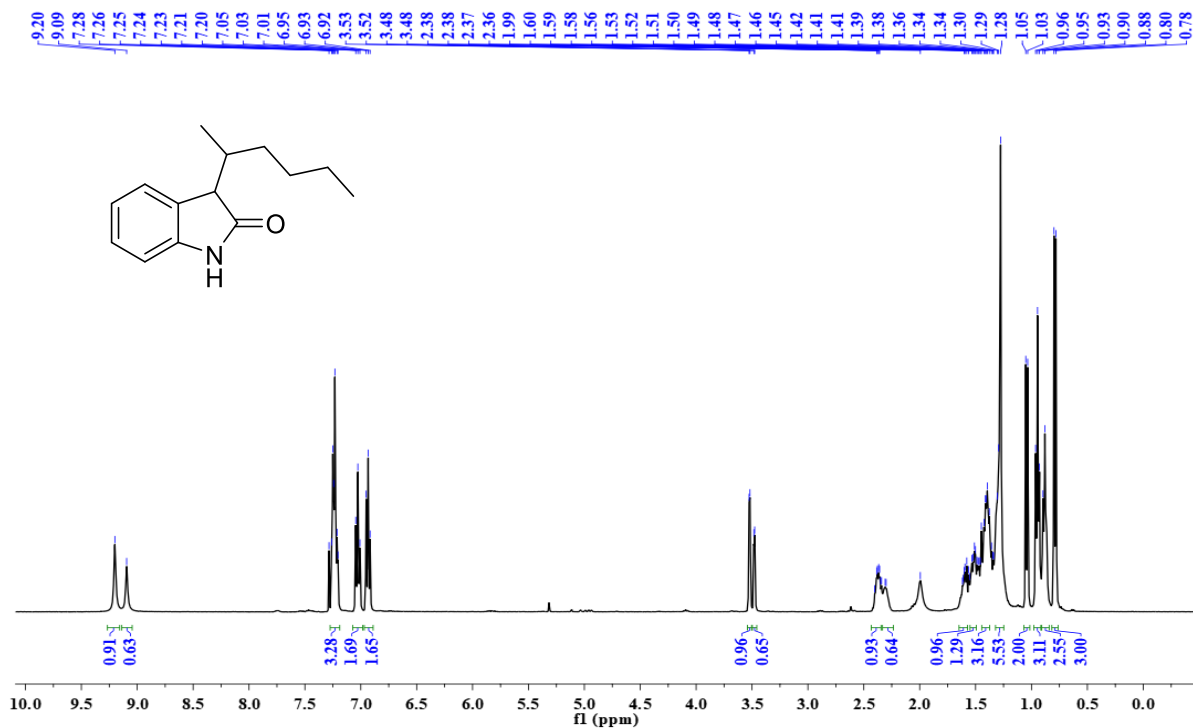

Figure S13. <sup>1</sup>H NMR (400 MHz, CDCl<sub>3</sub>) of 3-(hexan-2-yl)indolin-2-one (P7).

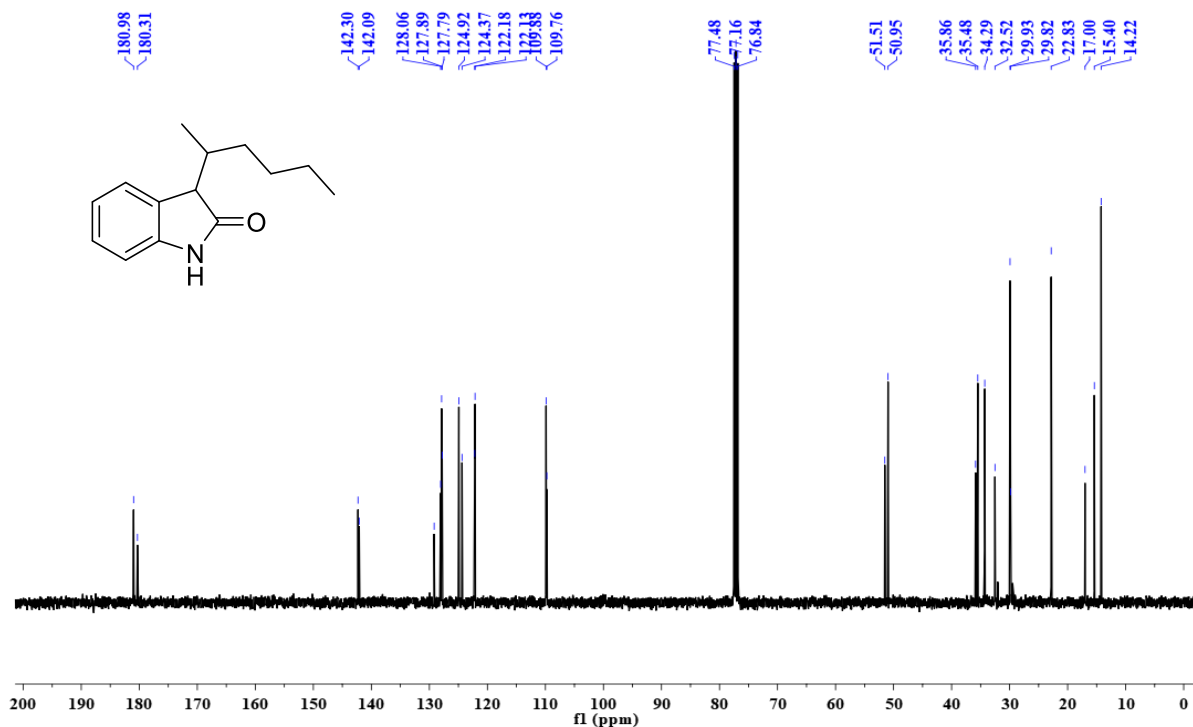

Figure S14. <sup>13</sup>C{<sup>1</sup>H} NMR (101 MHz, CDCl<sub>3</sub>) of 3-(hexan-2-yl)indolin-2-one (P7).

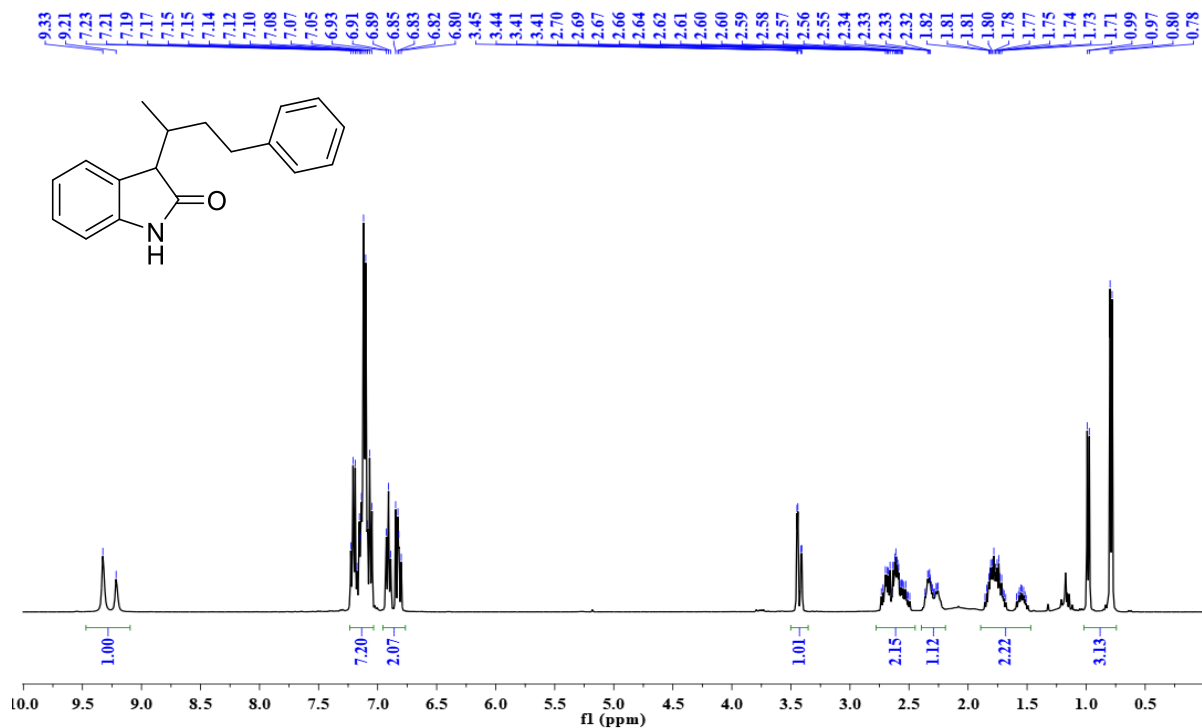

**Figure S15.**  $^1\text{H NMR}$  (400 MHz,  $\text{CDCl}_3$ ) of 3-(4-phenylbutan-2-yl)indolin-2-one (P8).

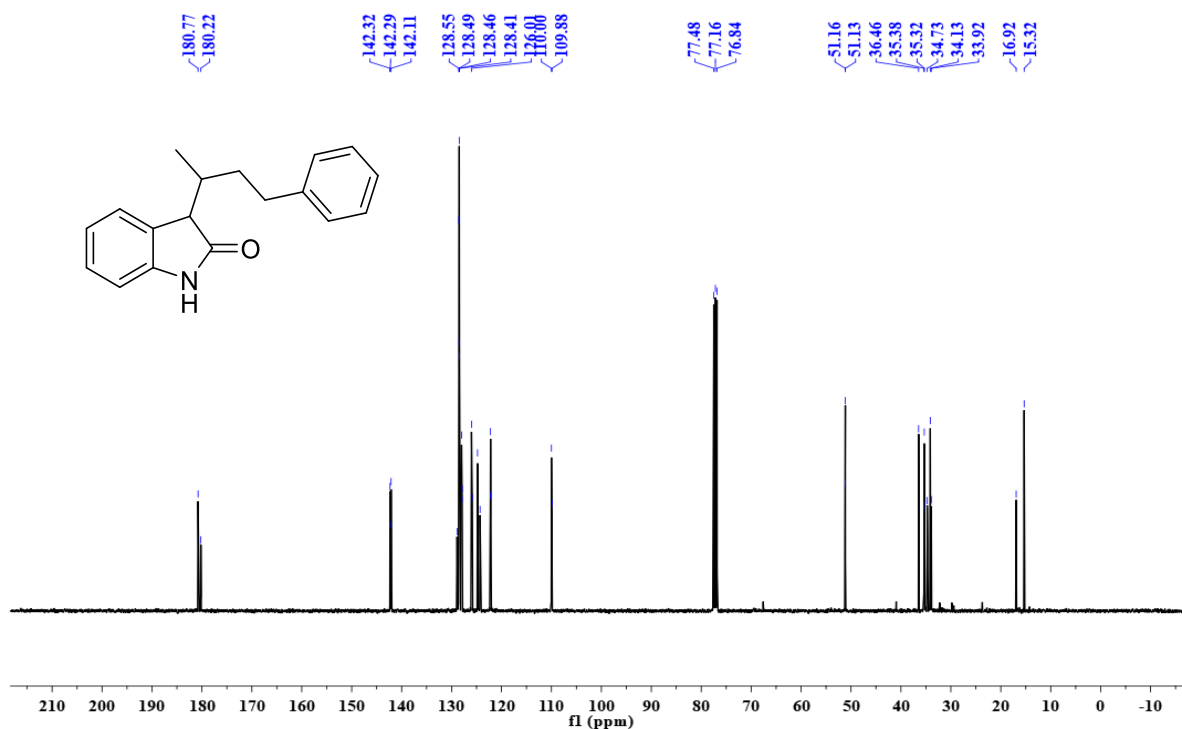

**Figure S16.**  $^{13}\text{C}\{^1\text{H}\}$  NMR (101 MHz,  $\text{CDCl}_3$ ) of 3-(4-phenylbutan-2-yl)indolin-2-one (P8).

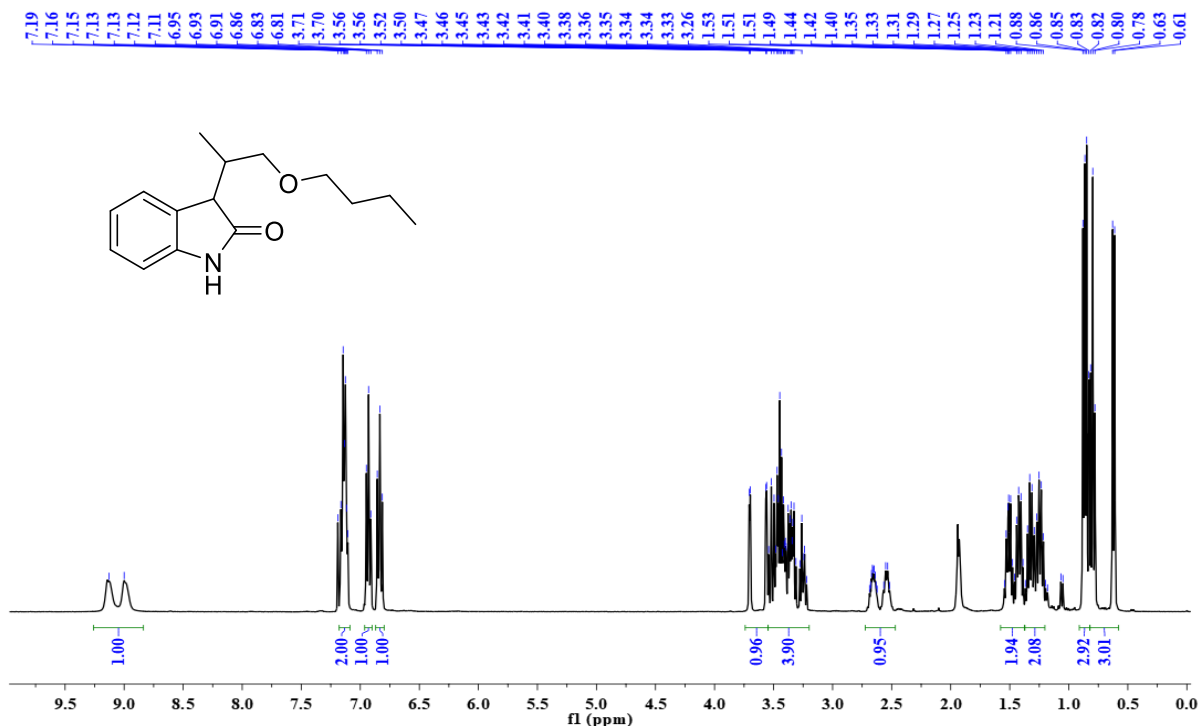

**Figure S17.**  $^1\text{H}$  NMR (400 MHz,  $\text{CDCl}_3$ ) of 3-(1-butoxypropan-2-yl)indolin-2-one (**P9**).

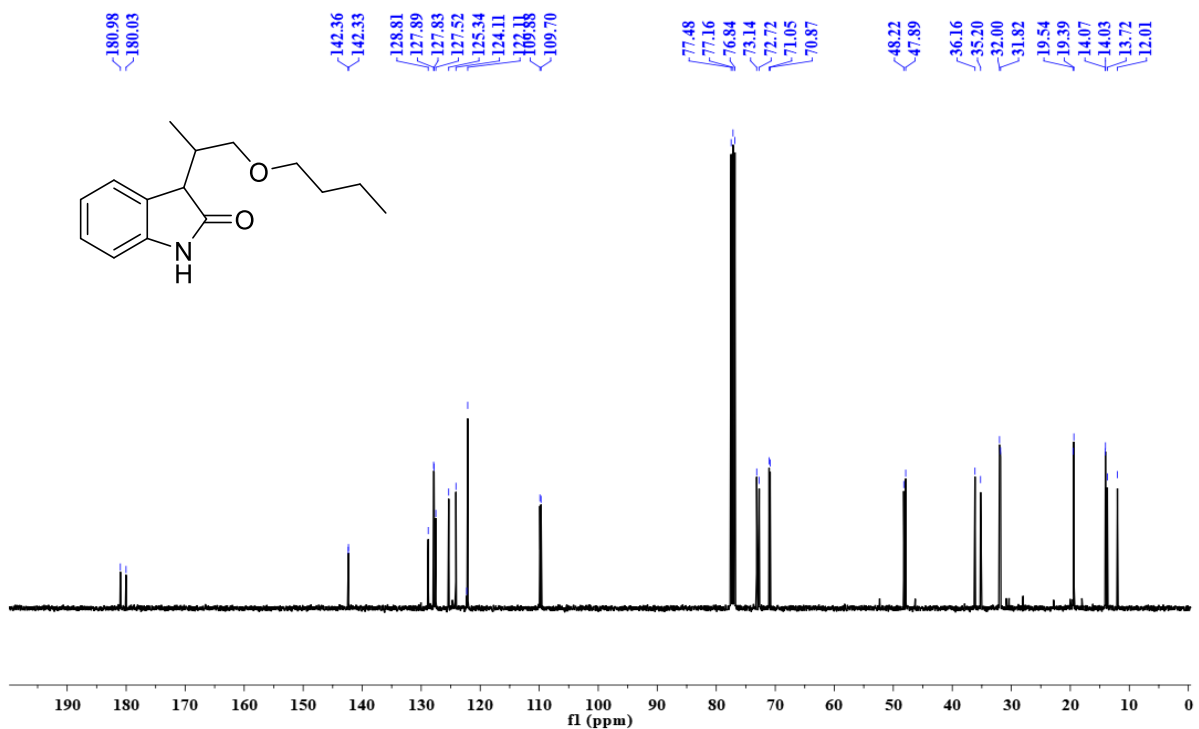

**Figure S18.**  $^{13}\text{C}\{^1\text{H}\}$  NMR (101 MHz,  $\text{CDCl}_3$ ) of 3-(1-butoxypropan-2-yl)indolin-2-one (**P9**).

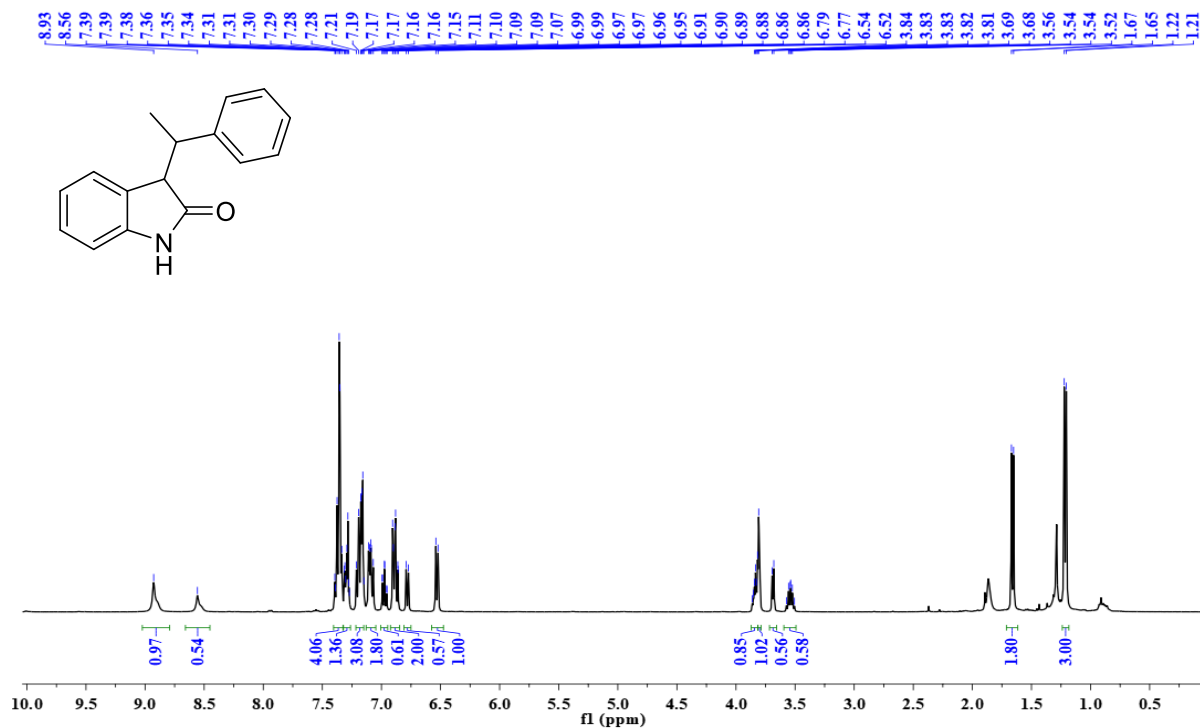

**Figure S19.** <sup>1</sup>H NMR (400 MHz, CDCl<sub>3</sub>) of 3-(1-phenylethyl)indolin-2-one (**P10**).

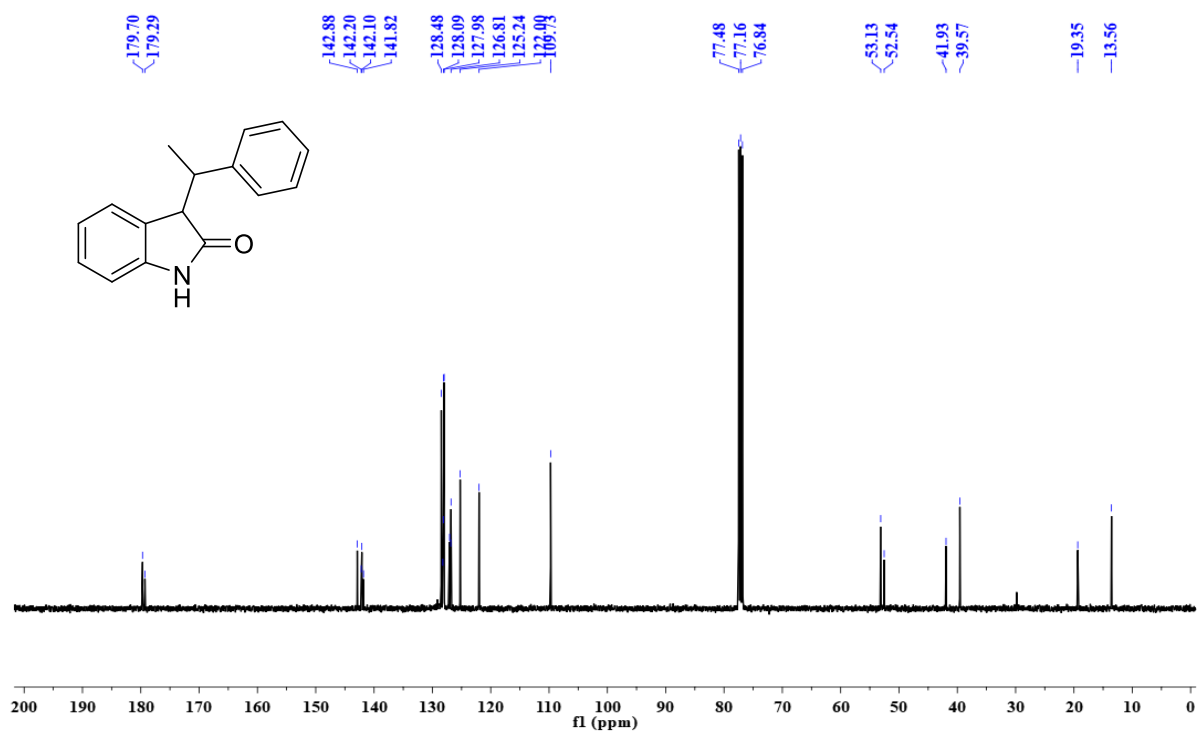

**Figure S20.** <sup>13</sup>C{<sup>1</sup>H} NMR (101 MHz, CDCl<sub>3</sub>) of 3-(1-phenylethyl)indolin-2-one (**P10**).

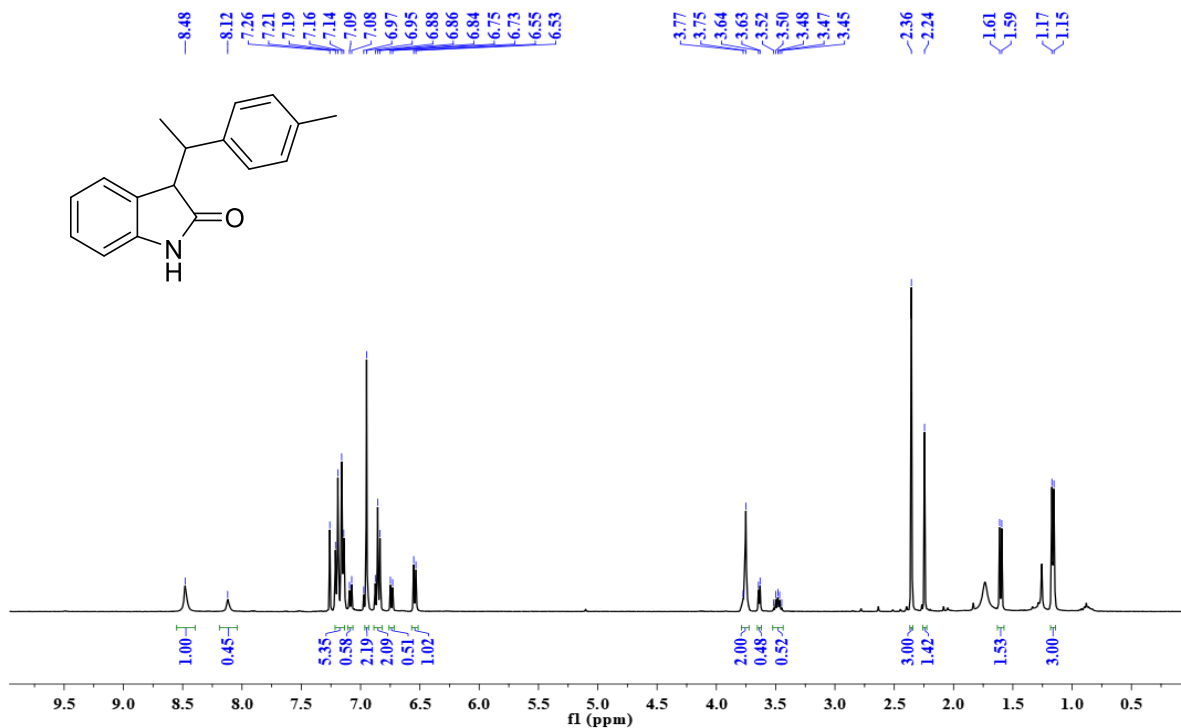

**Figure S21.** <sup>1</sup>H NMR (400 MHz, CDCl<sub>3</sub>) of 3-(1-(p-tolyl)ethyl)indolin-2-one (**P11**).

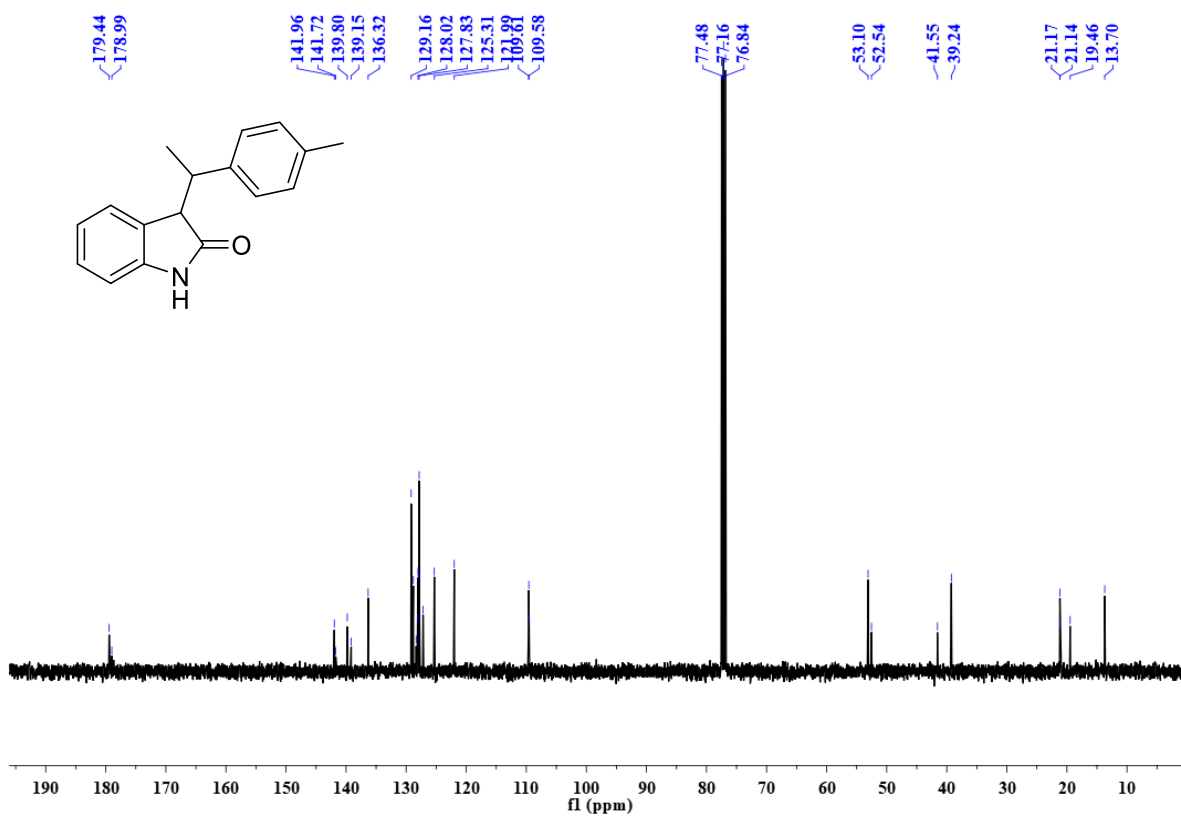

**Figure S22.** <sup>13</sup>C{<sup>1</sup>H} NMR (101 MHz, CDCl<sub>3</sub>) of 3-(1-(p-tolyl)ethyl)indolin-2-one (**P11**).

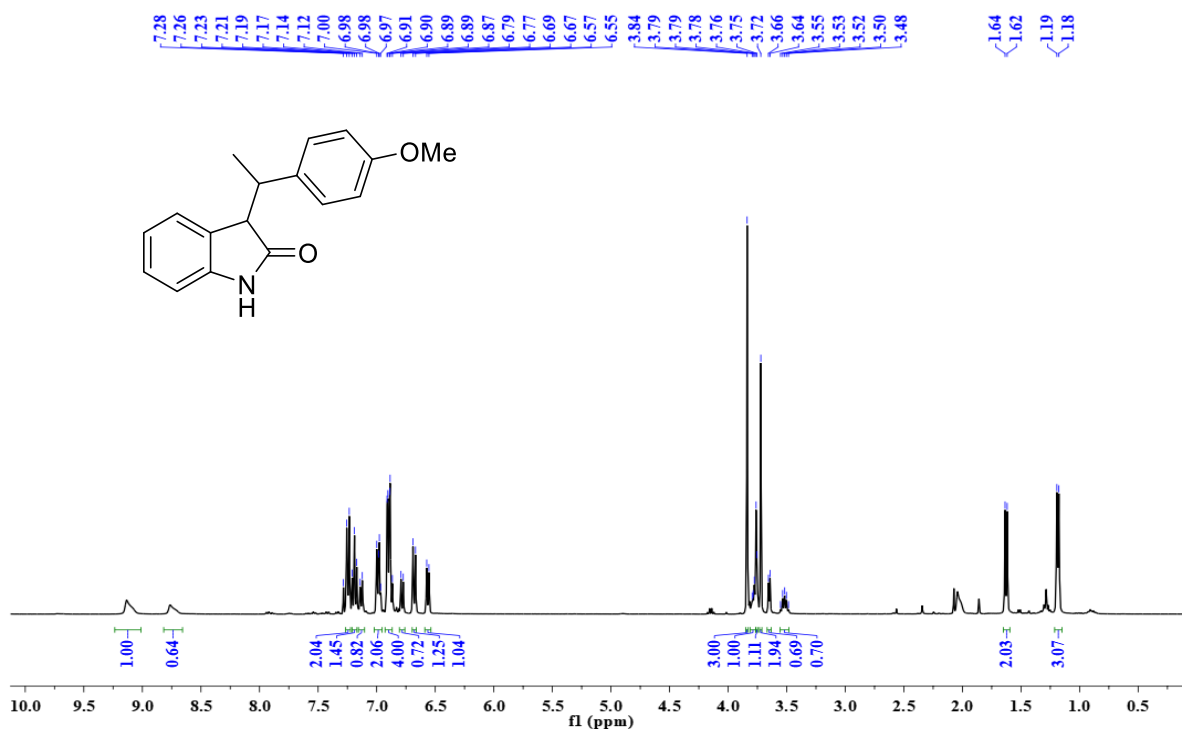

**Figure S23.** <sup>1</sup>H NMR (400 MHz, CDCl<sub>3</sub>) of 3-(1-(4-methoxyphenyl)ethyl)indolin-2-one (P12).

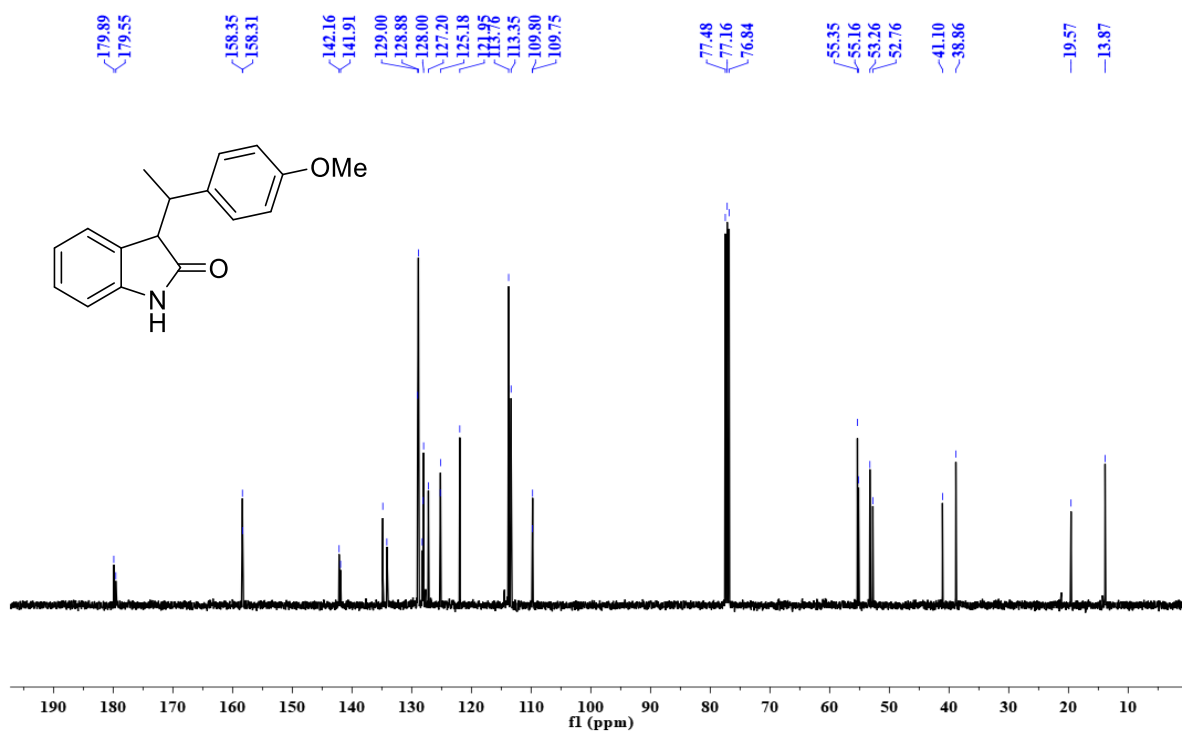

**Figure S24.** <sup>13</sup>C{<sup>1</sup>H} NMR (101 MHz, CDCl<sub>3</sub>) of 3-(1-(4-methoxyphenyl)ethyl)indolin-2-one (P12).



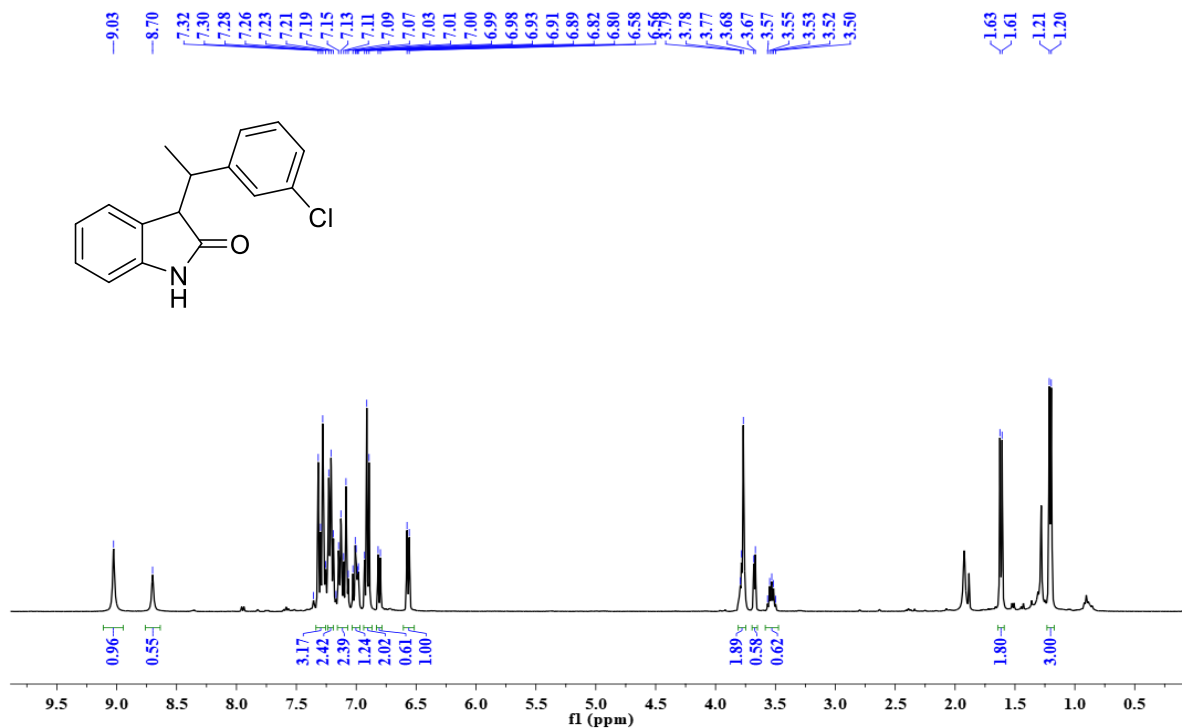

**Figure S25.** <sup>1</sup>H NMR (400 MHz, CDCl<sub>3</sub>) of 3-(1-(3-chlorophenyl)ethyl)indolin-2-one (P13).

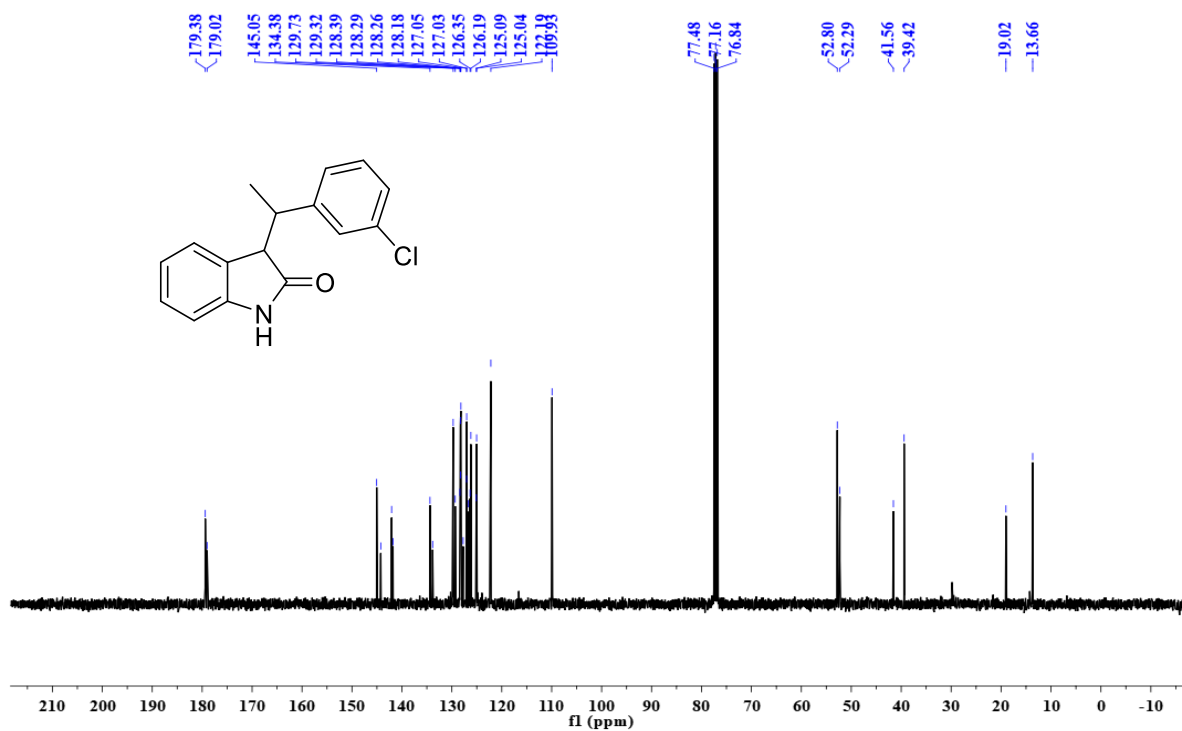

**Figure S26.** <sup>13</sup>C{<sup>1</sup>H} NMR (101 MHz, CDCl<sub>3</sub>) of 3-(1-(3-chlorophenyl)ethyl)indolin-2-one (P13).

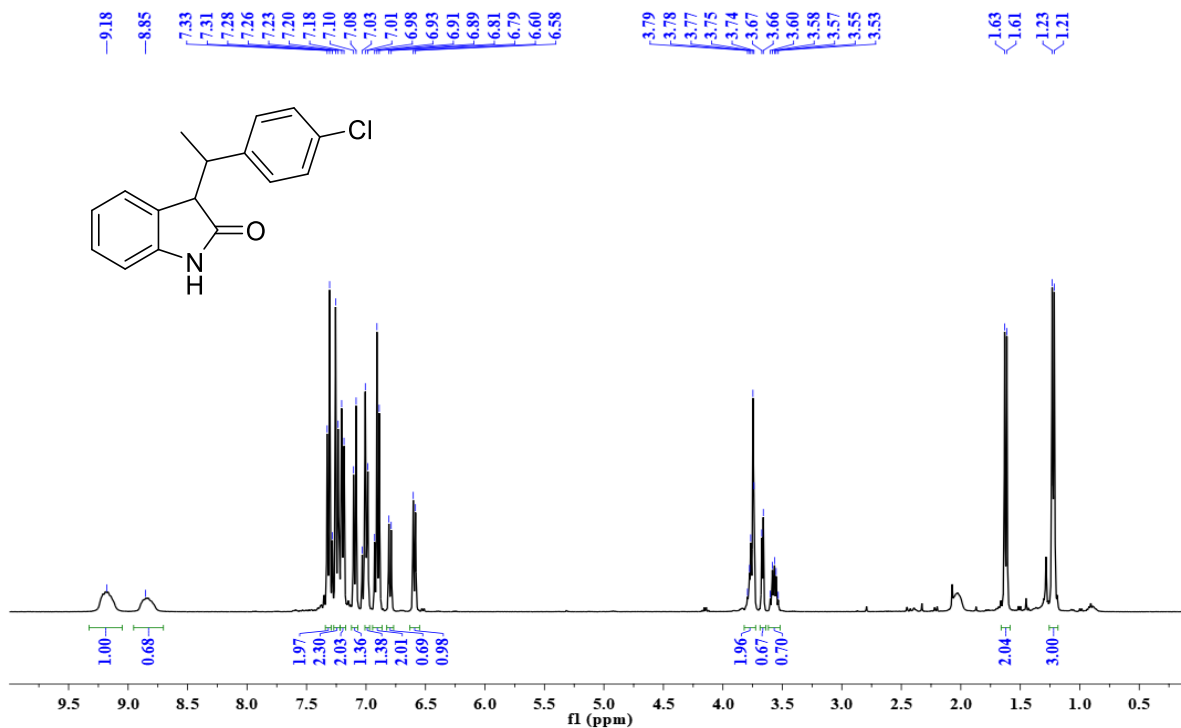

**Figure S27.** <sup>1</sup>H NMR (400 MHz, CDCl<sub>3</sub>) of 3-(1-(4-chlorophenyl)ethyl)indolin-2-one (P<sub>14</sub>).

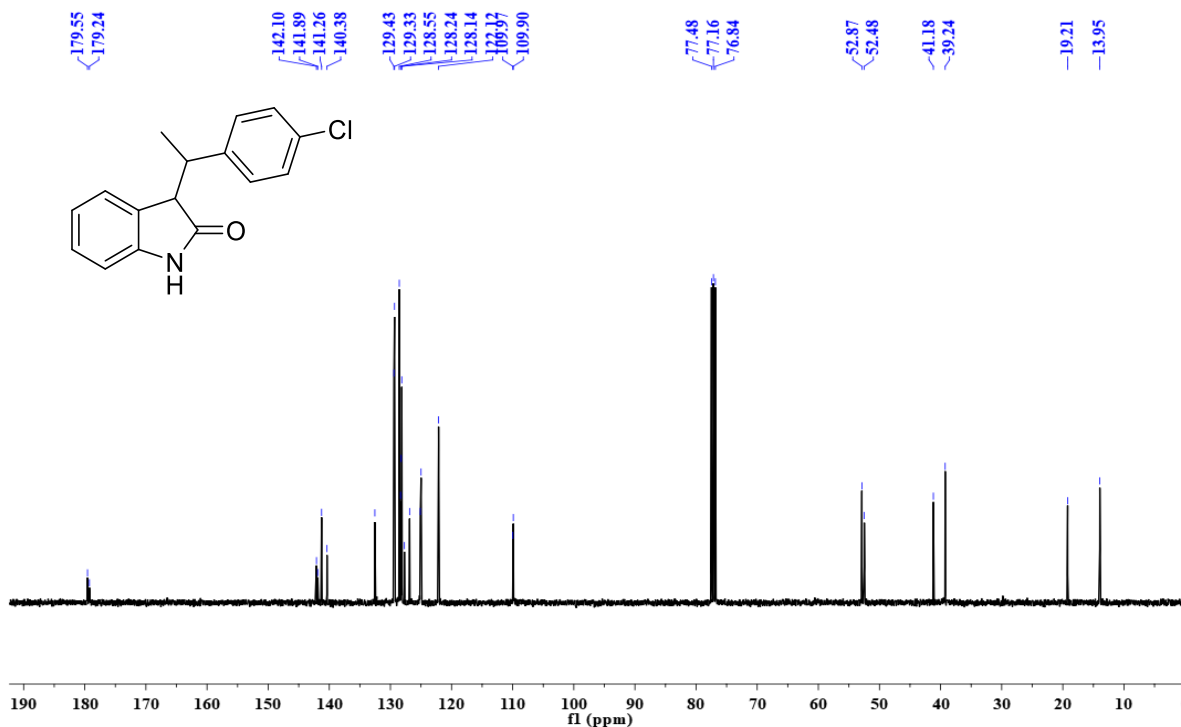

**Figure S28.** <sup>13</sup>C{<sup>1</sup>H} NMR (101 MHz, CDCl<sub>3</sub>) of 3-(1-(4-chlorophenyl)ethyl)indolin-2-one (P<sub>14</sub>).

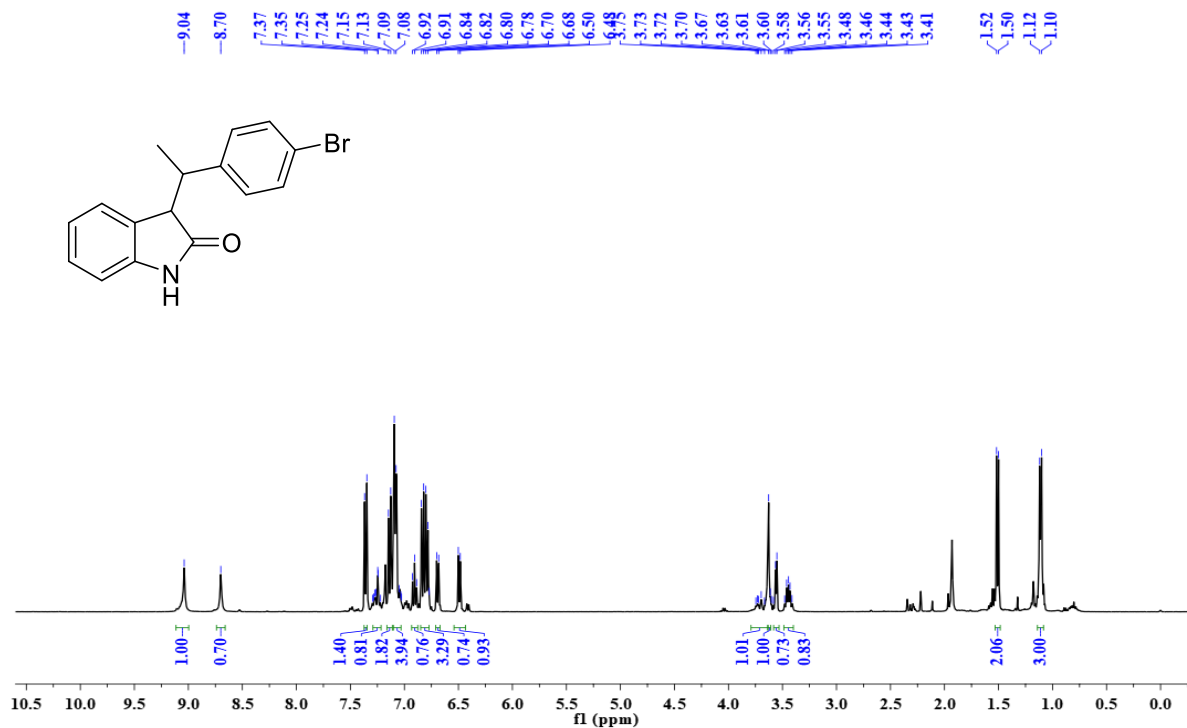

**Figure S29.** <sup>1</sup>H NMR (400 MHz, CDCl<sub>3</sub>) of 3-(1-(4-bromophenyl)ethyl)indolin-2-one (**P15**).

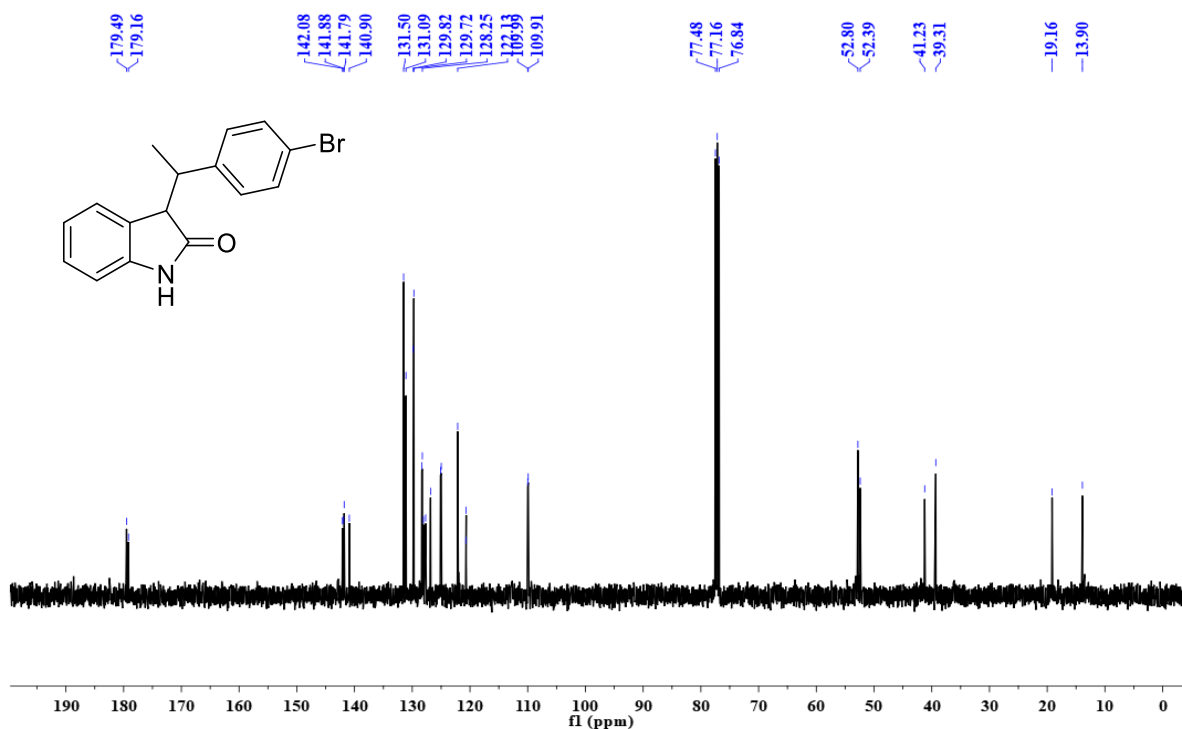

**Figure S30.** <sup>13</sup>C{<sup>1</sup>H} NMR (101 MHz, CDCl<sub>3</sub>) of 3-(1-(4-bromophenyl)ethyl)indolin-2-one (**P15**).



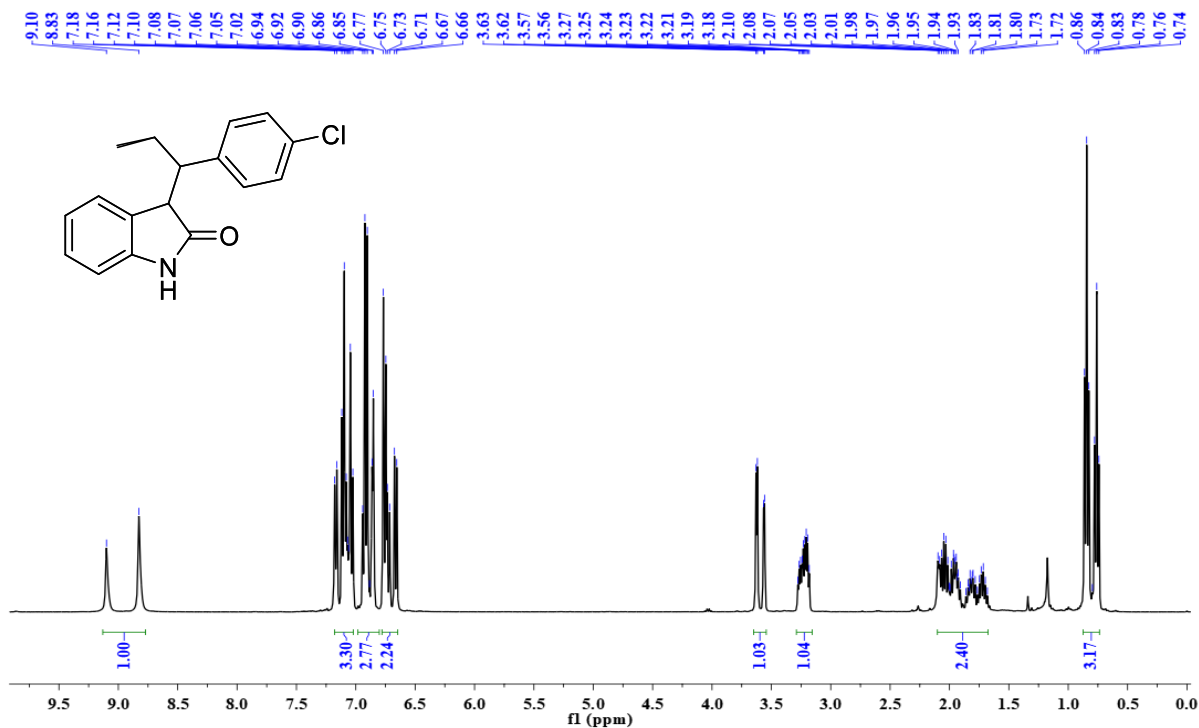

**Figure S33.** <sup>1</sup>H NMR (400 MHz, CDCl<sub>3</sub>) of 3-(1-(4-chlorophenyl)propyl)indolin-2-one (P17).

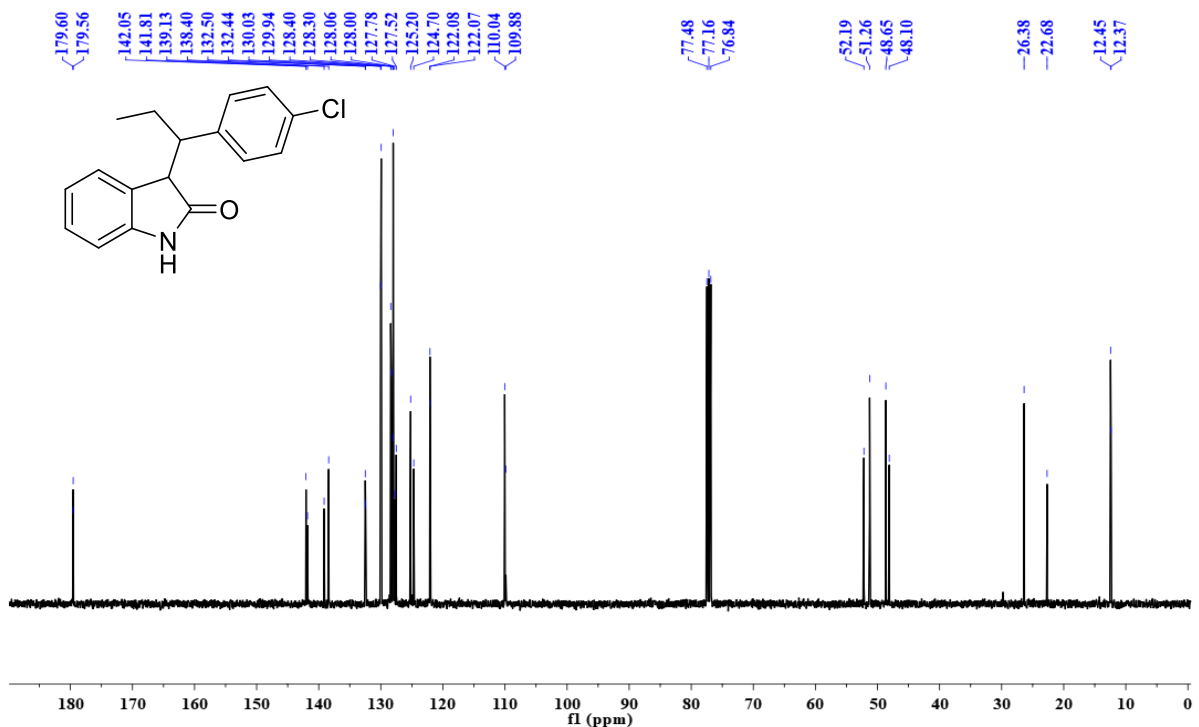

**Figure S34.** <sup>13</sup>C{<sup>1</sup>H} NMR (101 MHz, CDCl<sub>3</sub>) of 3-(1-(4-chlorophenyl)propyl)indolin-2-one (P17).

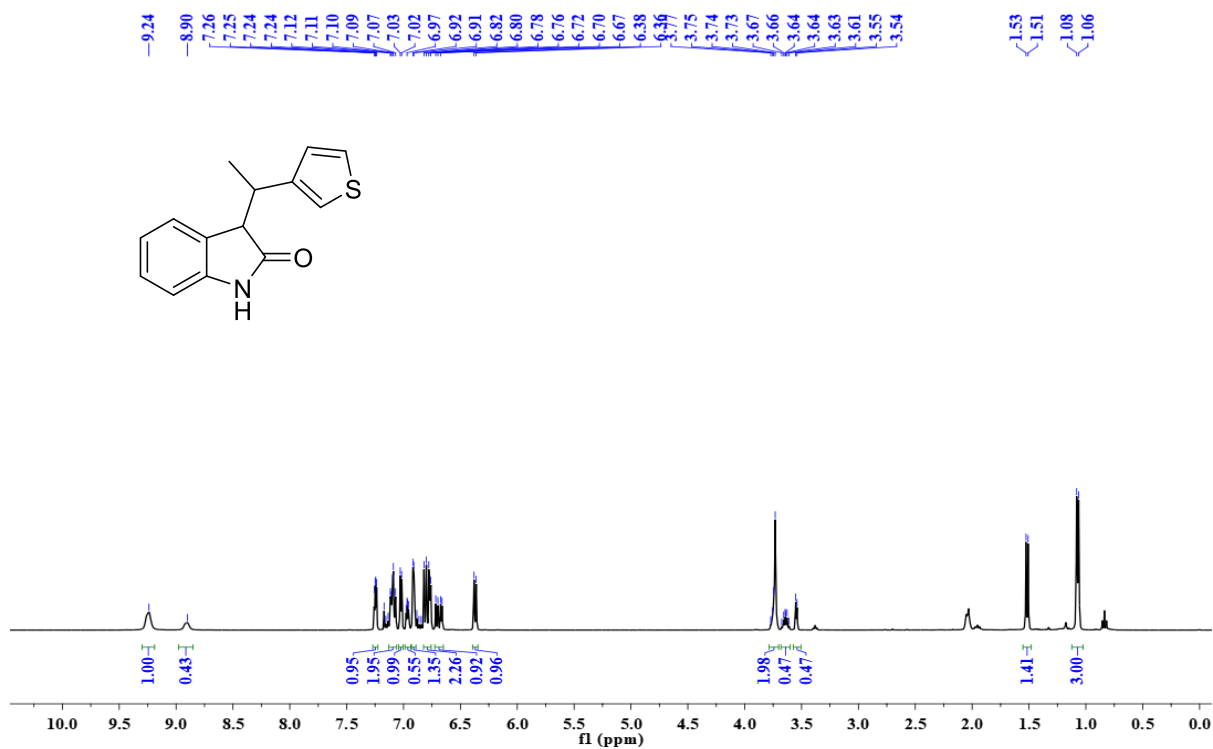

**Figure S35.** <sup>1</sup>H NMR (400 MHz, CDCl<sub>3</sub>) of 3-(1-(thiophen-3-yl)ethyl)indolin-2-one (P18).

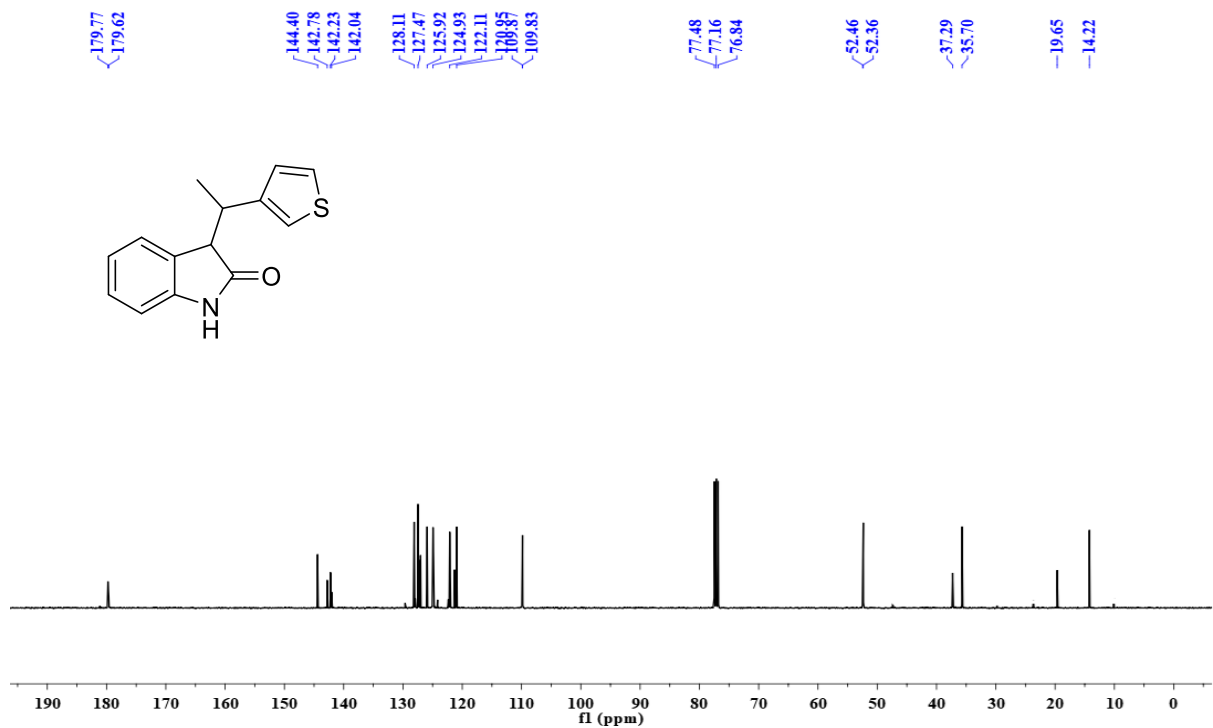

**Figure S36.** <sup>13</sup>C{<sup>1</sup>H} NMR (101 MHz, CDCl<sub>3</sub>) of 3-(1-(thiophen-3-yl)ethyl)indolin-2-one (P18).

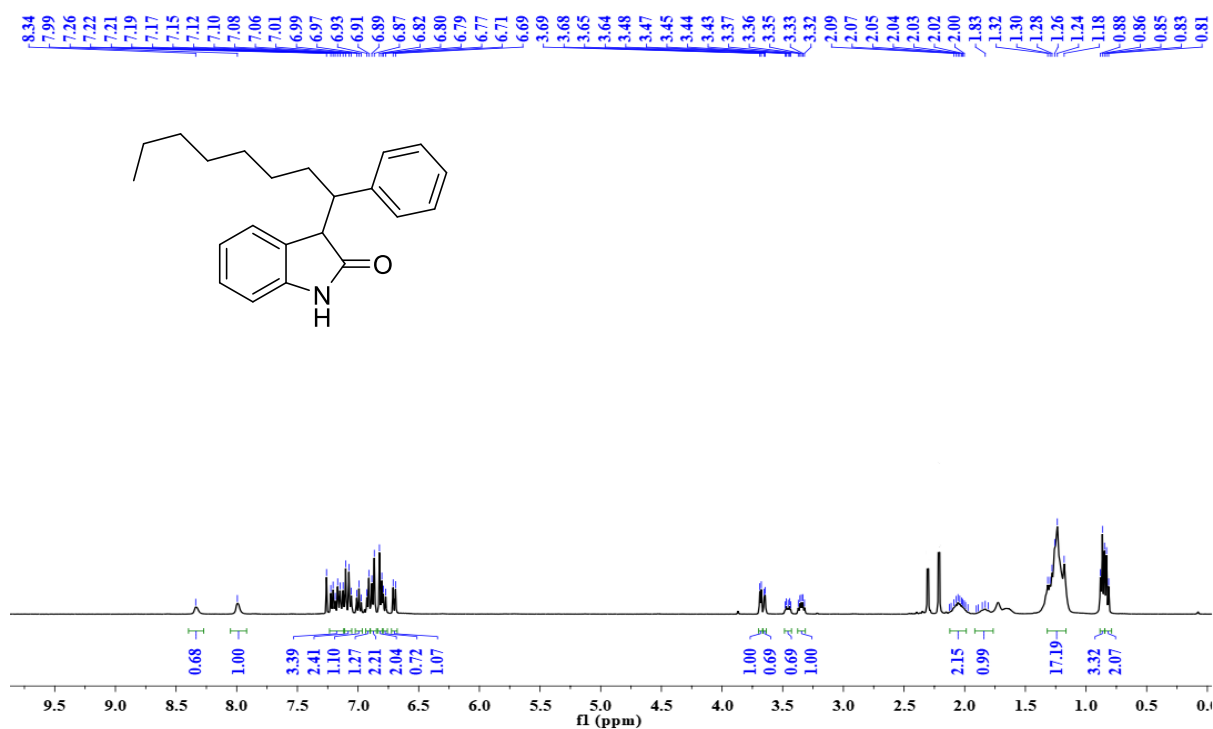

Figure S37. <sup>1</sup>H NMR (400 MHz, CDCl<sub>3</sub>) of 3-(1-phenyloctyl)indolin-2-one (P19).

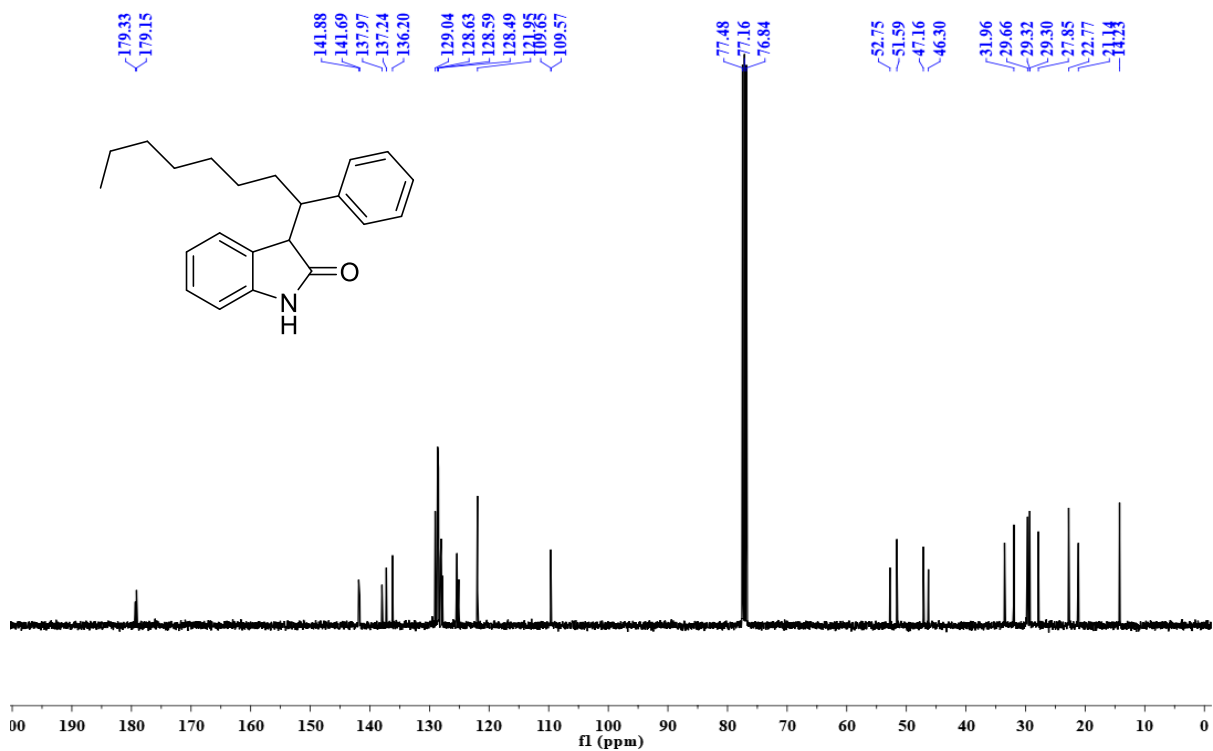

Figure S38. <sup>13</sup>C{<sup>1</sup>H} NMR (101 MHz, CDCl<sub>3</sub>) of 3-(1-phenyloctyl)indolin-2-one (P19).

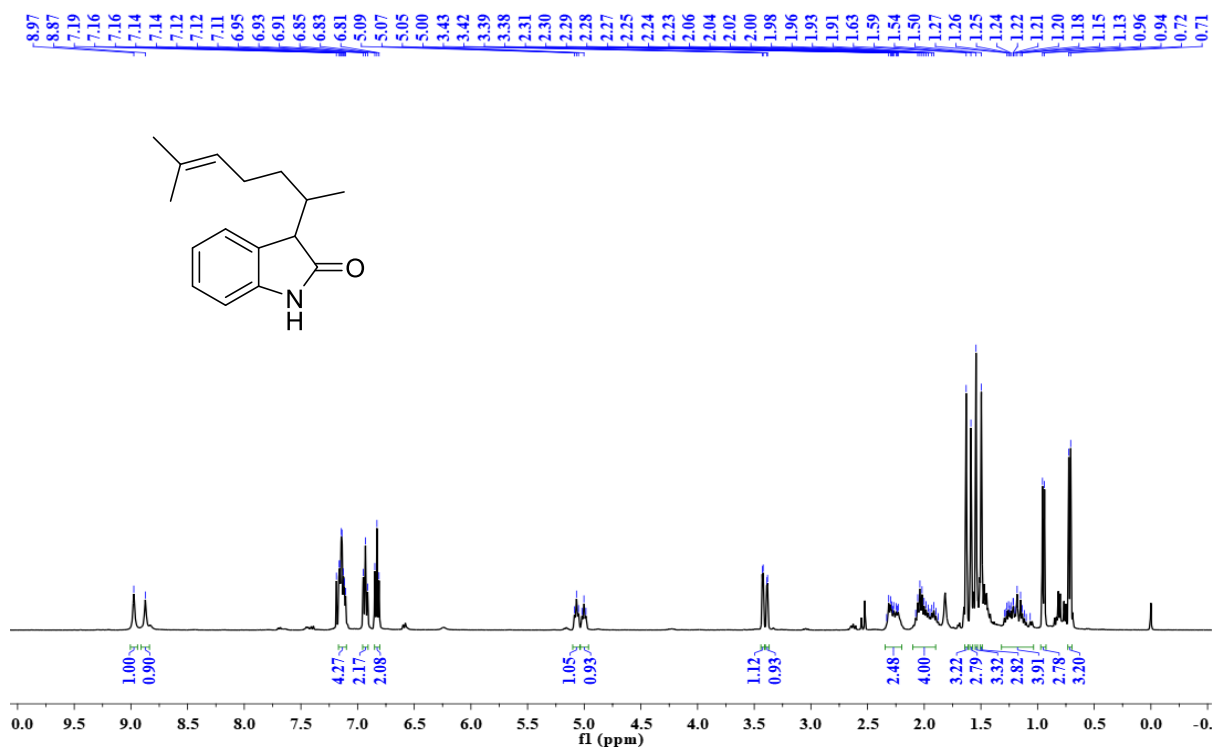

**Figure S39.** <sup>1</sup>H NMR (400 MHz, CDCl<sub>3</sub>) of 3-(6-methylhept-5-en-2-yl)indolin-2-one (P20).

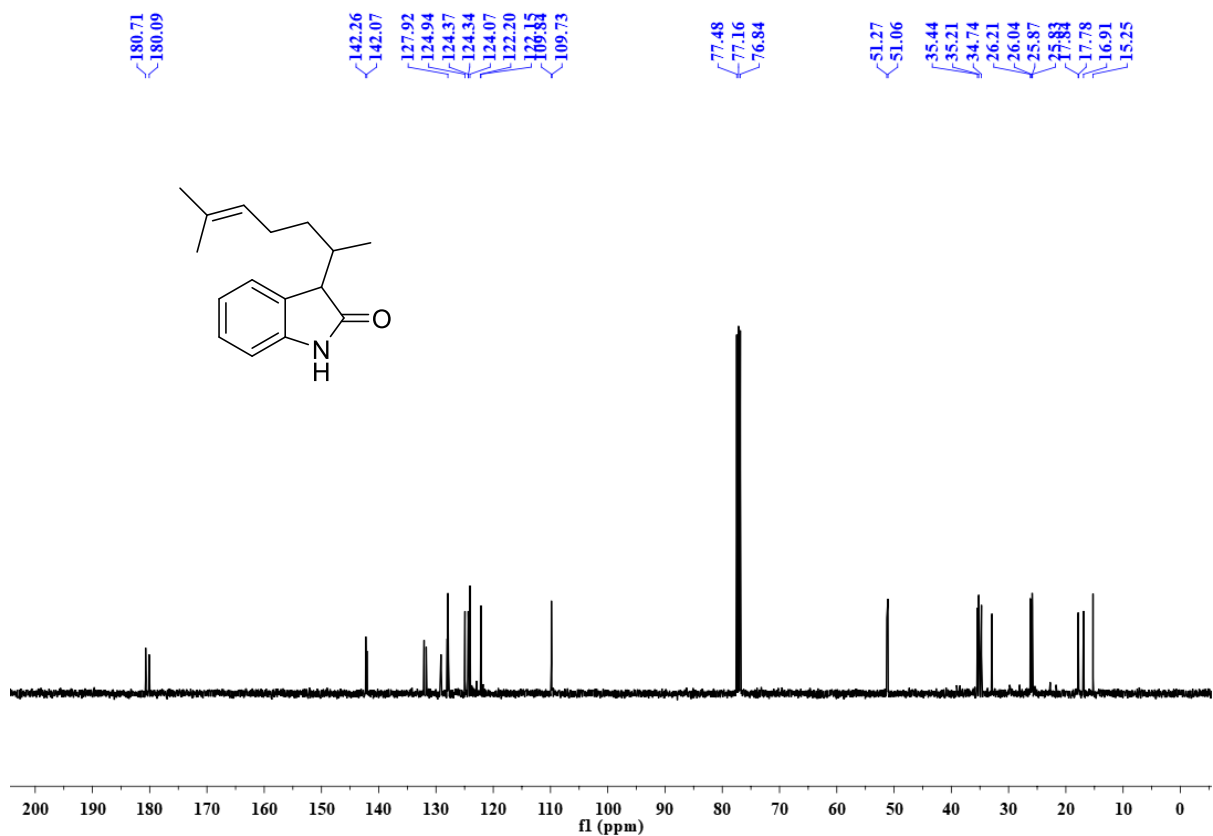

**Figure S40.** <sup>13</sup>C{<sup>1</sup>H} NMR (101 MHz, CDCl<sub>3</sub>) of 3-(6-methylhept-5-en-2-yl)indolin-2-one (P20).



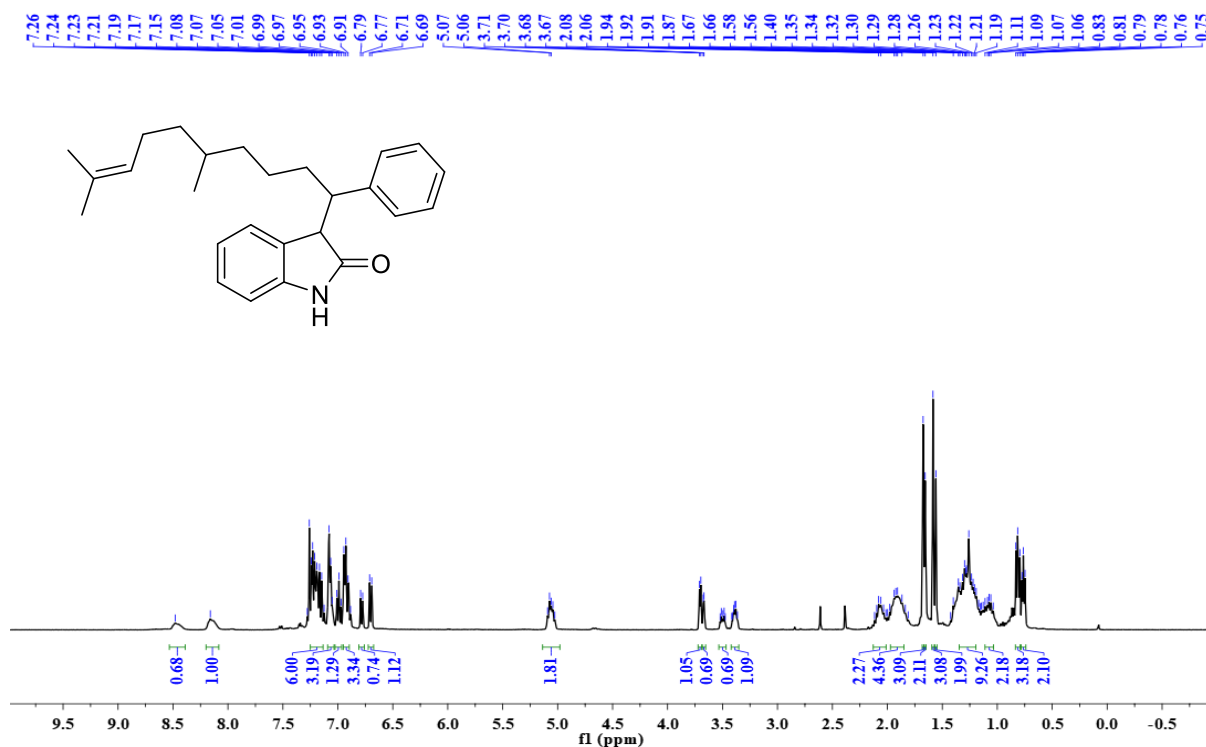

**Figure S41.** <sup>1</sup>H NMR (400 MHz, CDCl<sub>3</sub>) of 3-(5,9-dimethyl-1-phenyldec-8-en-1-yl)indolin-2-one (P<sub>21</sub>).

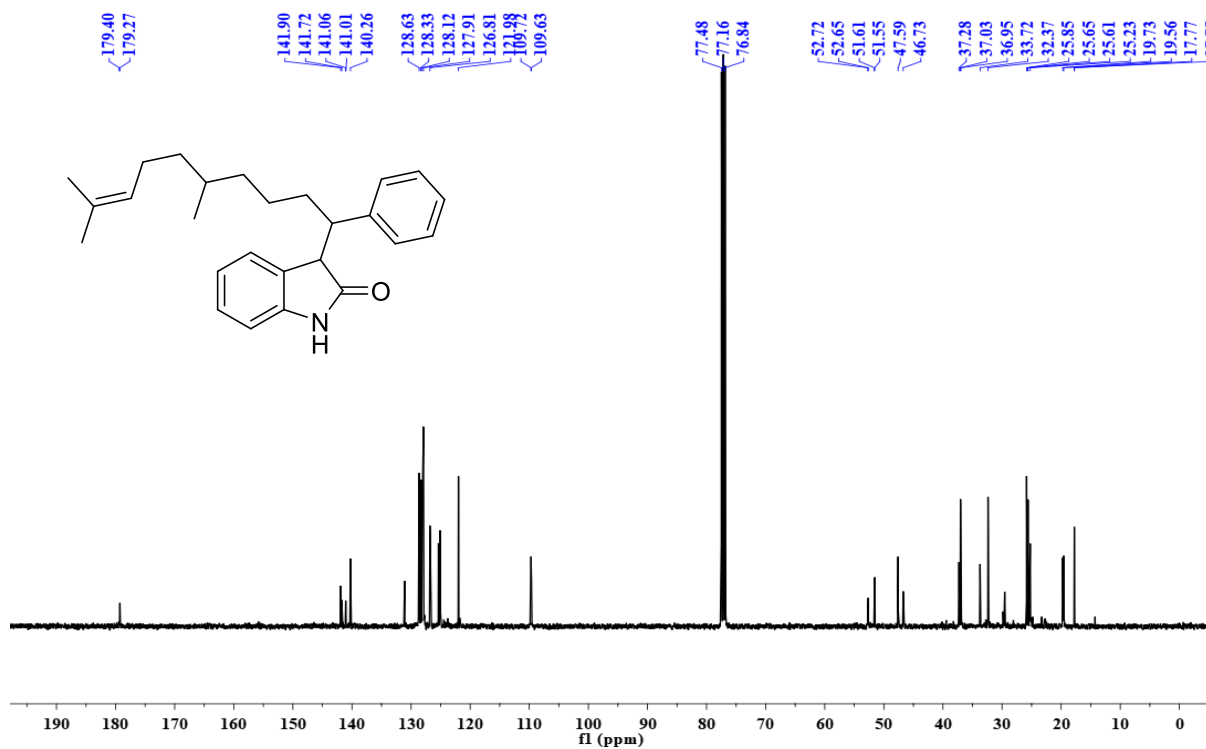

**Figure S42.** <sup>13</sup>C{<sup>1</sup>H} NMR (101 MHz, CDCl<sub>3</sub>) of 3-(5,9-dimethyl-1-phenyldec-8-en-1-yl)indolin-2-one (P<sub>21</sub>).

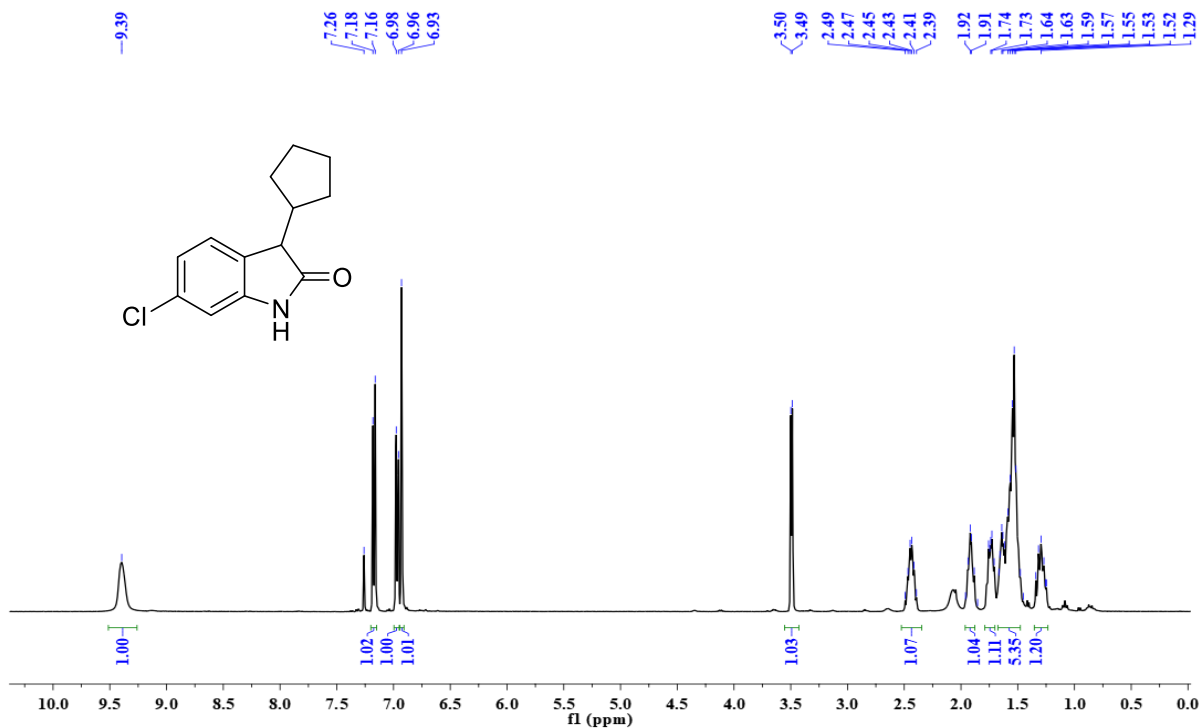

Figure S43. <sup>1</sup>H NMR (400 MHz, CDCl<sub>3</sub>) of 6-chloro-3-cyclopentylindolin-2-one (P22).

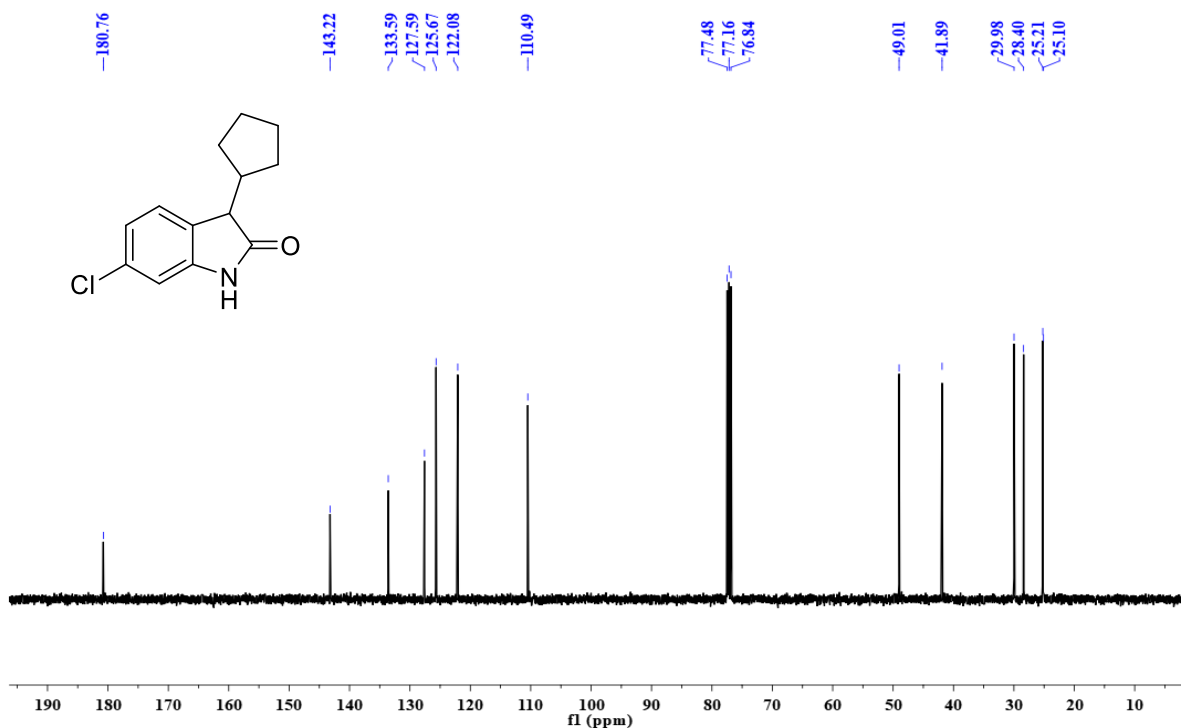

Figure S44. <sup>13</sup>C{<sup>1</sup>H} NMR (101 MHz, CDCl<sub>3</sub>) of 6-chloro-3-cyclopentylindolin-2-one (P22).

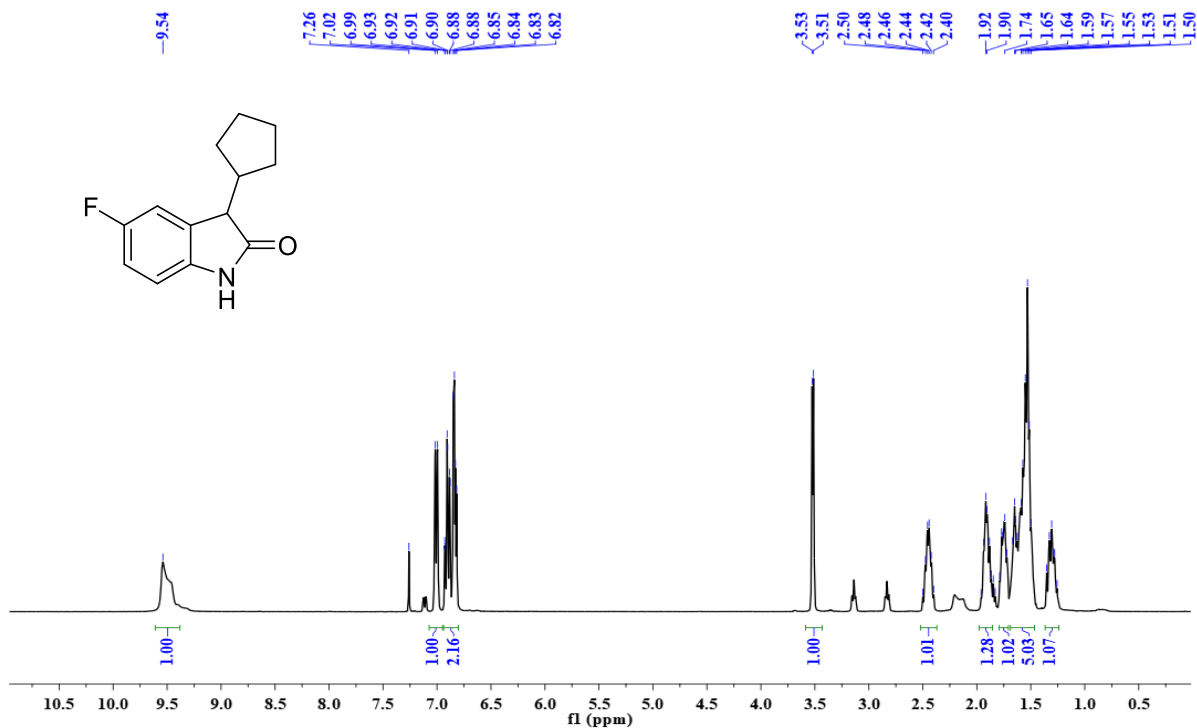

Figure S45. <sup>1</sup>H NMR (400 MHz, CDCl<sub>3</sub>) of 3-cyclopentyl-5-fluorindolin-2-one (P<sub>23</sub>).

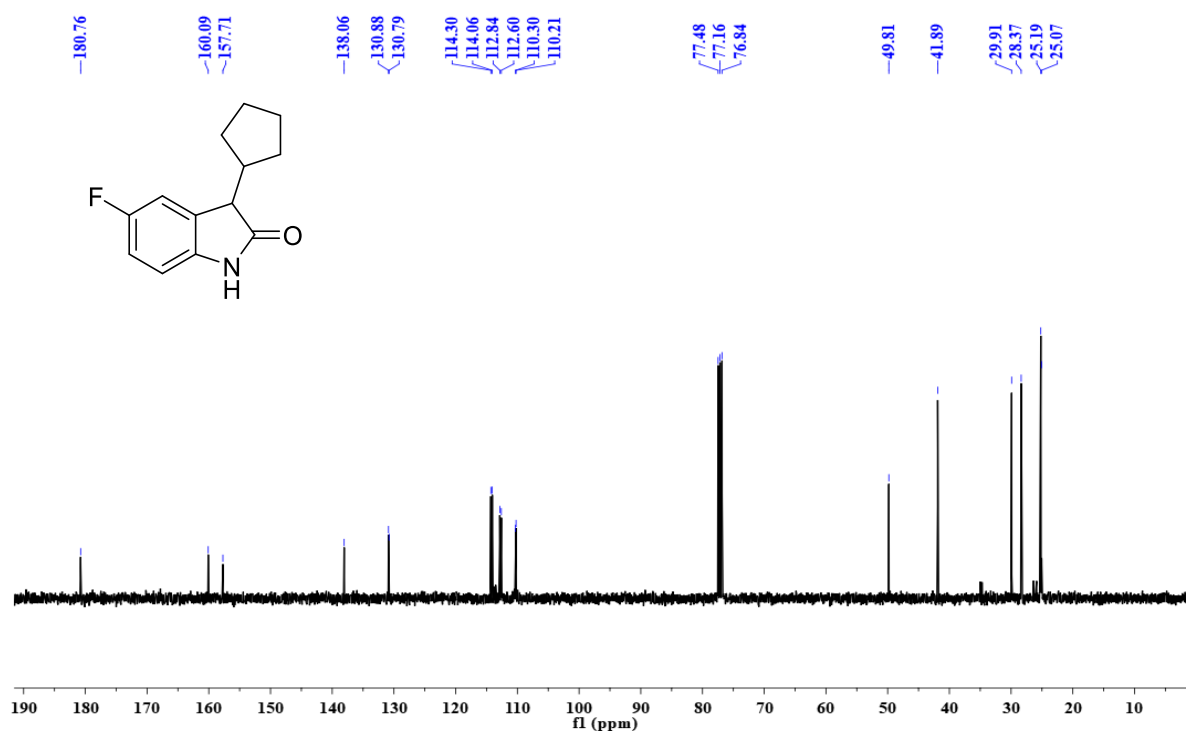

Figure S46. <sup>13</sup>C{<sup>1</sup>H} NMR (101 MHz, CDCl<sub>3</sub>) of 3-cyclopentyl-5-fluorindolin-2-one (P<sub>23</sub>).

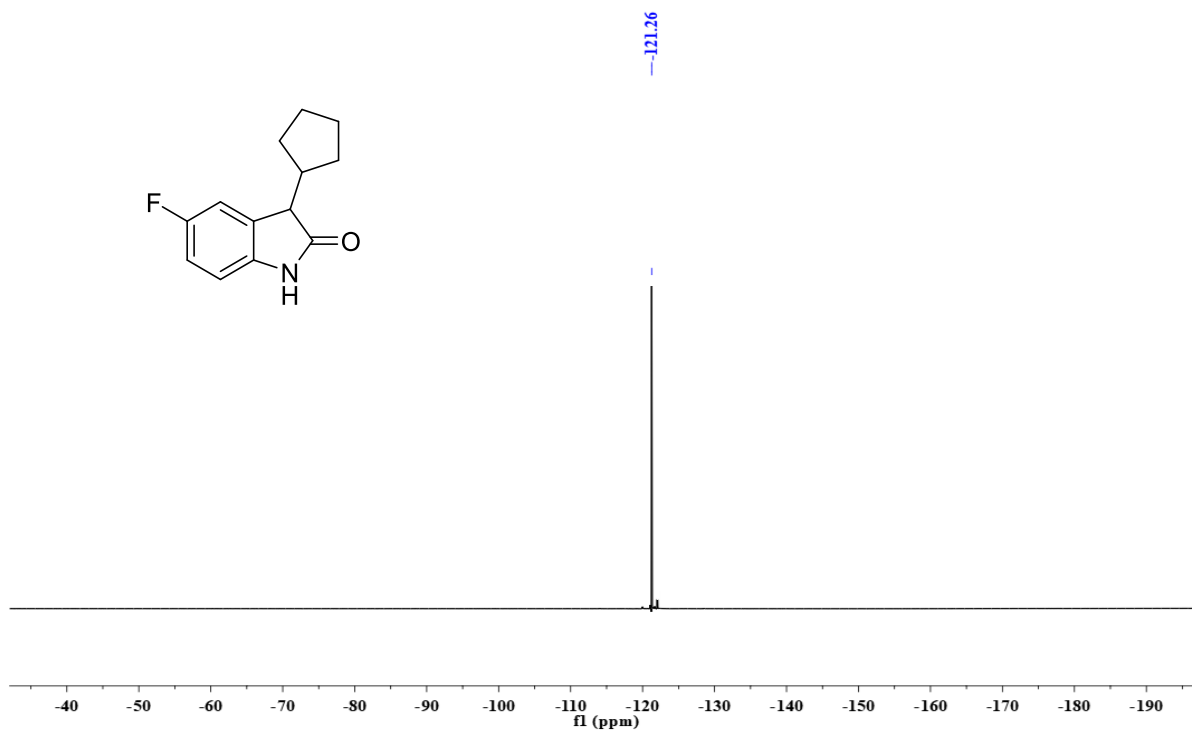

**Figure S47.**  $^{19}\text{F}\{^1\text{H}\}$  NMR (377 MHz,  $\text{CDCl}_3$ ) of 3-cyclopentyl-5-fluoroindolin-2-one (**P23**).

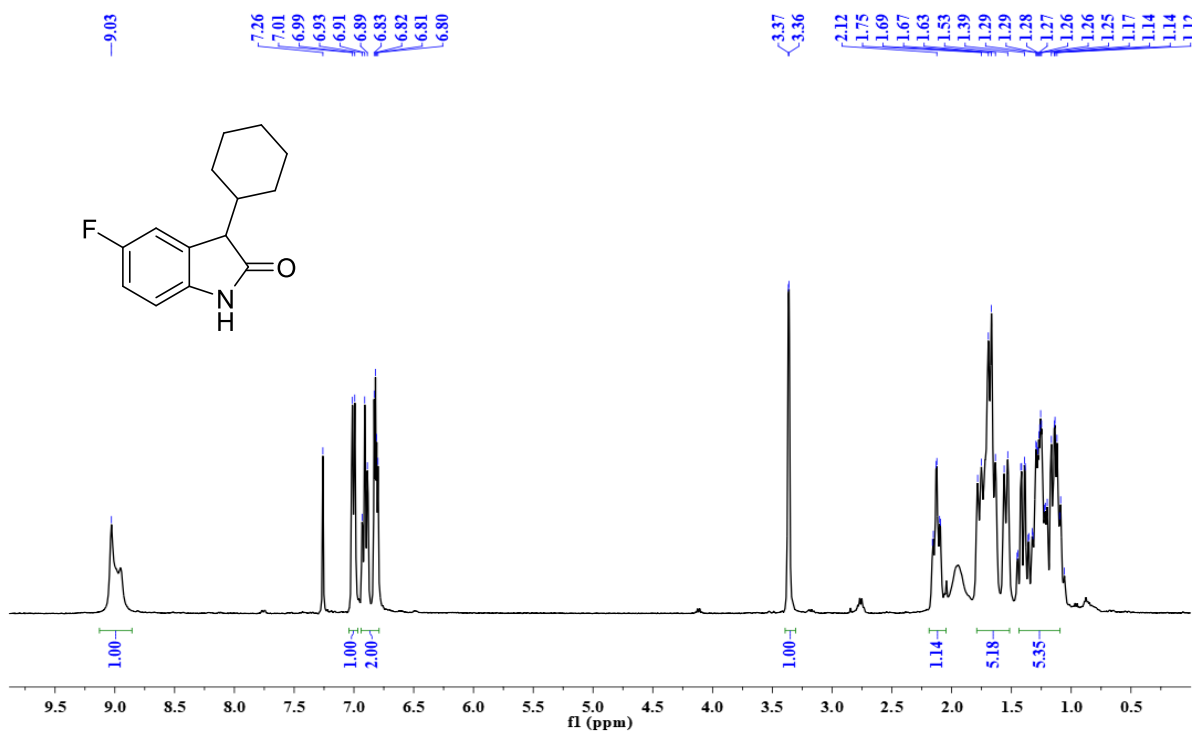

**Figure S48.**  $^1\text{H}$  NMR (400 MHz,  $\text{CDCl}_3$ ) of 3-cyclohexyl-5-fluoroindolin-2-one (**P24**).

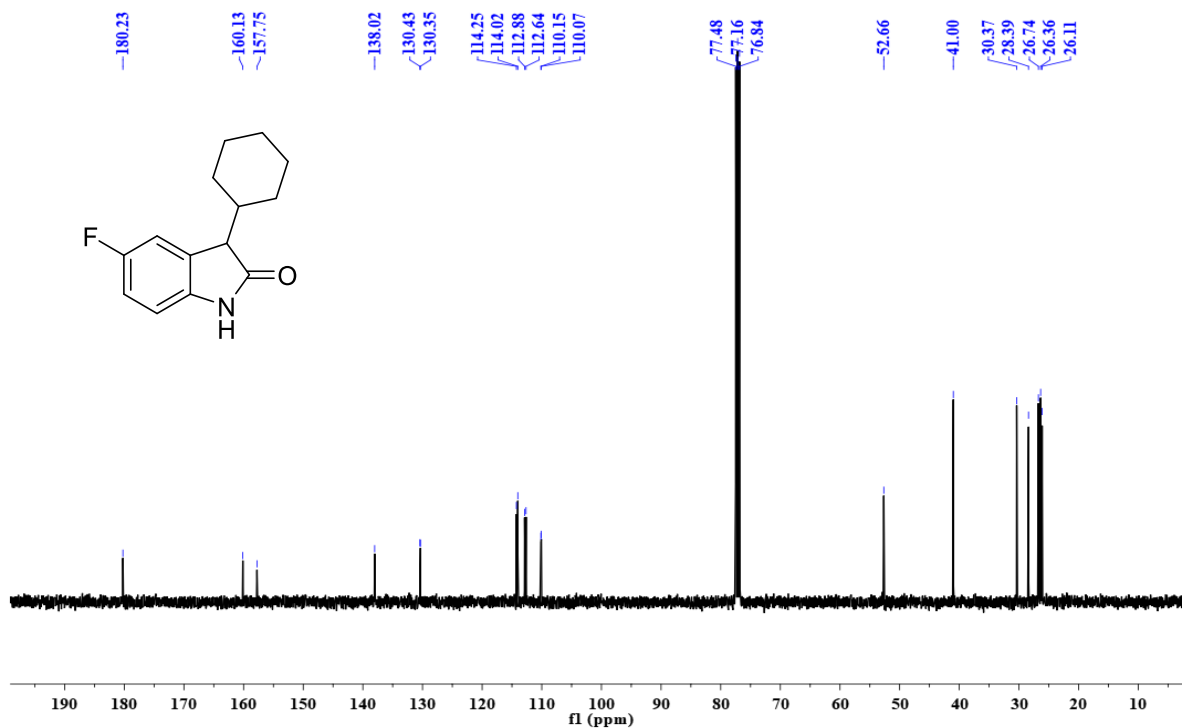

**Figure S49.**  $^{13}\text{C}\{^1\text{H}\}$  NMR (101 MHz,  $\text{CDCl}_3$ ) of 3-cyclohexyl-5-fluoroindolin-2-one (**P24**).

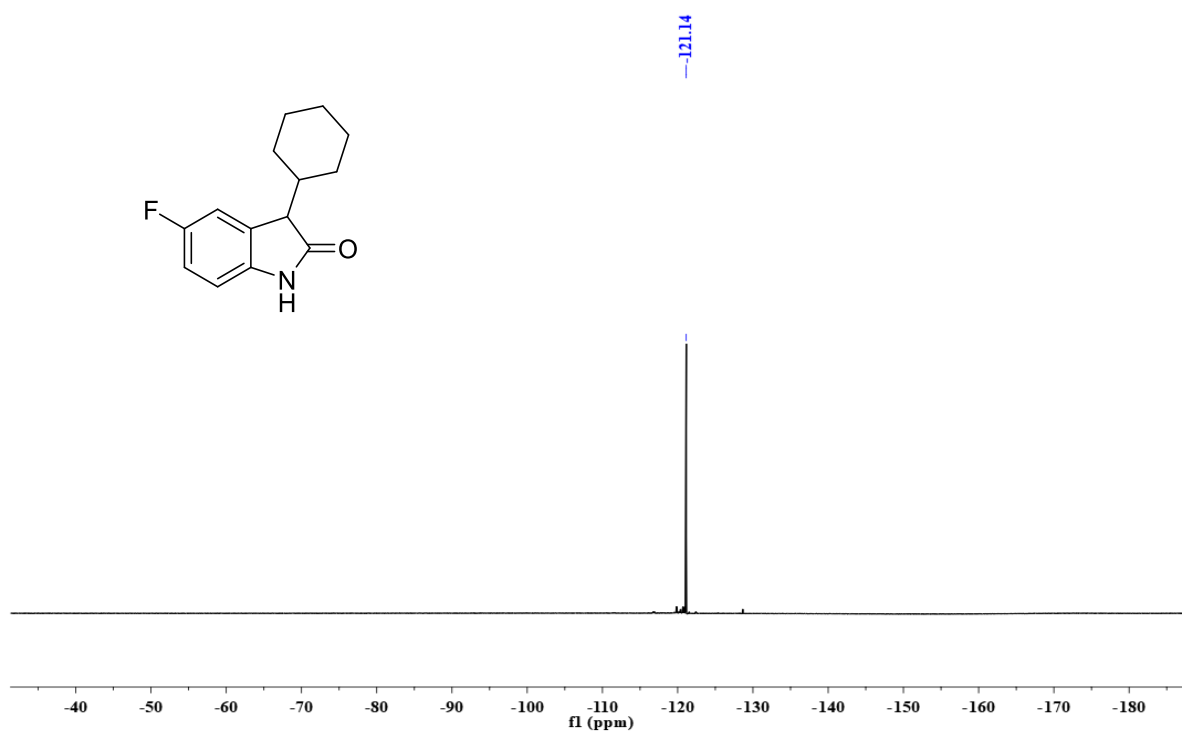

**Figure S50.**  $^{19}\text{F}\{^1\text{H}\}$  NMR (377 MHz,  $\text{CDCl}_3$ ) of 3-cyclohexyl-5-fluoroindolin-2-one (**P24**).



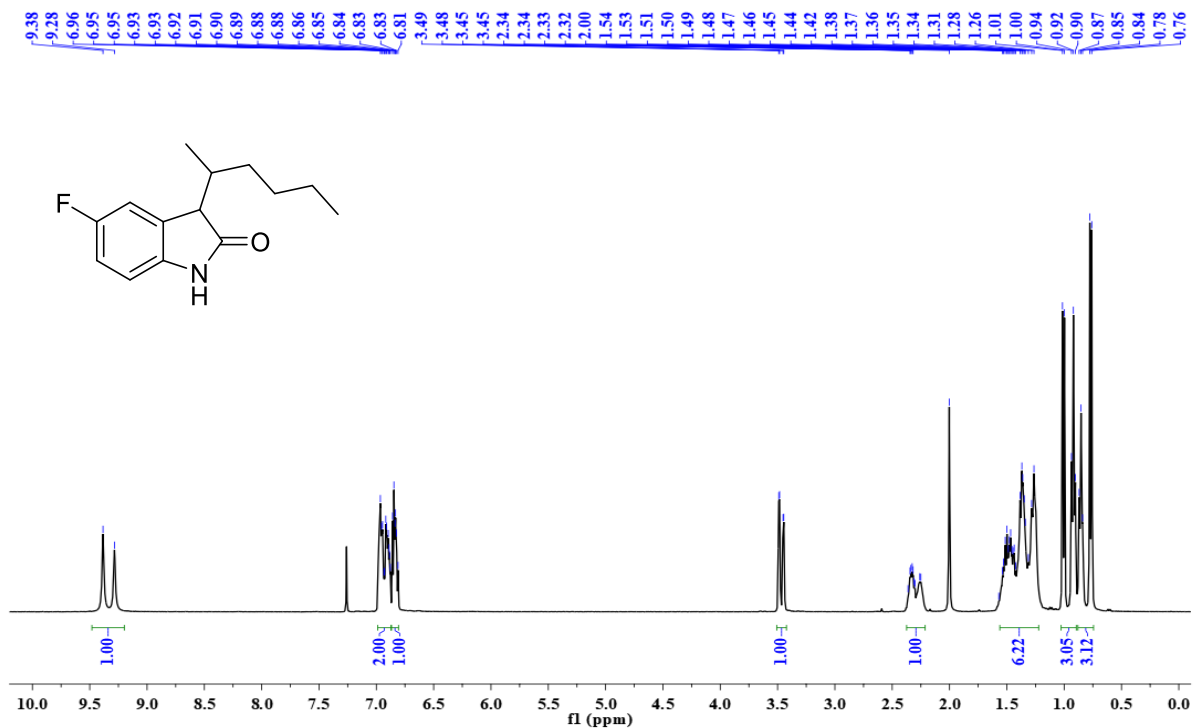

Figure S53. <sup>1</sup>H NMR (400 MHz, CDCl<sub>3</sub>) of 5-fluoro-3-(hexan-2-yl)indolin-2-one (P<sub>26</sub>).

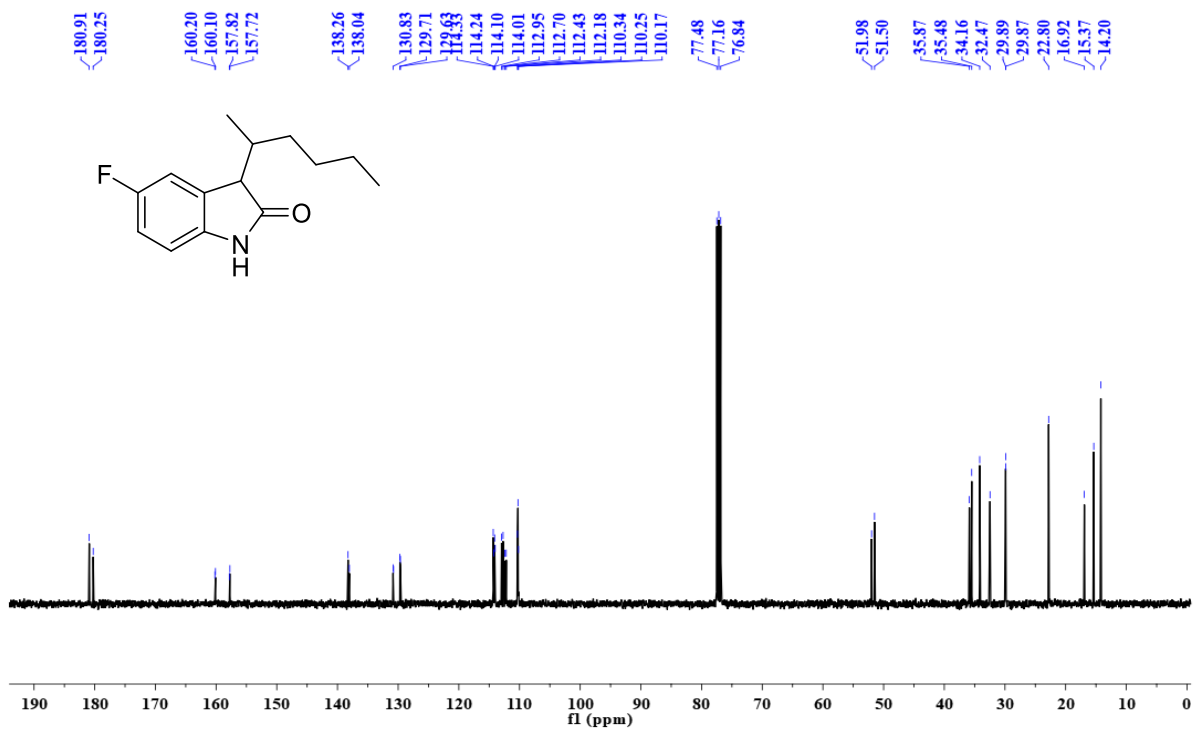

Figure S54. <sup>13</sup>C{<sup>1</sup>H} NMR (101 MHz, CDCl<sub>3</sub>) of 5-fluoro-3-(hexan-2-yl)indolin-2-one (P<sub>26</sub>).

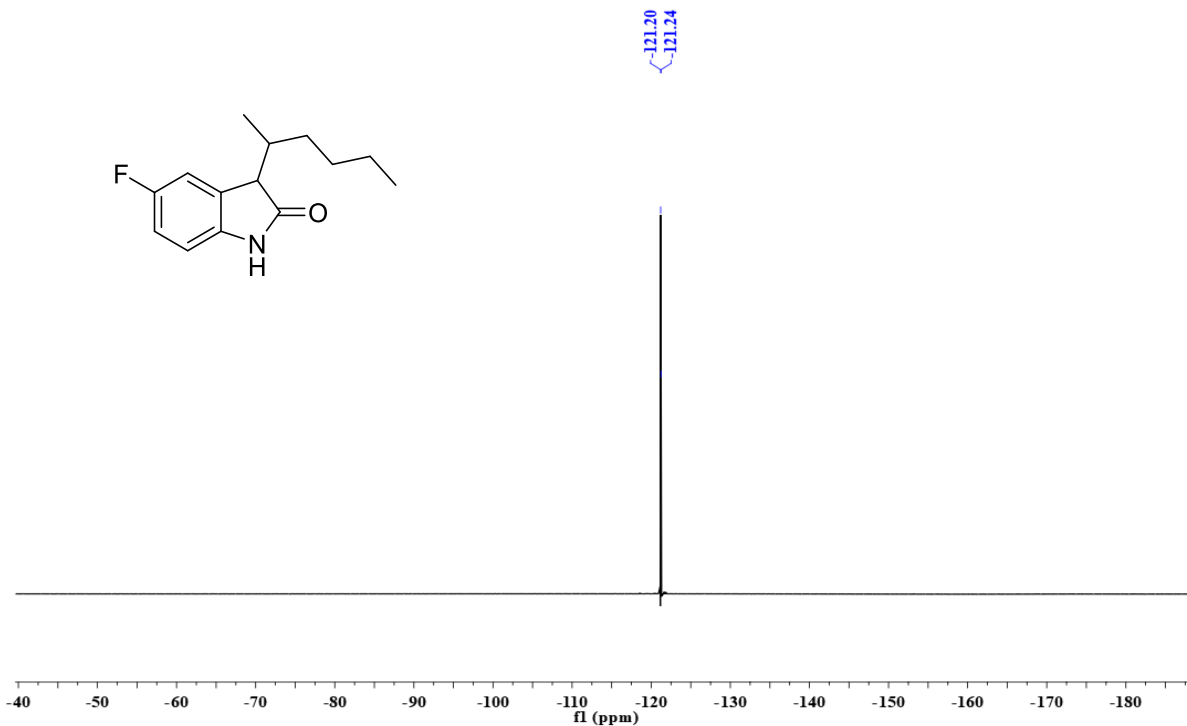

**Figure S55.**  $^{19}\text{F}$   $\{^1\text{H}\}$  NMR (377 MHz,  $\text{CDCl}_3$ ) of 5-fluoro-3-(hexan-2-yl)indolin-2-one (P26).

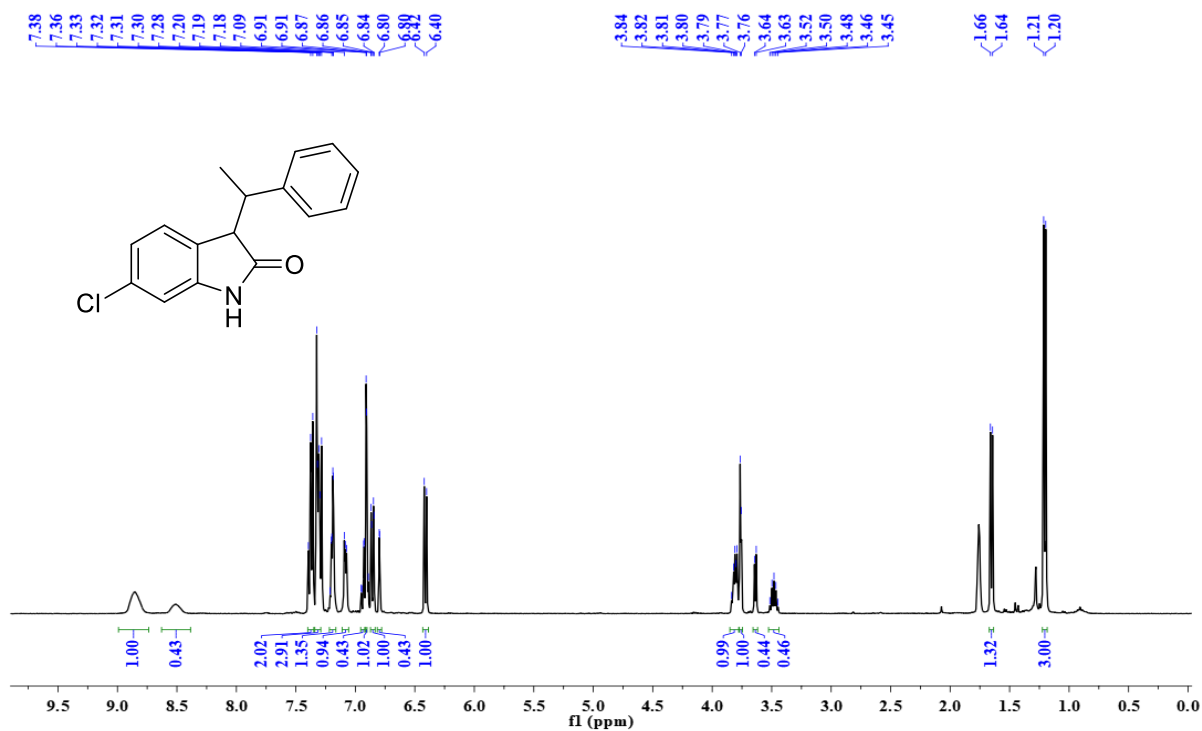

**Figure S56.**  $^1\text{H}$  NMR (400 MHz,  $\text{CDCl}_3$ ) of 6-chloro-3-(1-phenylethyl)indolin-2-one (P27).



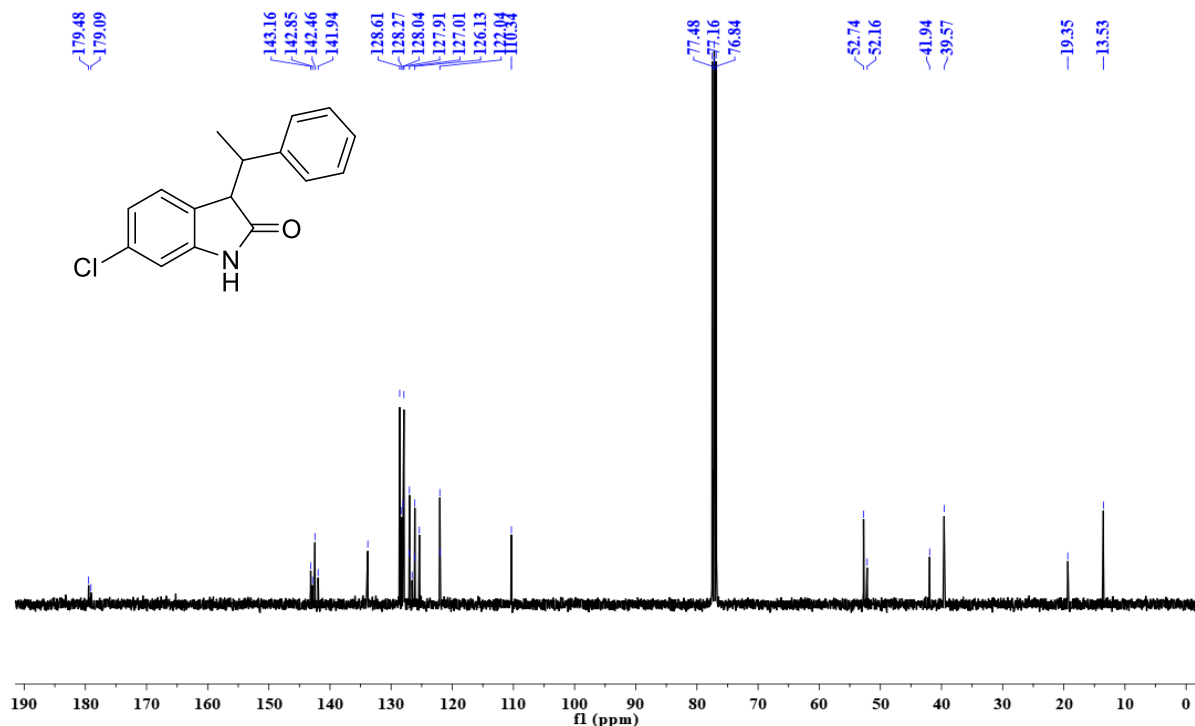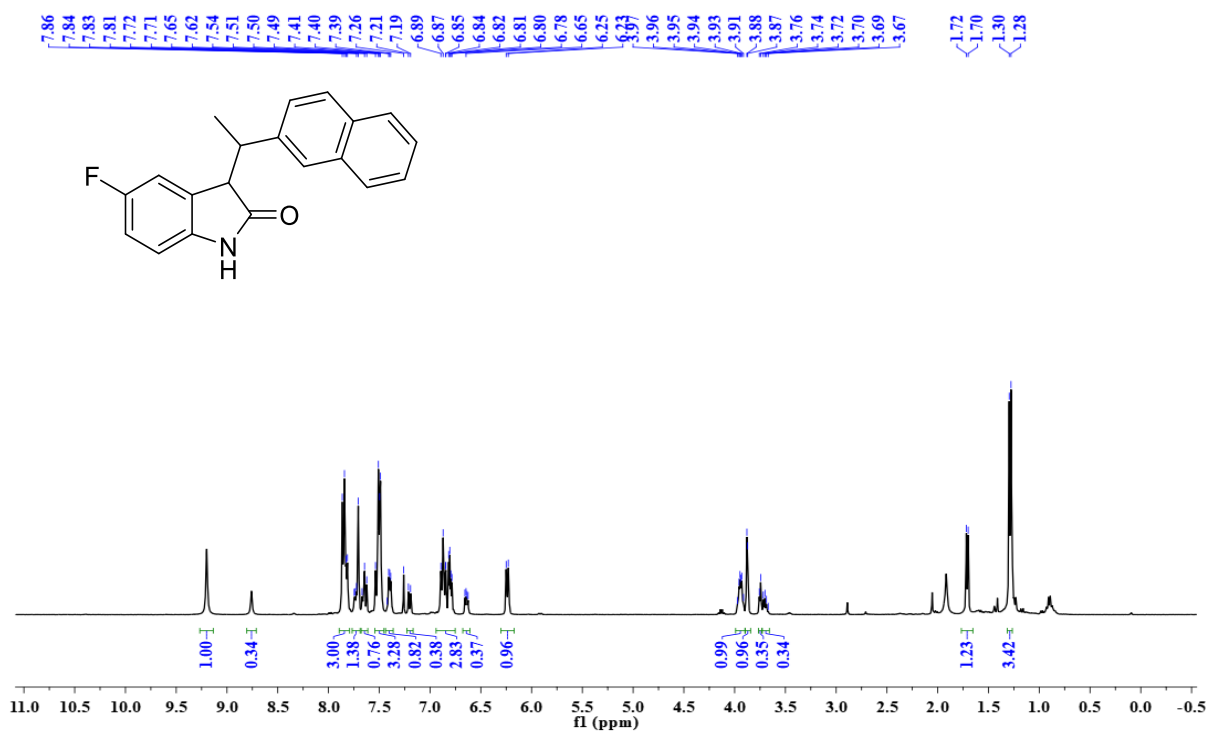

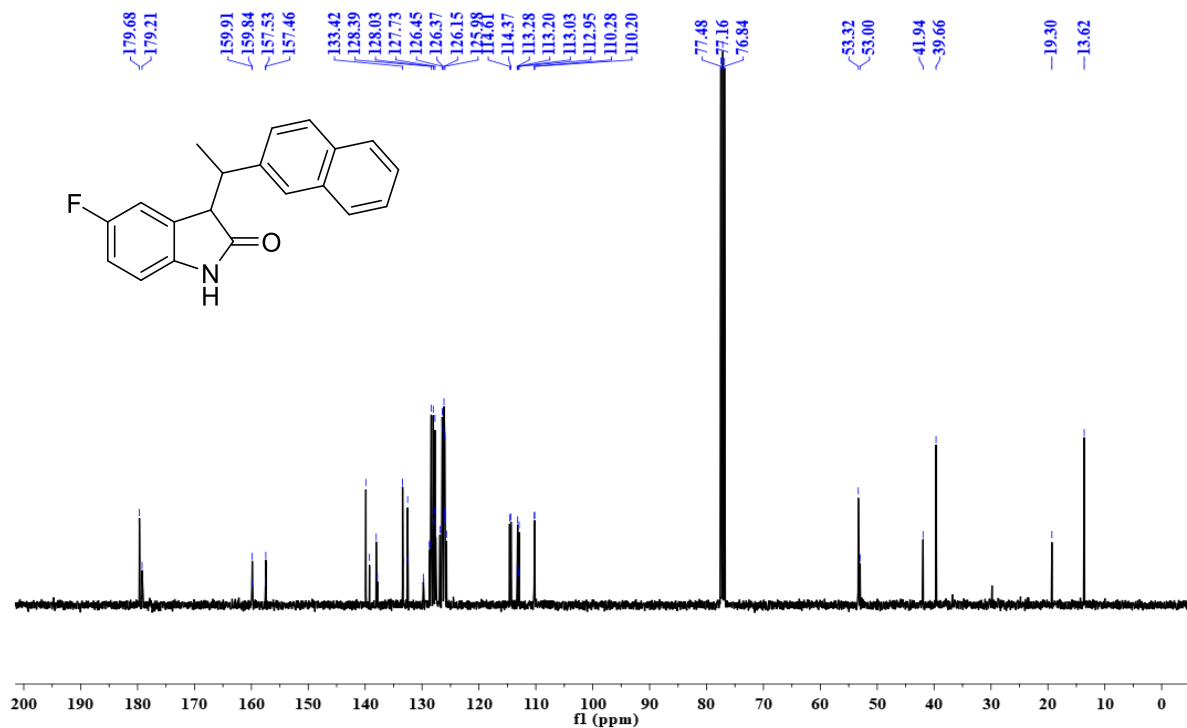

**Figure S59.**  $^1\text{H}$  NMR (400 MHz,  $\text{CDCl}_3$ ) of 5-fluoro-3-(1-(naphthalen-2-yl)ethyl)indolin-2-one (P28).

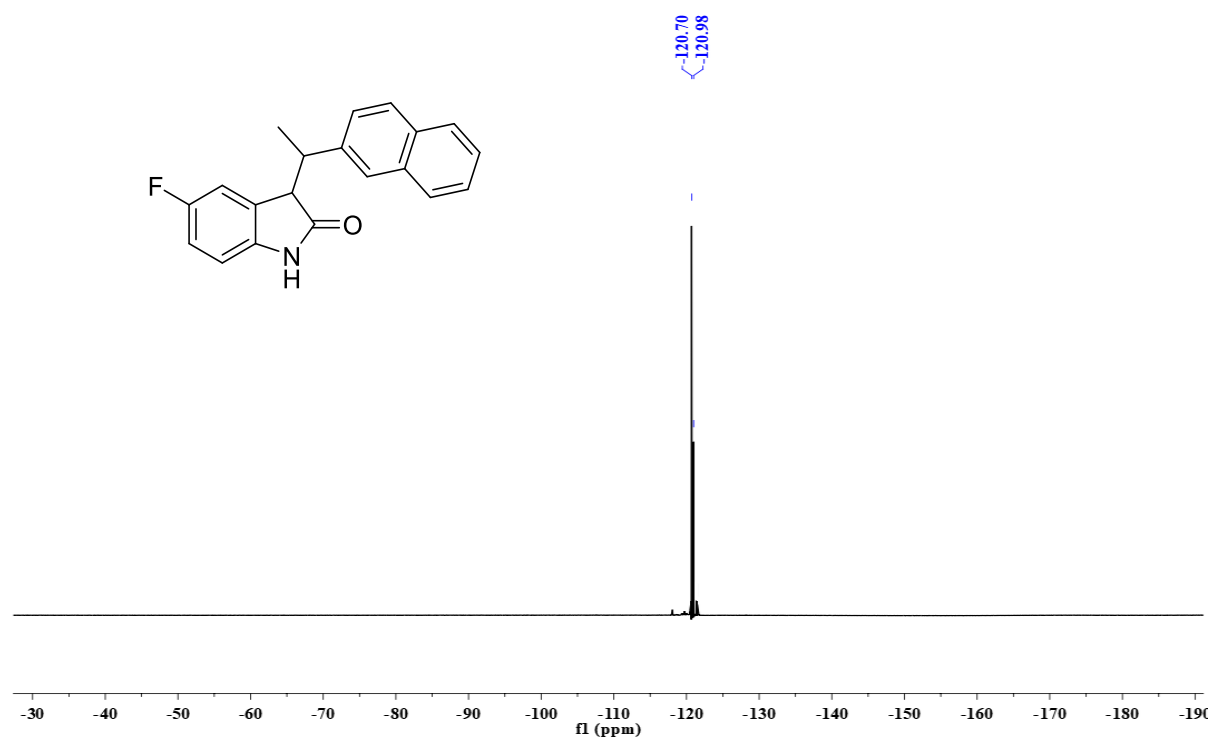

**Figure S60.**  $^{19}\text{F}\{^1\text{H}\}$  NMR (377 MHz,  $\text{CDCl}_3$ ) of 5-fluoro-3-(1-(naphthalen-2-yl)ethyl)indolin-2-one (P28).

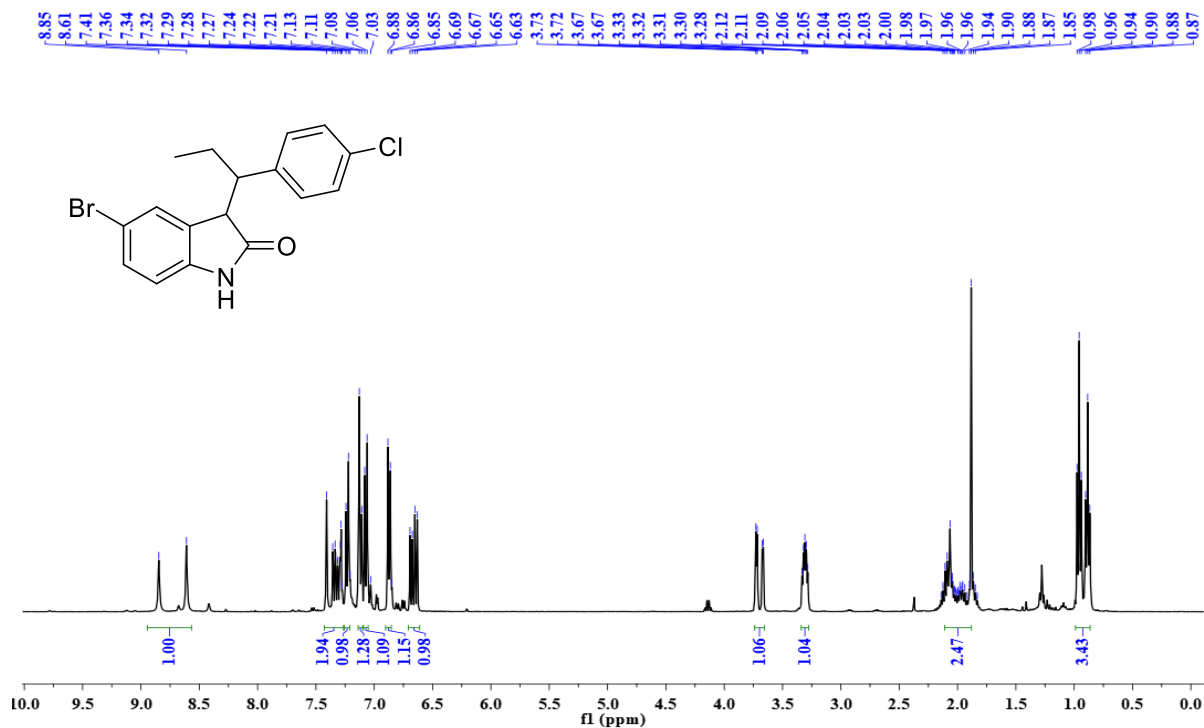

**Figure S61.** <sup>1</sup>H NMR (400 MHz, CDCl<sub>3</sub>) of 5-bromo-3-(1-(4-chlorophenyl)propyl)indolin-2-one (P<sub>29</sub>).

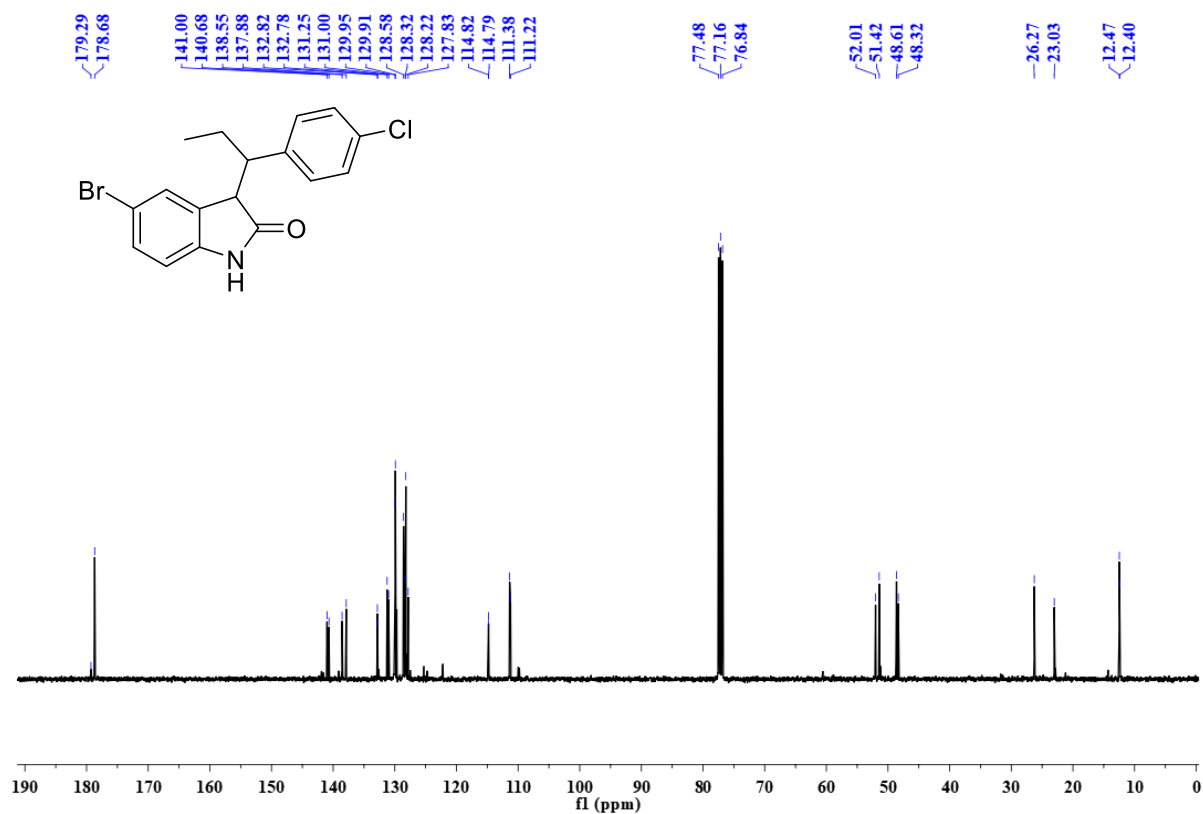

**Figure S62.** <sup>13</sup>C{<sup>1</sup>H} NMR (101 MHz, CDCl<sub>3</sub>) of 5-bromo-3-(1-(4-chlorophenyl)propyl)indolin-2-one (P<sub>29</sub>).

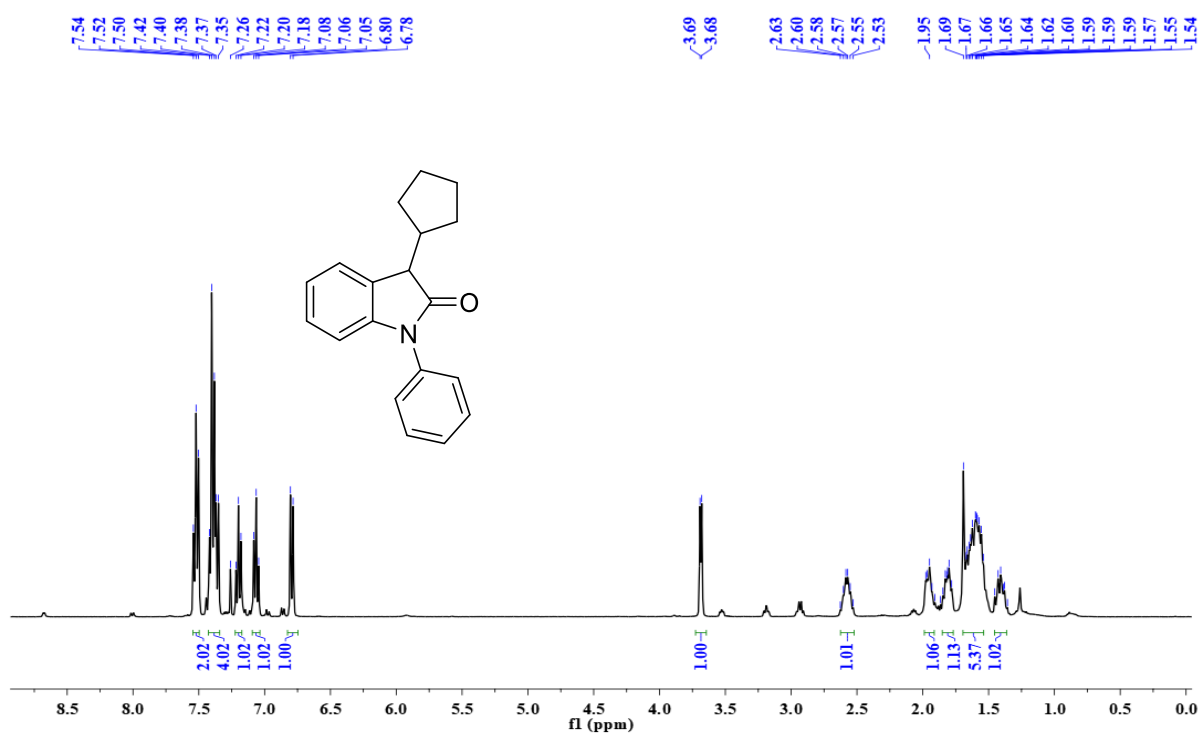

Figure S63. <sup>1</sup>H NMR (400 MHz, CDCl<sub>3</sub>) of 3-cyclopentyl-1-phenylindolin-2-one (P30).

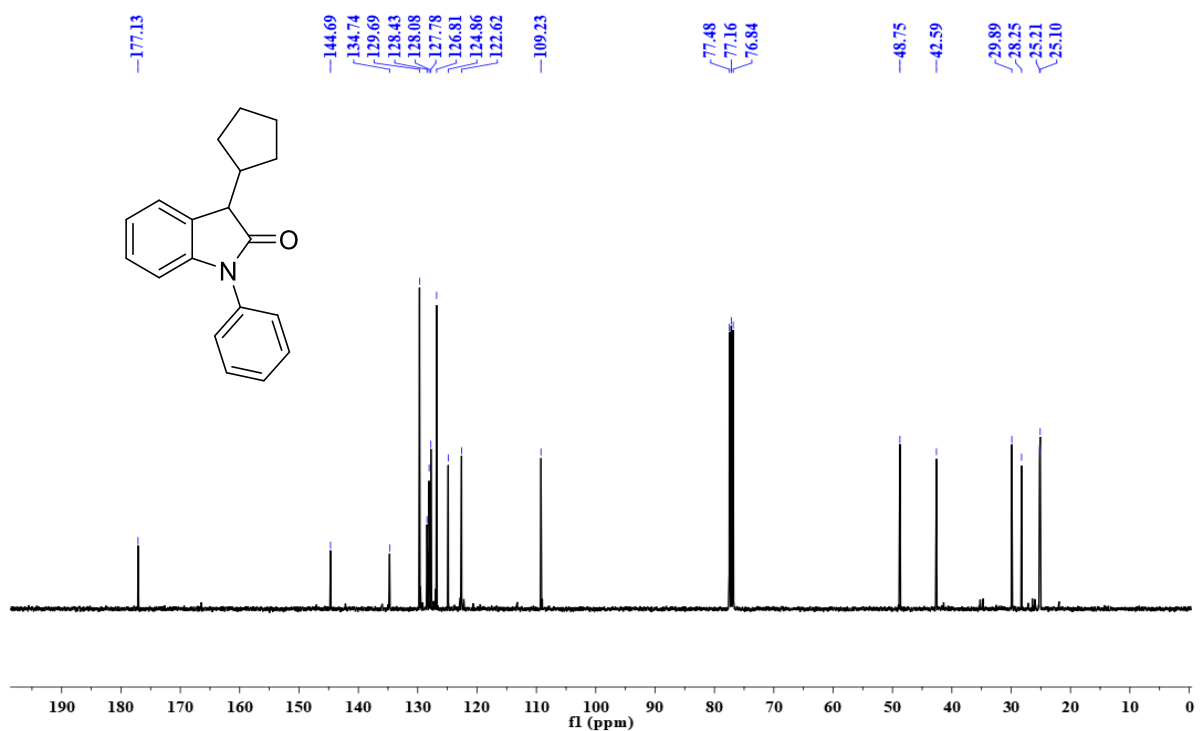

Figure S64. <sup>13</sup>C {<sup>1</sup>H} NMR (101 MHz, CDCl<sub>3</sub>) of 3-cyclopentyl-1-phenylindolin-2-one (P30).

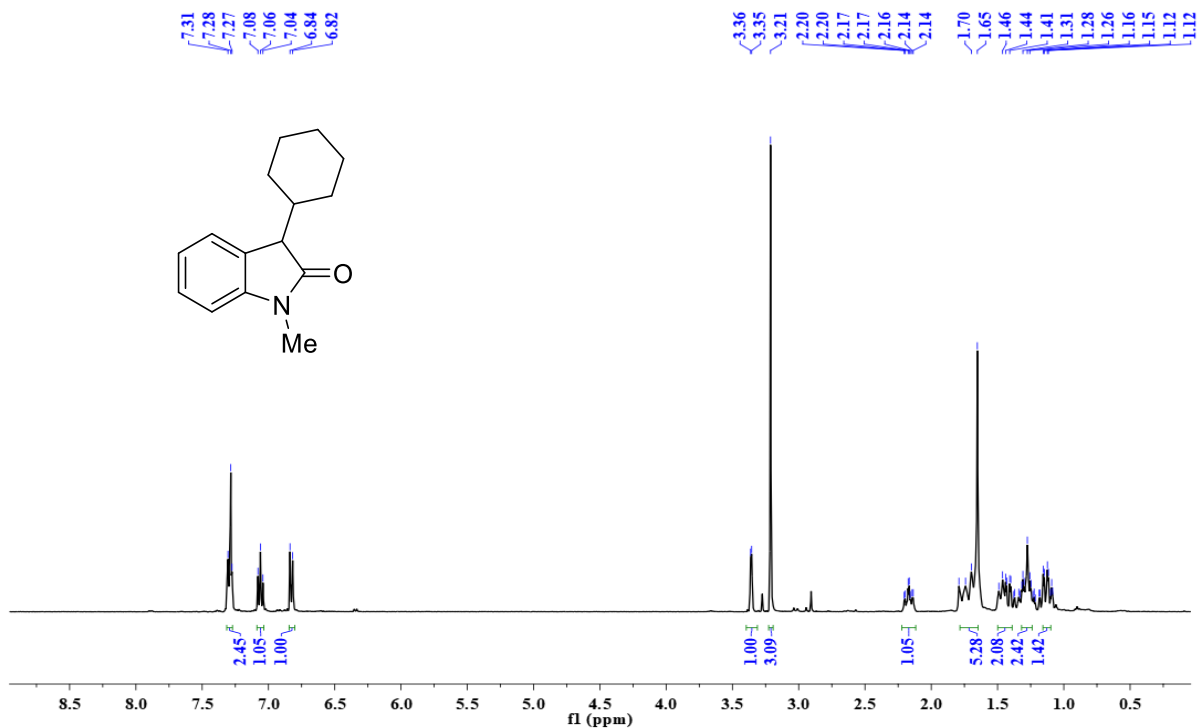

Figure S65. <sup>1</sup>H NMR (400 MHz, CDCl<sub>3</sub>) of 3-cyclohexyl-1-methylindolin-2-one (P<sub>31</sub>).

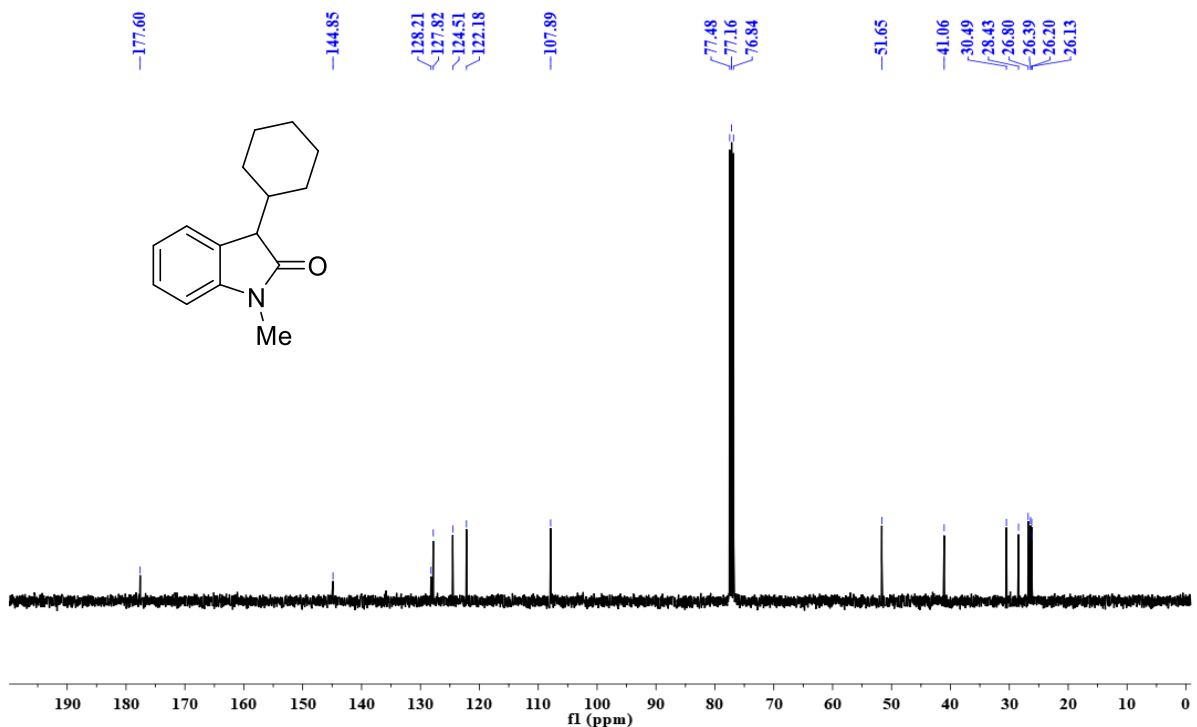

Figure S66. <sup>13</sup>C{<sup>1</sup>H} NMR (101 MHz, CDCl<sub>3</sub>) of 3-cyclohexyl-1-methylindolin-2-one (P<sub>31</sub>).

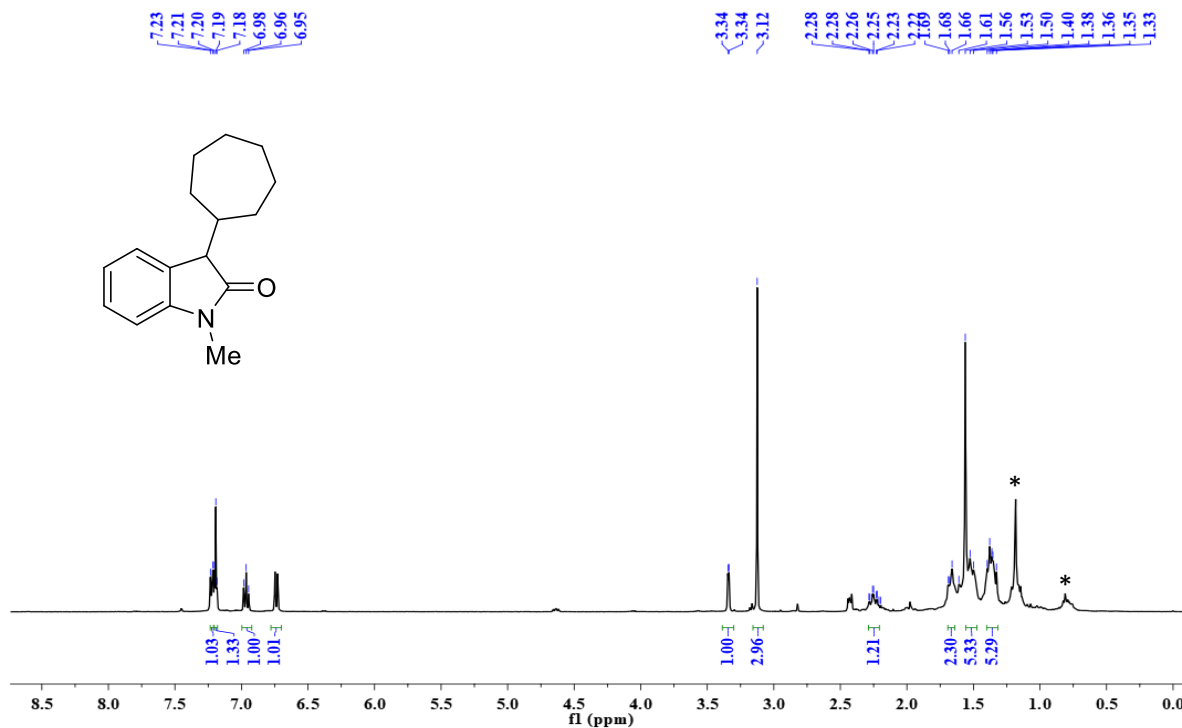

**Figure S67.** <sup>1</sup>H NMR (400 MHz, CDCl<sub>3</sub>) of 3-cycloheptyl-1-methylindolin-2-one (**P**<sub>32</sub>) (\* is H-grease).

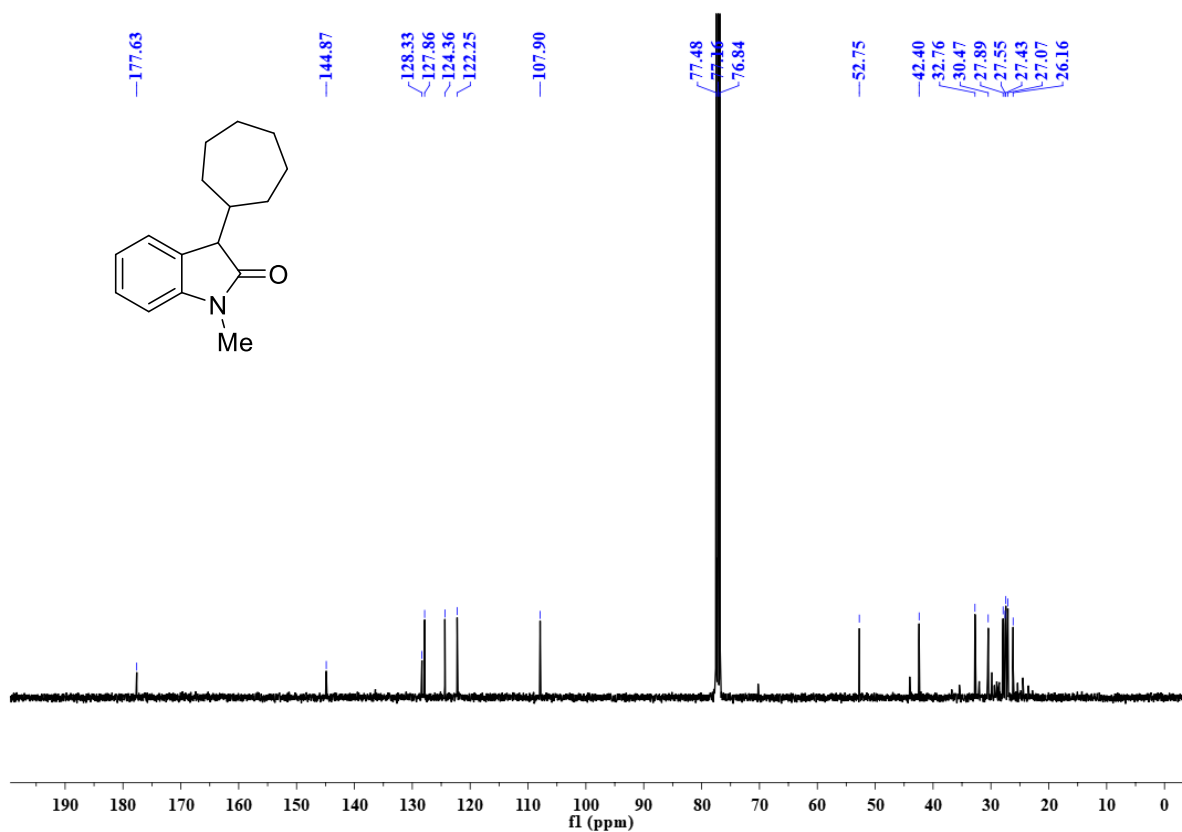

**Figure S68.** <sup>13</sup>C{<sup>1</sup>H} NMR (101 MHz, CDCl<sub>3</sub>) of 3-cycloheptyl-1-methylindolin-2-one (**P**<sub>32</sub>).

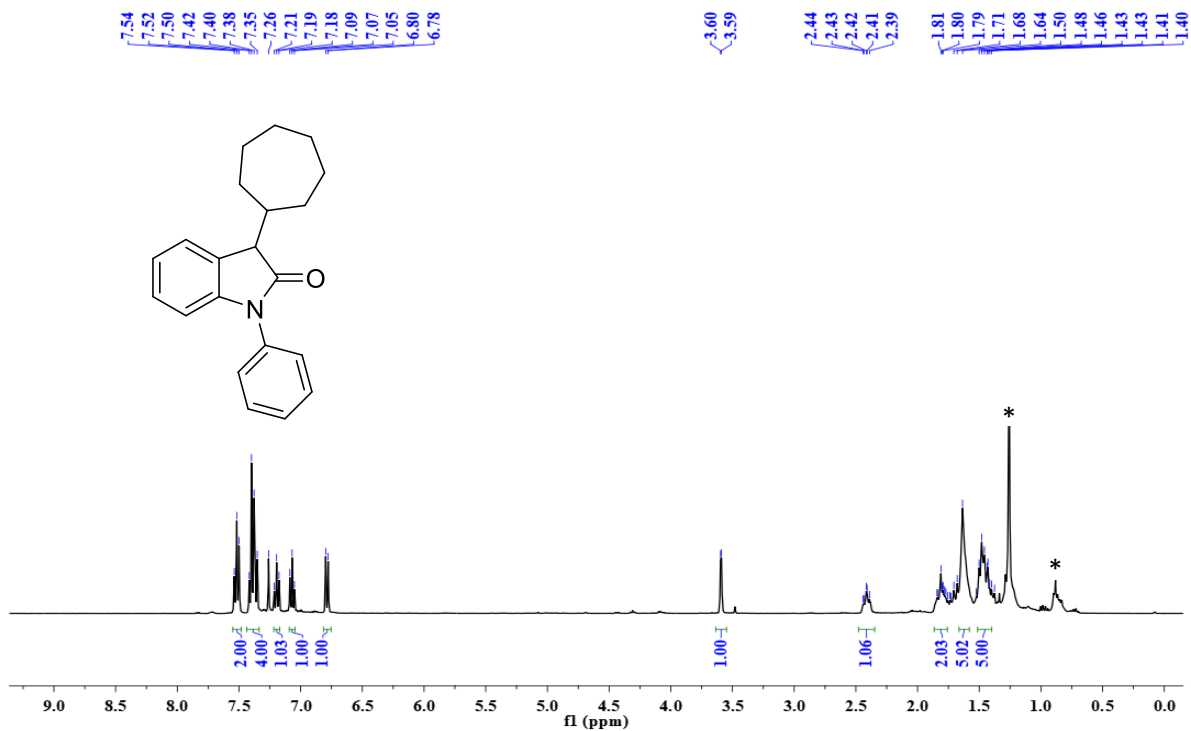

**Figure S69.** <sup>1</sup>H NMR (400 MHz, CDCl<sub>3</sub>) of 3-cycloheptyl-1-phenylindolin-2-one (P33) (\* is H-grease).

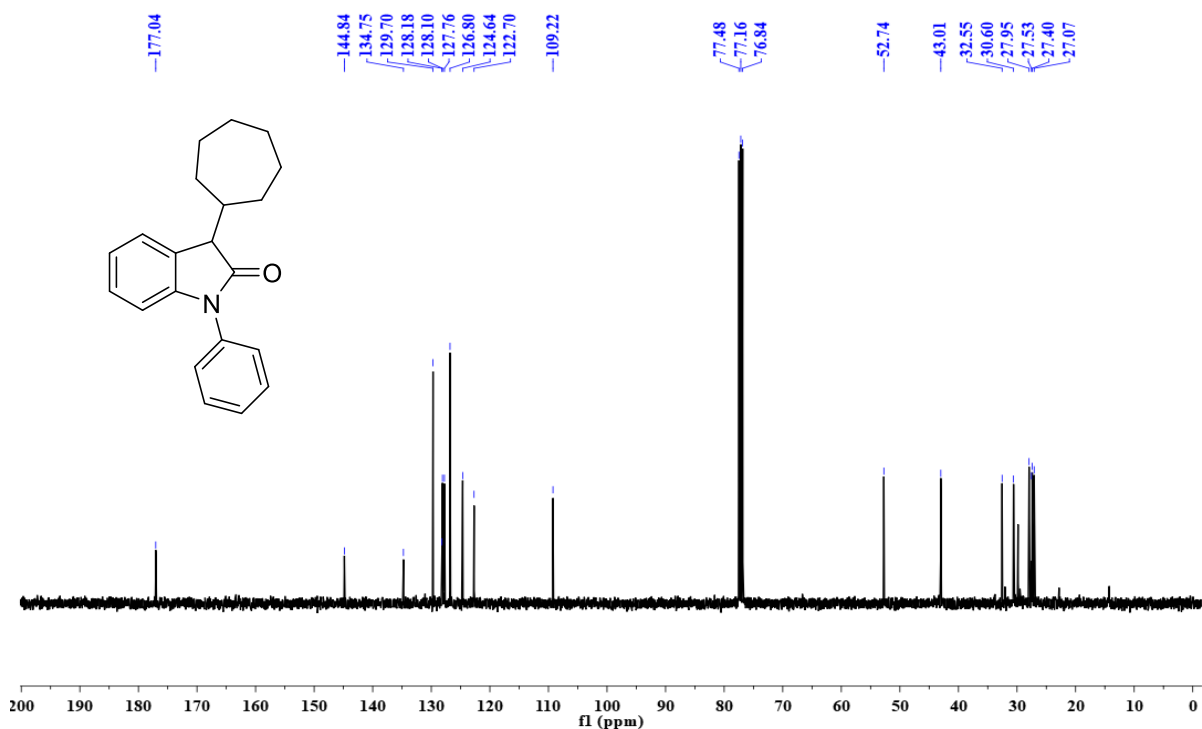

**Figure S70.** <sup>13</sup>C{<sup>1</sup>H} NMR (101 MHz, CDCl<sub>3</sub>) of 3-cycloheptyl-1-phenylindolin-2-one (P33).

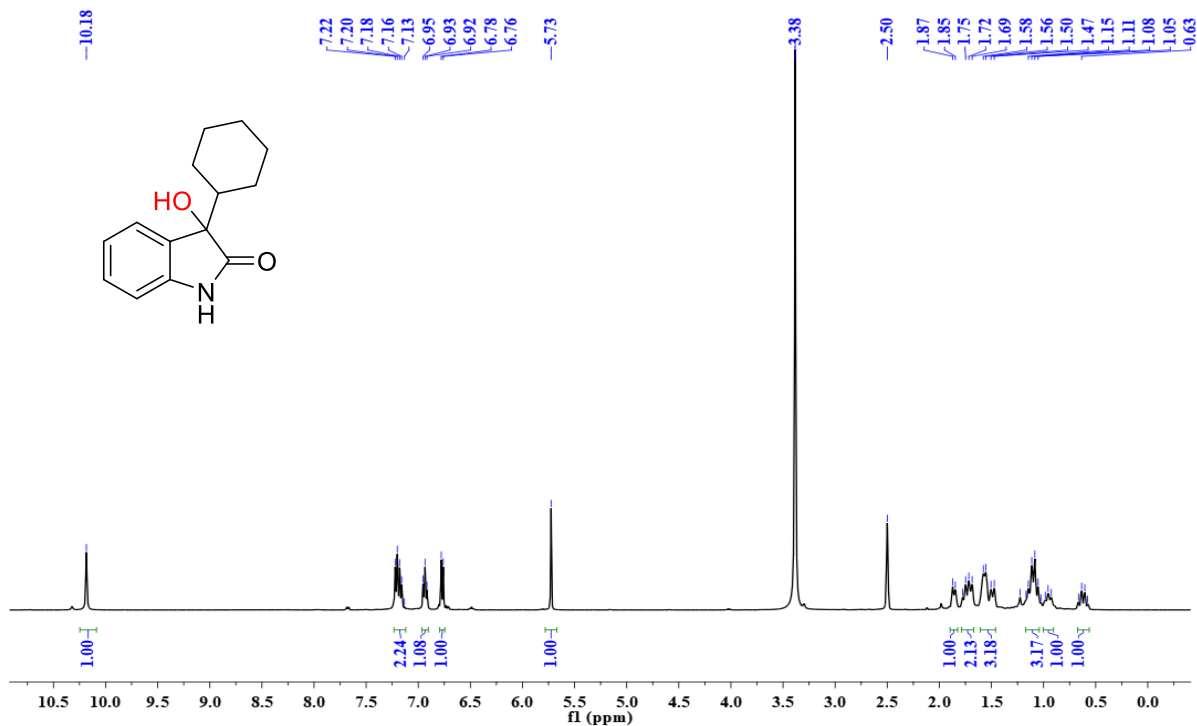

**Figure S71.**  $^1\text{H}$  NMR (400 MHz,  $\text{DMSO-}d_6$ ) of 3-cyclohexyl-3-hydroxyindolin-2-one (P34).

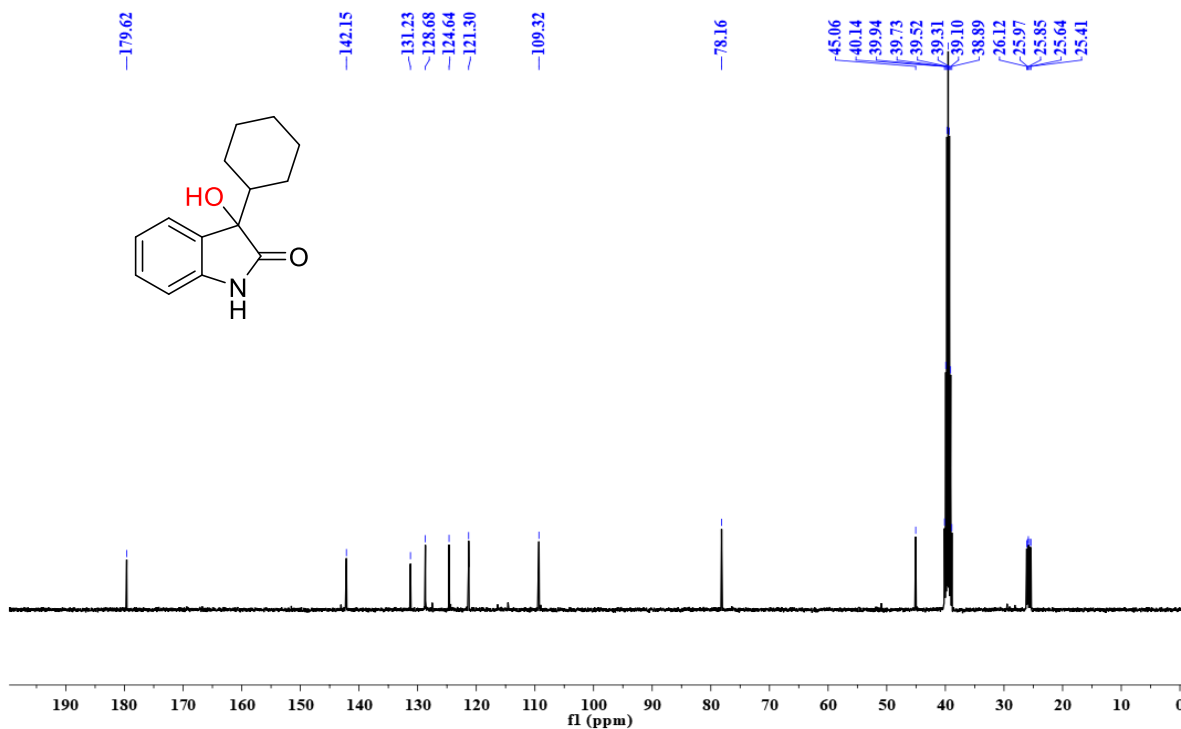

**Figure S72.**  $^{13}\text{C}\{^1\text{H}\}$  NMR (101 MHz,  $\text{DMSO-}d_6$ ) of 3-cyclohexyl-3-hydroxyindolin-2-one (P34).



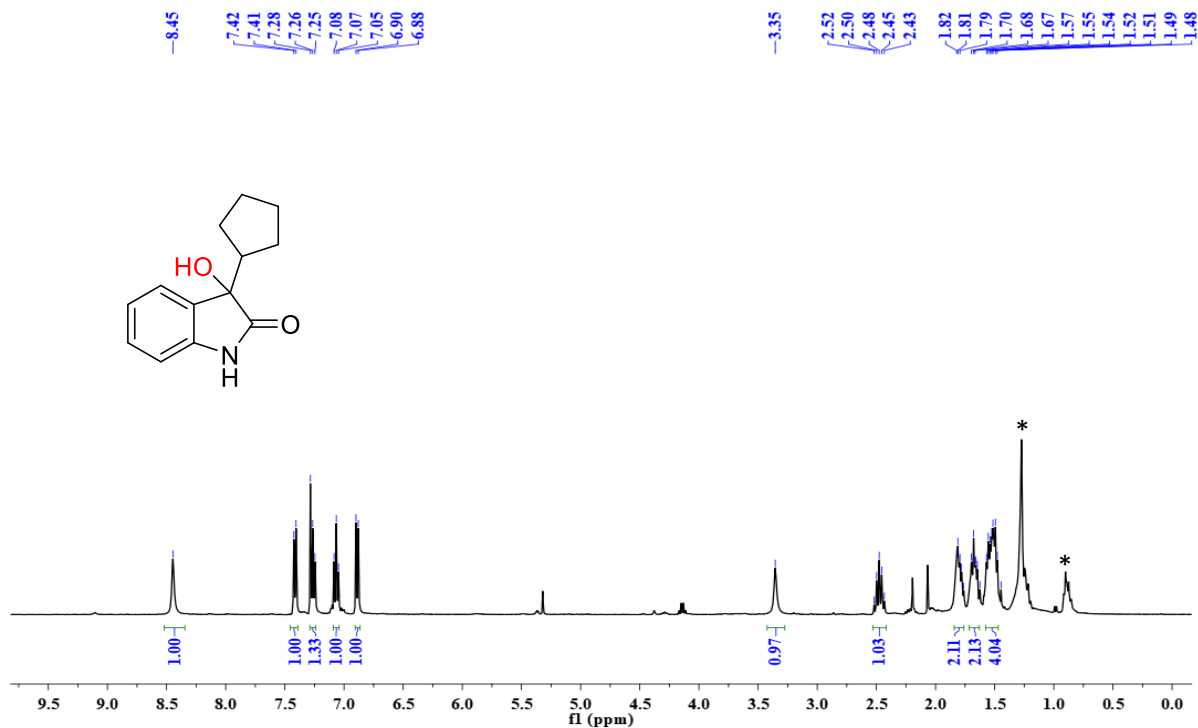

**Figure S73.** <sup>1</sup>H NMR (400 MHz, CDCl<sub>3</sub>) of 3-cyclopentyl-3-hydroxyindolin-2-one (**P35**) (\* is H-grease).

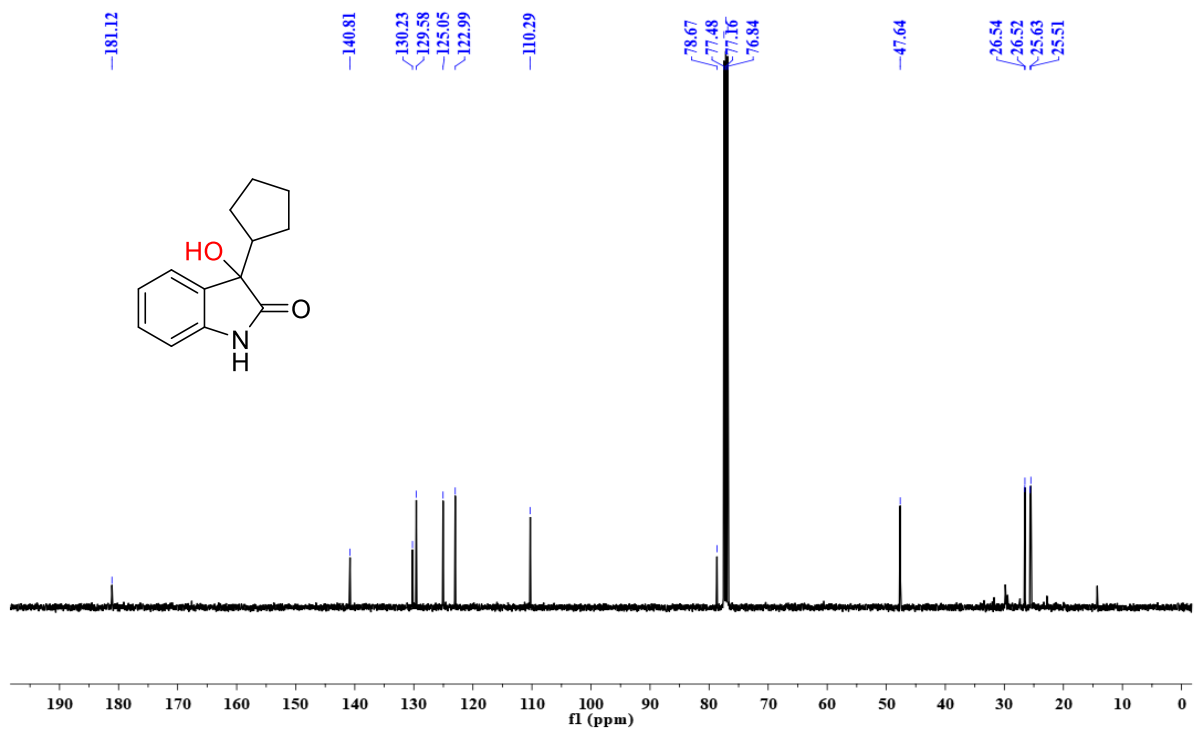

**Figure S74.** <sup>13</sup>C{<sup>1</sup>H} NMR (101 MHz, CDCl<sub>3</sub>) of 3-cyclopentyl-3-hydroxyindolin-2-one (**P35**).

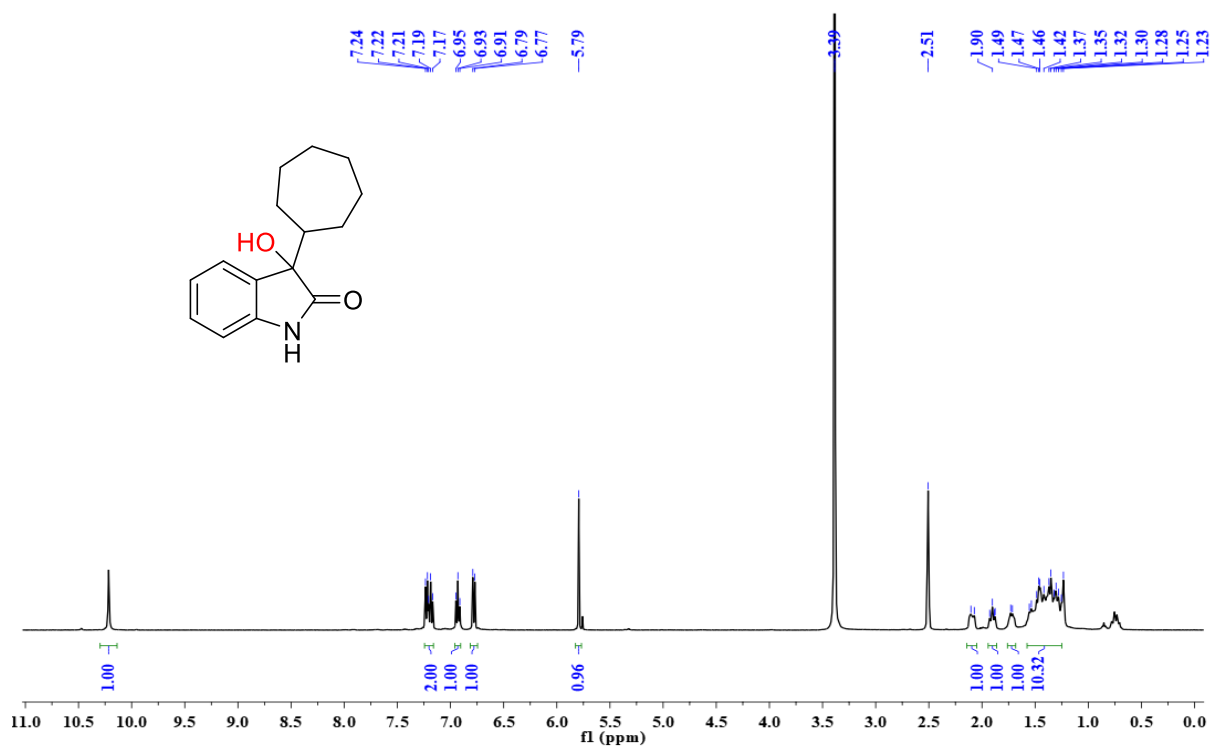

**Figure S75.**  $^1\text{H}$  NMR (400 MHz,  $\text{DMSO-}d_6$ ) of 3-cycloheptyl-3-hydroxyindolin-2-one (P36).

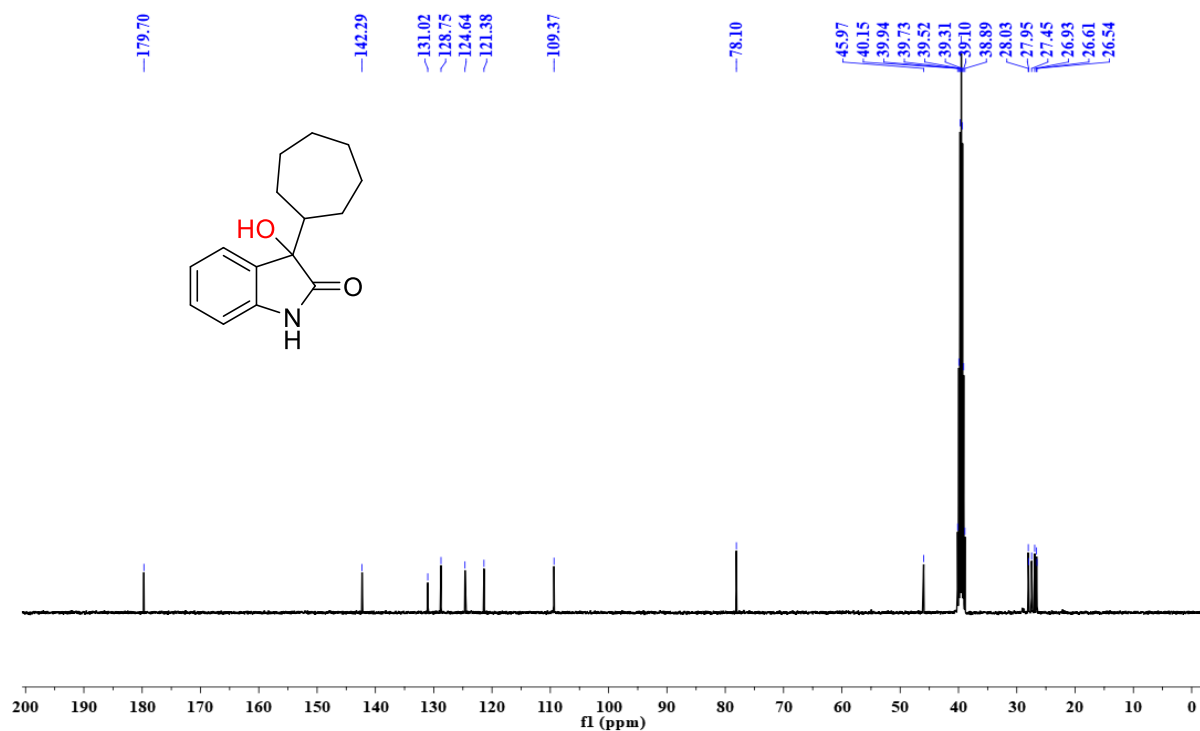

**Figure S76.**  $^{13}\text{C}\{^1\text{H}\}$  NMR (101 MHz,  $\text{DMSO-}d_6$ ) of 3-cycloheptyl-3-hydroxyindolin-2-one (P36).

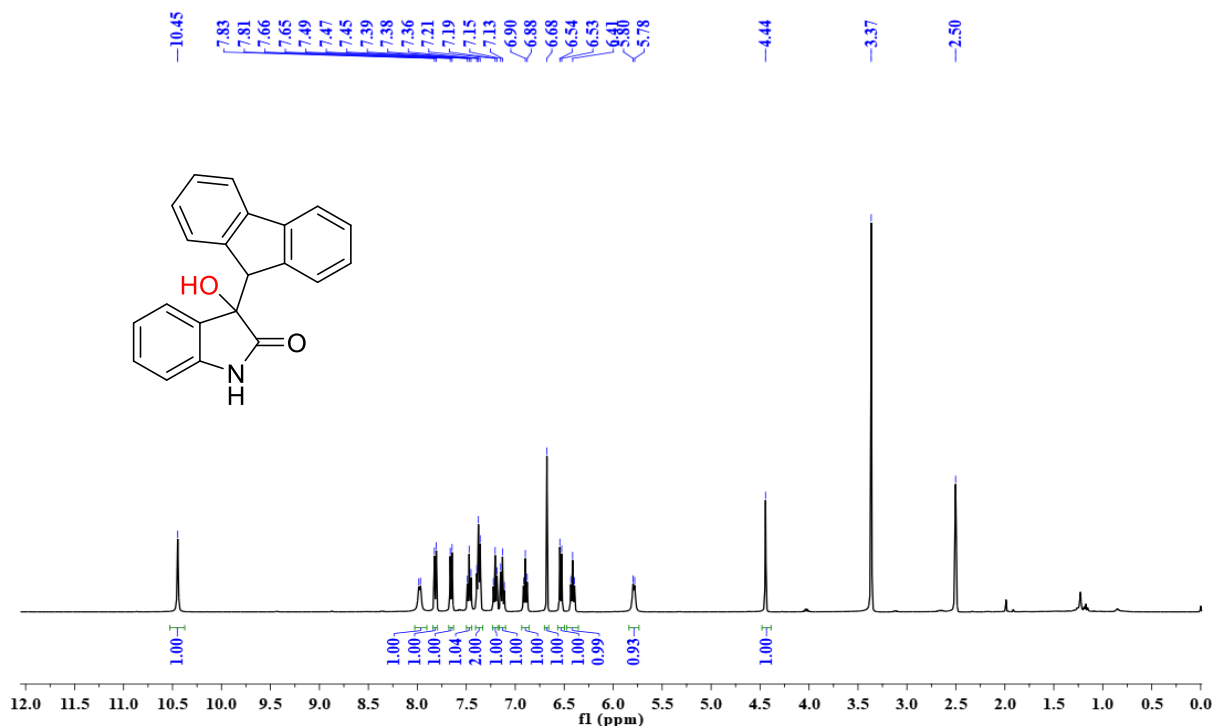

**Figure S77.**  $^1\text{H}$  NMR (400 MHz,  $\text{DMSO-}d_6$ ) of 3-(9H-fluoren-9-yl)-3-hydroxyindolin-2-one (P37).

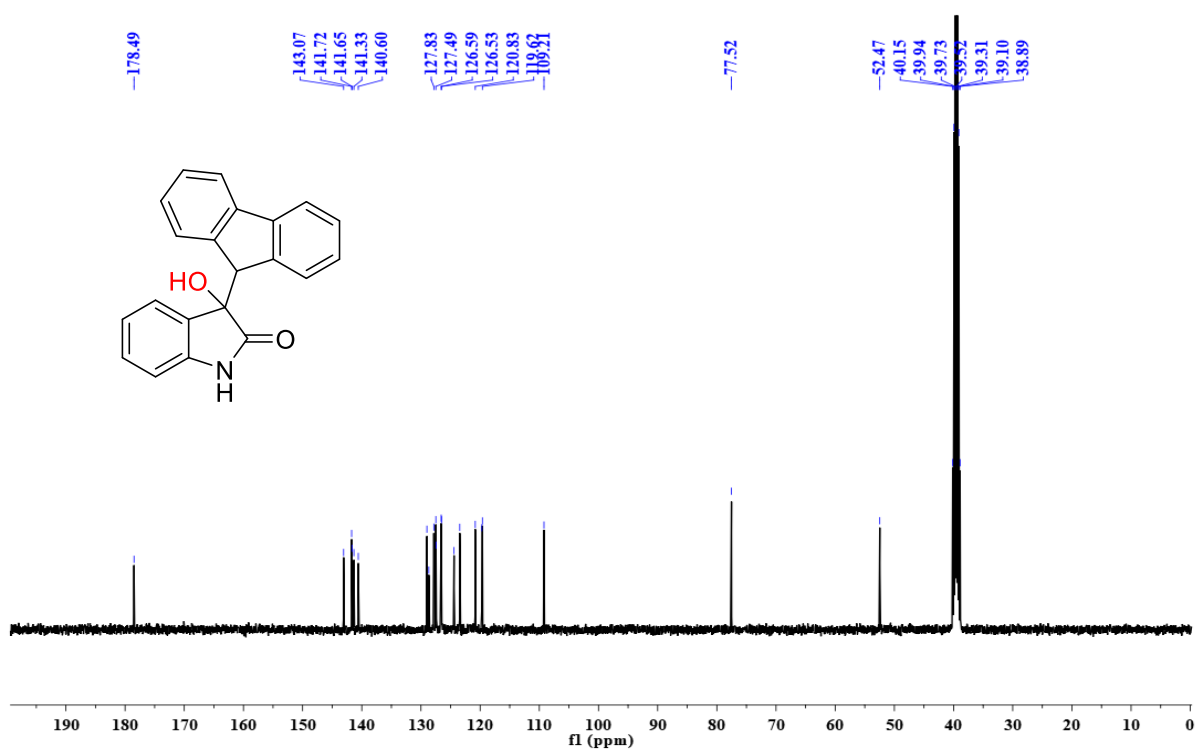

**Figure S78.**  $^{13}\text{C}\{^1\text{H}\}$  NMR (101 MHz,  $\text{DMSO-}d_6$ ) of 3-(9H-fluoren-9-yl)-3-hydroxyindolin-2-one (P37).

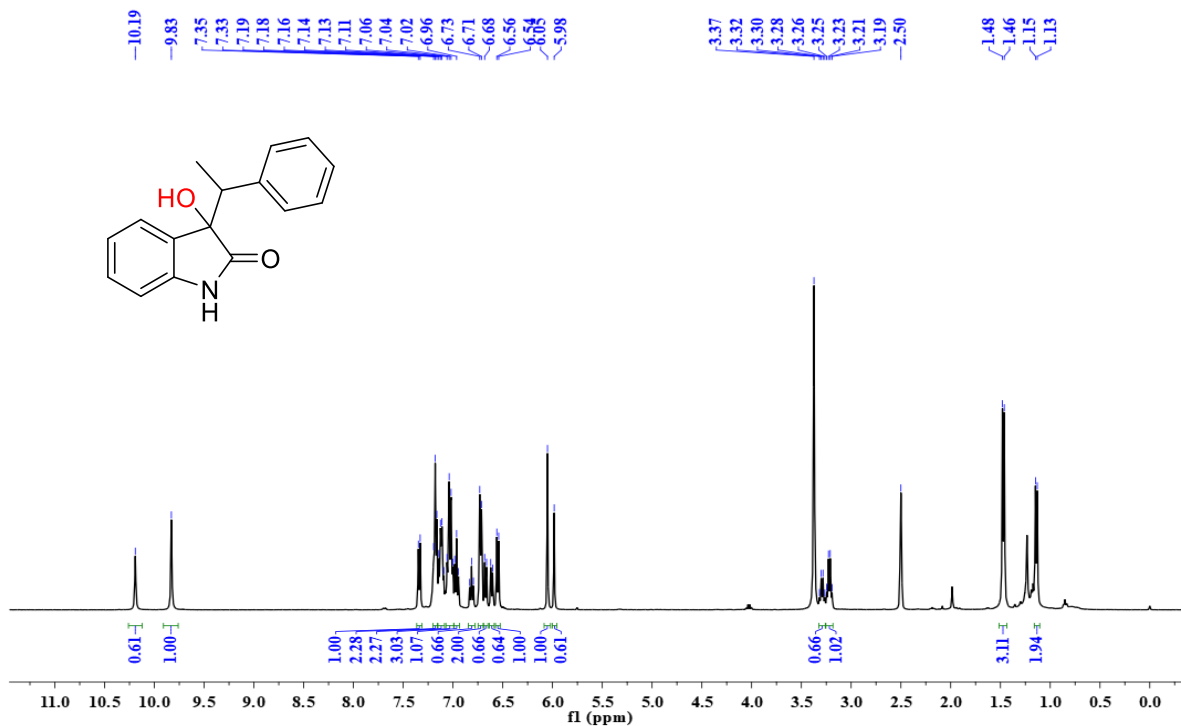

**Figure S79.** <sup>1</sup>H NMR (400 MHz, DMSO-*d*<sub>6</sub>) of 3-hydroxy-3-(1-phenylethyl)indolin-2-one (P38).

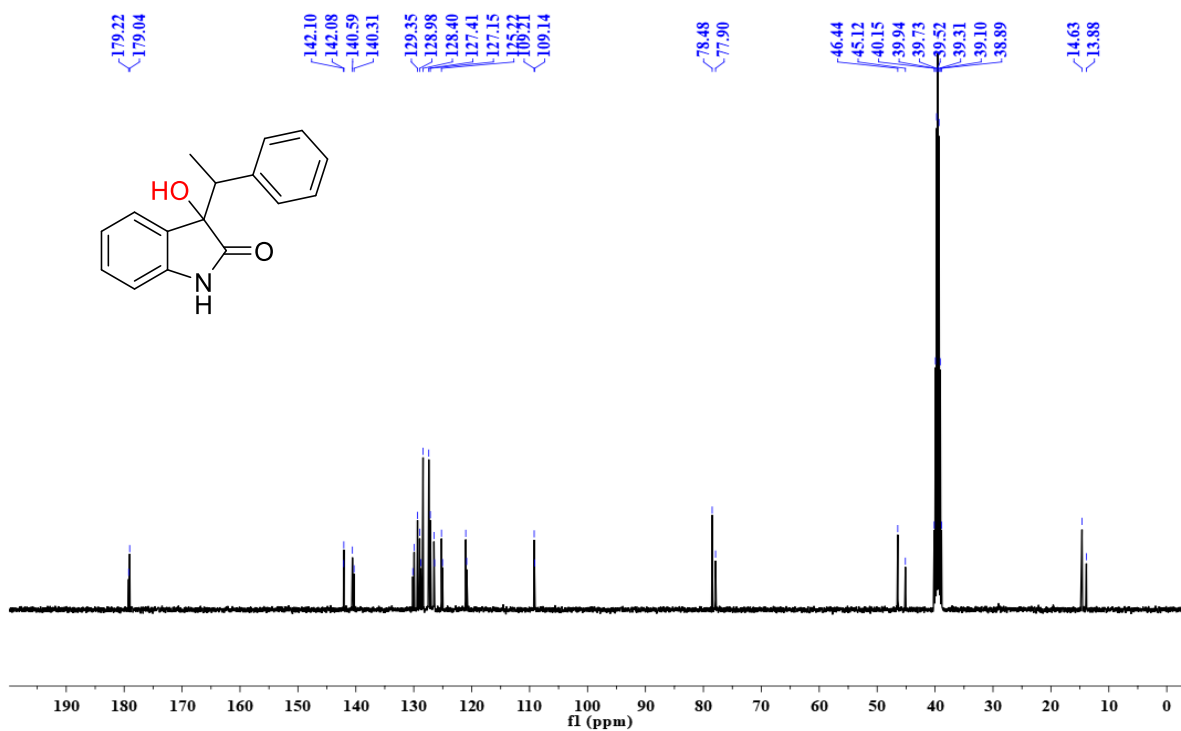

**Figure S80.** <sup>13</sup>C{<sup>1</sup>H} NMR (101 MHz, DMSO-*d*<sub>6</sub>) of 3-hydroxy-3-(1-phenylethyl)indolin-2-one (P38).

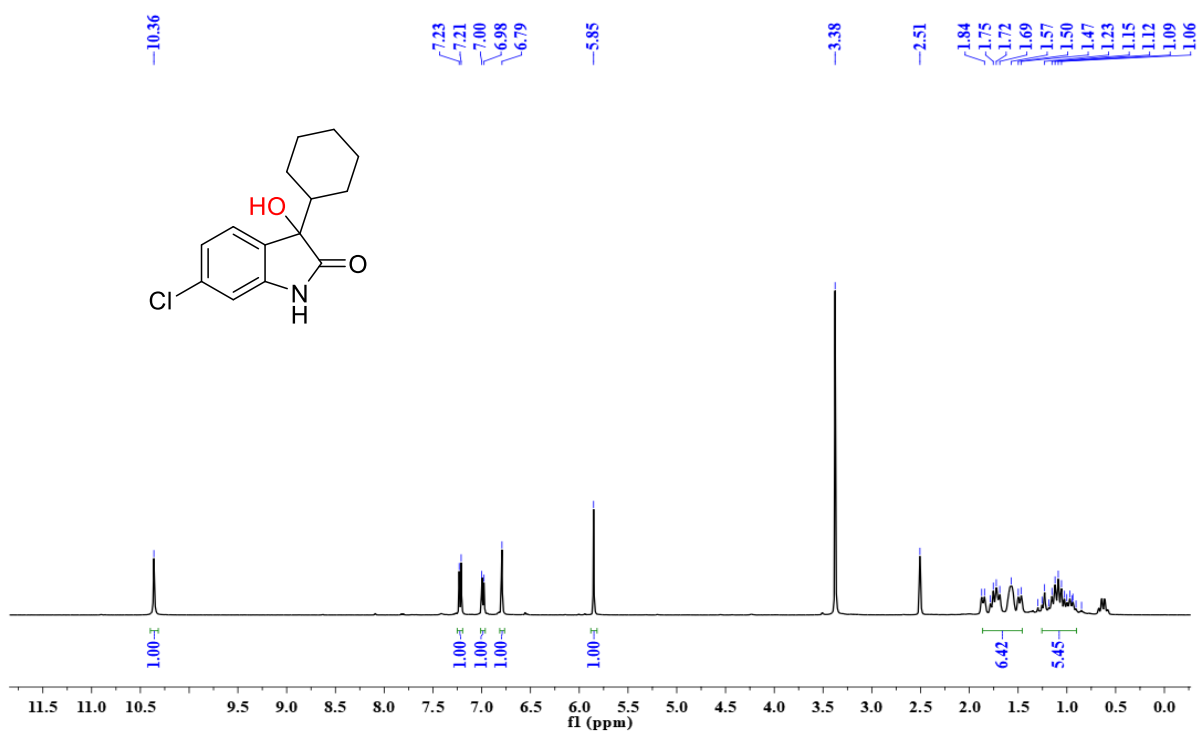

**Figure S81.**  $^1\text{H}$  NMR (400 MHz,  $\text{DMSO-}d_6$ ) of 6-chloro-3-cyclohexyl-3-hydroxyindolin-2-one (P39).

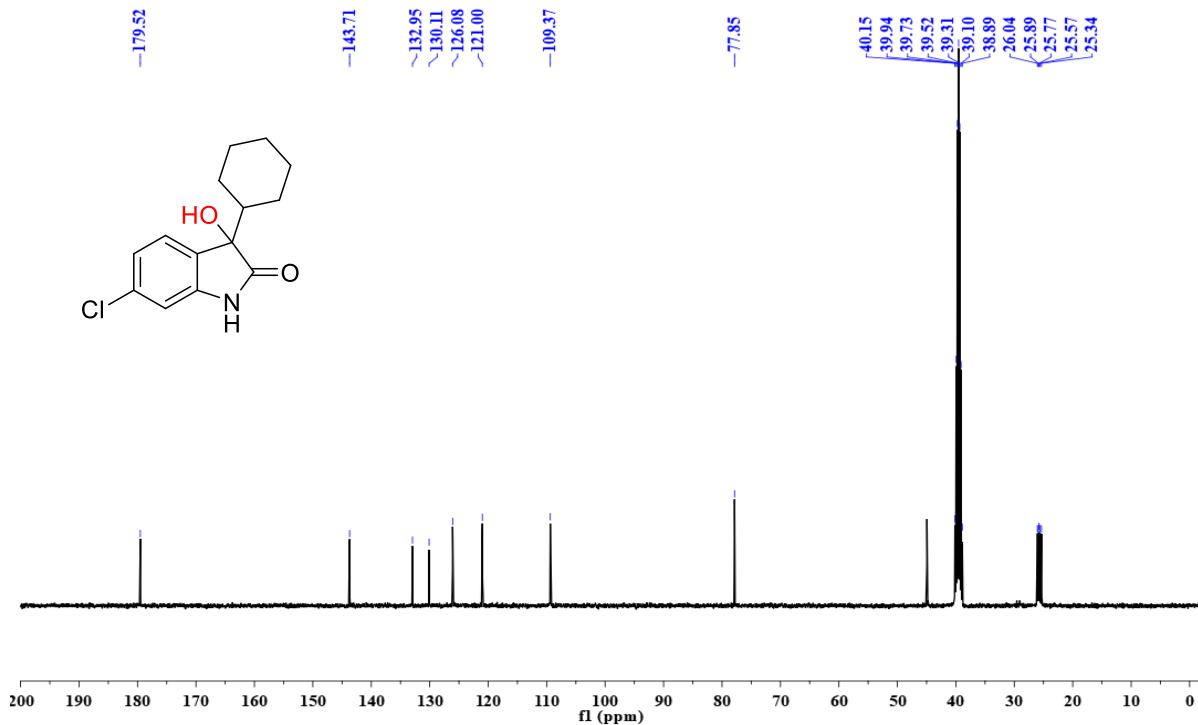

**Figure S82.**  $^{13}\text{C}\{^1\text{H}\}$  NMR (101 MHz,  $\text{DMSO-}d_6$ ) of 6-chloro-3-cyclohexyl-3-hydroxyindolin-2-one (P39).

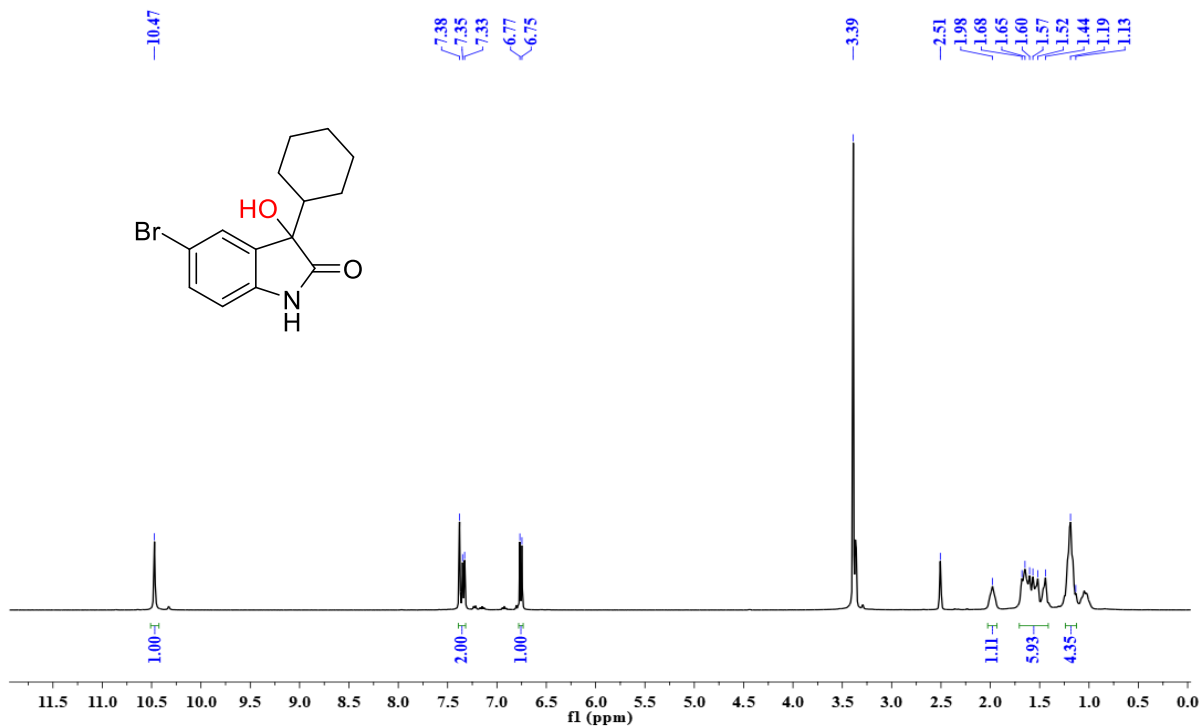

**Figure S83.**  $^1\text{H NMR}$  (400 MHz,  $\text{DMSO-}d_6$ ) of 5-bromo-3-cyclohexyl-3-hydroxyindolin-2-one (**P40**).

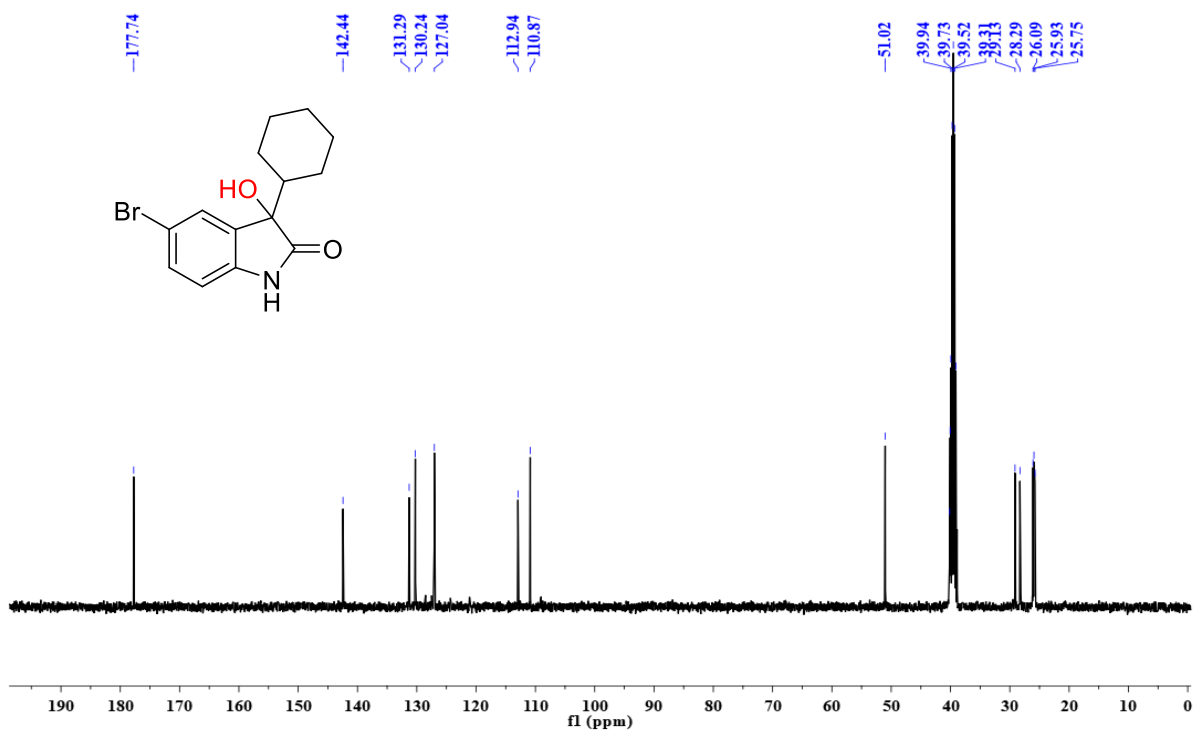

**Figure S84.**  $^{13}\text{C}\{^1\text{H}\}$  NMR (101 MHz,  $\text{DMSO-}d_6$ ) of 5-bromo-3-cyclohexyl-3-hydroxyindolin-2-one (**P40**).



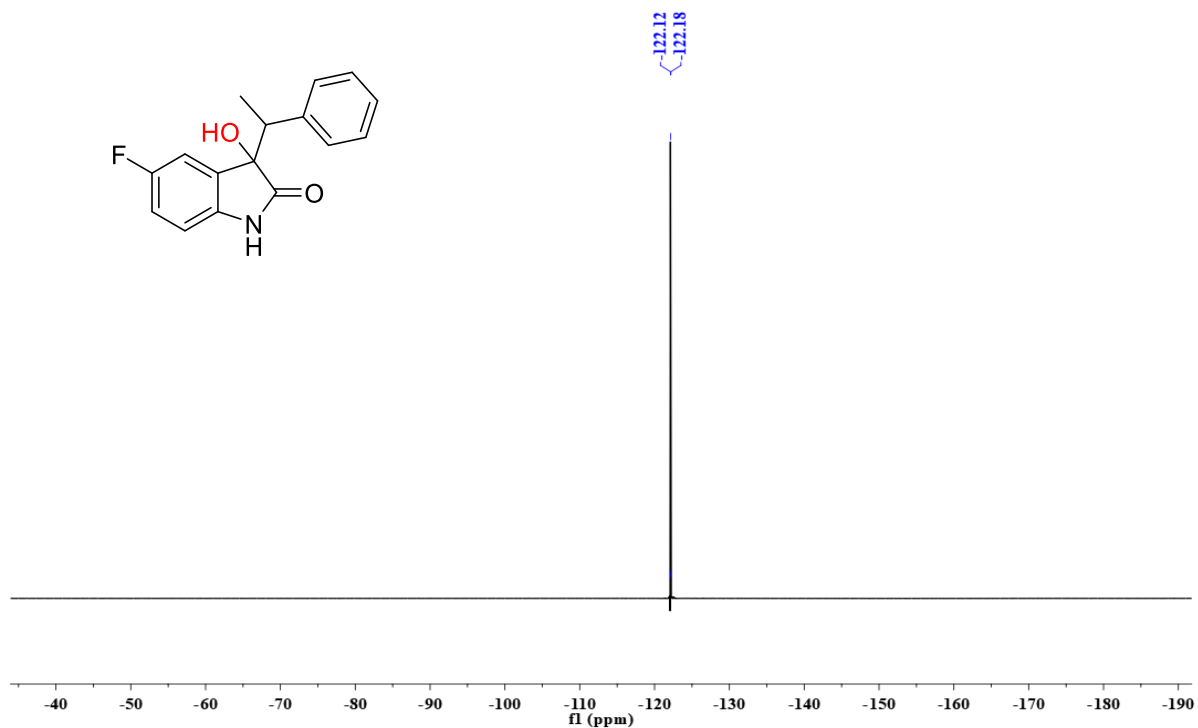

**Figure S87.**  $^{19}\text{F}\{^1\text{H}\}$  NMR (377 MHz,  $\text{DMSO-}d_6$ ) of 5-fluoro-3-hydroxy-3-(1-phenylethyl)indolin-2-one (**P41**).



## Mechanistic studies for C( $\alpha$ )-alkylation of oxindole:

### (a) Catalyst Poisoning test:

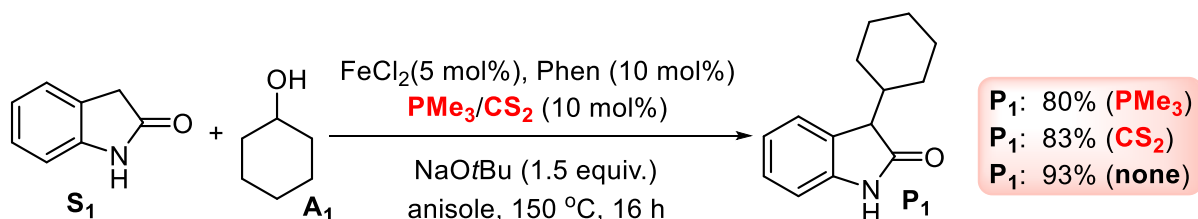

In a dried pressure tube fitted with a magnetic stir bar, a mixture of 2-oxindole (0.040 g, 0.30 mmol), cyclohexanol (0.06 g, 0.6 mmol), FeCl<sub>2</sub> (0.020 g, 5 mol%), 1,10-phenanthroline (0.054 g, 10 mol%), NaOtBu (0.044 g, 0.45 mmol) and anisole (1 mL) was added under a nitrogen atmosphere. To this reaction mixture, PMe<sub>3</sub>/CS<sub>2</sub> (5 mol%) was added. Then the reaction mixture was stirred at 150 °C for 16 h. The reaction mixture was cooled down to room temperature upon completion and concentrated in vacuum. The purification of product was done by column chromatography using hexane/EtOAc as eluent. The isolation of the expected product **P**<sub>1</sub> in good yield suggested the homogeneous behaviour of the catalyst.

**Table S5: Product %yield upon varying of catalyst poisoners:**

| Entry | Catalyst Poisoners (3 mol%) | Yields         |
|-------|-----------------------------|----------------|
| 1     | PMe <sub>3</sub>            | (0.051 g, 80%) |
| 2     | CS <sub>2</sub>             | (0.053 g, 83%) |

### (b) Radical scavenging test:

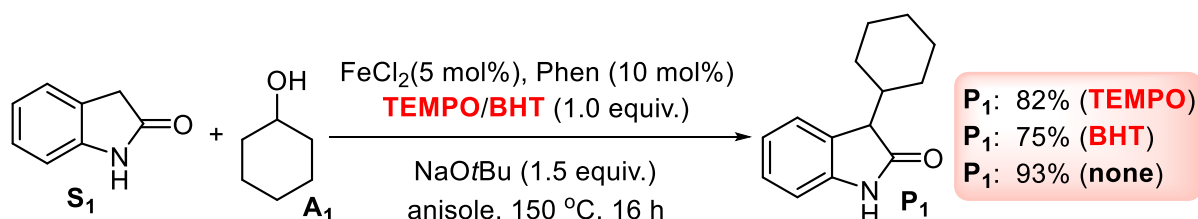

In a dried pressure tube fitted with a magnetic stir bar, a mixture of 2-oxindole (0.040 g, 0.30 mmol), cyclohexanol (0.06 g, 0.6 mmol), FeCl<sub>2</sub> (0.020 g, 5 mol%), 1,10-phenanthroline (0.054 g, 10 mol%), NaOtBu (0.044 g, 0.45 mmol), radical scavenger (1 equiv.) and anisole (1 mL) was added under a nitrogen atmosphere. Then the reaction mixture was stirred at 150 °C for 16 h. The reaction mixture was cooled down to room temperature upon completion and concentrated in vacuum. The purification of product was done by column chromatography using hexane/EtOAc as eluent. The isolation of the expected product in **P**<sub>1</sub> high yields (listed below) suggested a mechanistic path which does not follow radical pathway.

**Table S6: Product %yield upon varying of radical quencher:**

| Entry | Radical Scavenger (1 equiv) | Yields         |
|-------|-----------------------------|----------------|
| 1     | TEMPO                       | (0.052 g, 82%) |
| 2     | BHT                         | (0.048 g, 75%) |

**(c) Dehydrogenation of benzyl alcohol: Dihydrogen detection**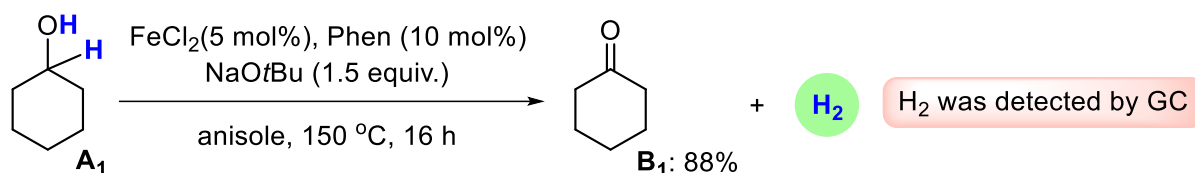

To an oven-dried 10 mL resealable vial, FeCl<sub>2</sub> (0.1 mmol, 1 equiv.), 1,10-phenanthroline (0.4 mmol, 2 equiv.), cyclohexanol (2.0 mmol, 20 equiv.), NaOtBu (4.0 mmol, 4 equivalent), anisole (3 mL) were added inside the glove box. The vial was sealed and the reaction mixture was heated at 150 °C for 16 h. Then, the gaseous phase inside the vial was analysed on GC (TCD detector) which showed the formation of dihydrogen.

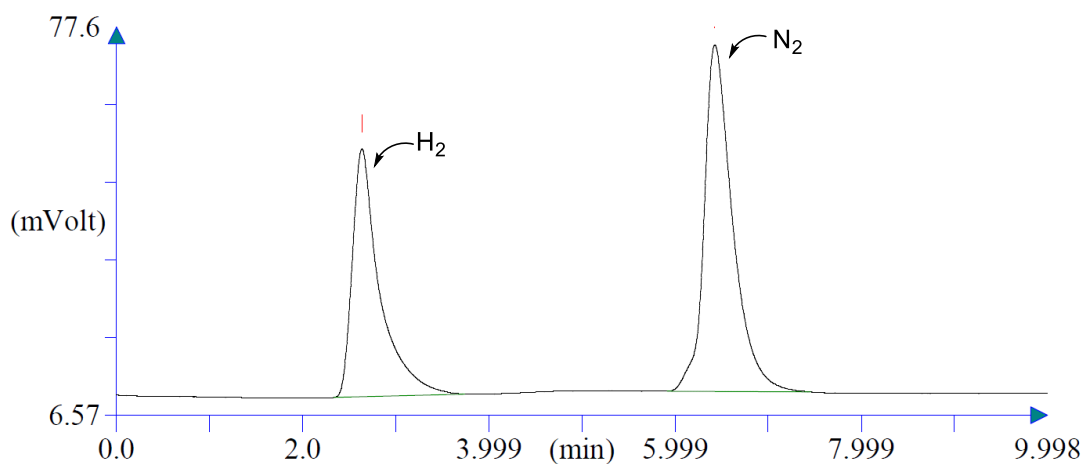

| Peak Number (#) | Retention Time (min) | Area (.1* $\mu$ V*sec) | Area % (%) |
|-----------------|----------------------|------------------------|------------|
| 1               | 2.637                | 9245668                | 40.598     |
| 2               | 6.427                | 13528190               | 59.402     |

22773860

**Figure S88.** GC chromatogram of hydrogen gas evolved in the dehydrogenation of cyclohexanol.

**(d) C=C bond formation by Knoevenagel condensation: Involvement of aldehyde intermediate**

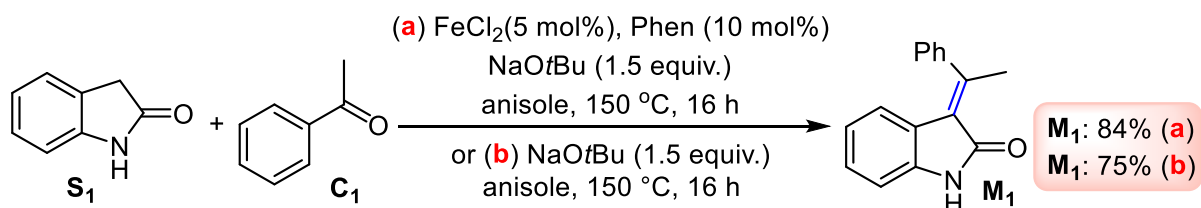

**Procedure A:** In a dried pressure tube fitted with a magnetic stir bar, a mixture of 2-oxindole (0.040 g, 0.30 mmol), acetophenone (0.06 g, 0.6 mmol), FeCl<sub>2</sub> (0.020 g, 5 mol%), 1,10-phenanthroline (0.054 g, 10 mol%), NaOtBu (0.044 g, 0.45 mmol) and anisole (1 mL) was added under a nitrogen atmosphere. Then the reaction mixture was stirred at 150 °C for 16 h. The reaction mixture was cooled down to room temperature upon completion and concentrated in vacuum. The residue was purified by column chromatography using hexane/EtOAc as an eluent to afford pure product 3-(1-phenylethylidene)indolin-2-one (**M**<sub>1</sub>) as a yellow oil (0.059 g, 84%). The desired product **M**<sub>1</sub> was characterized by <sup>1</sup>H and <sup>13</sup>C NMR spectroscopies.

**Procedure B:** In a dried pressure tube fitted with a magnetic stir bar, a mixture of 2-oxindole (0.040 g, 0.30 mmol), acetophenone (0.06 g, 0.6 mmol), NaOtBu (0.044 g, 0.45 mmol) and anisole (1 mL) was added under a nitrogen atmosphere. Then the reaction mixture was stirred at 150 °C for 16 h. The reaction mixture was cooled down to room temperature upon completion and concentrated in vacuum. The residue was purified by column chromatography using hexane/EtOAc as an eluent to afford pure product 3-(1-phenylethylidene)indolin-2-one (**M**<sub>1</sub>) as a yellow oil (0.053 g, 75%). The desired product **M**<sub>1</sub> was characterized by <sup>1</sup>H and <sup>13</sup>C NMR spectroscopies.<sup>4</sup> <sup>1</sup>H NMR (400 MHz, CDCl<sub>3</sub>) δ 8.99 (s, 1H), 7.55 – 7.46 (m, 3H), 7.33 (d, *J* = 6.5 Hz, 2H), 7.10 (t, *J* = 7.6 Hz, 1H), 6.87 (d, *J* = 7.7 Hz, 1H), 6.64 (t, *J* = 7.7 Hz, 1H), 6.17 (d, *J* = 7.8 Hz, 1H), 2.84 (s, 3H). <sup>13</sup>C NMR (101 MHz, CDCl<sub>3</sub>) δ 170.5, 155.6, 143.1, 139.9, 129.3, 128.5, 128.2, 126.6, 124.0, 123.5, 123.2, 121.4, 109.5, 23.0.

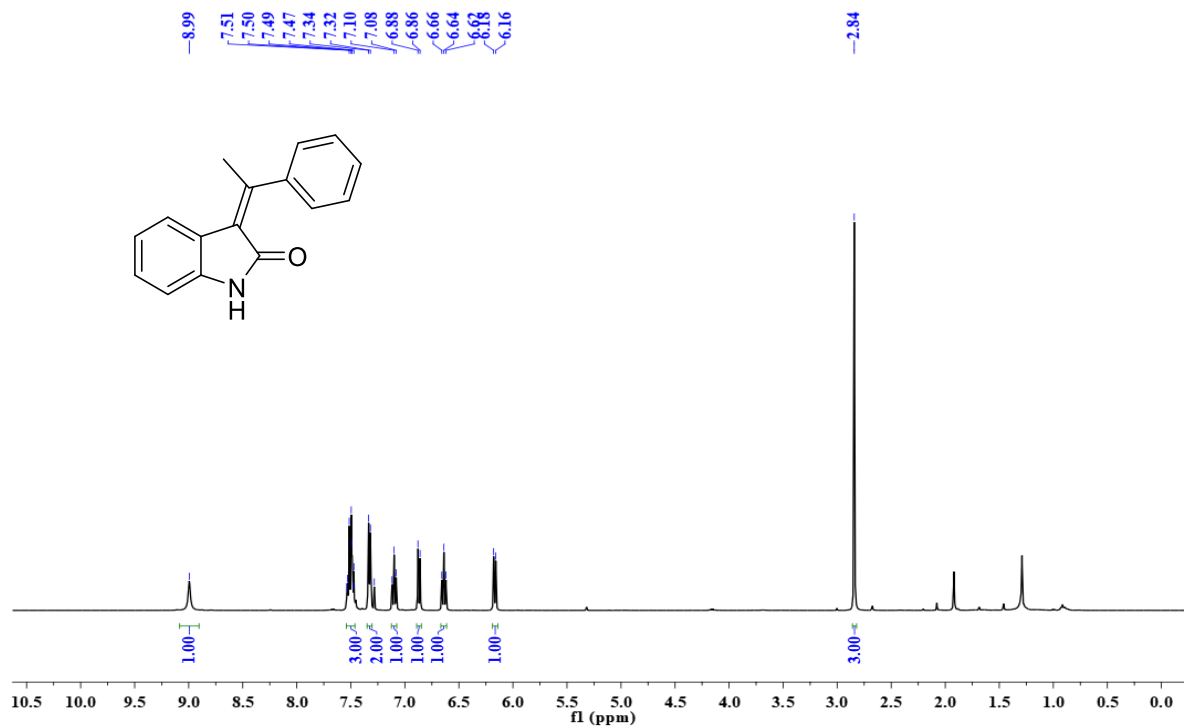

Figure S89. <sup>1</sup>H NMR (400 MHz, CDCl<sub>3</sub>) of 3-(1-phenylethylidene)indolin-2-one (**M1**).

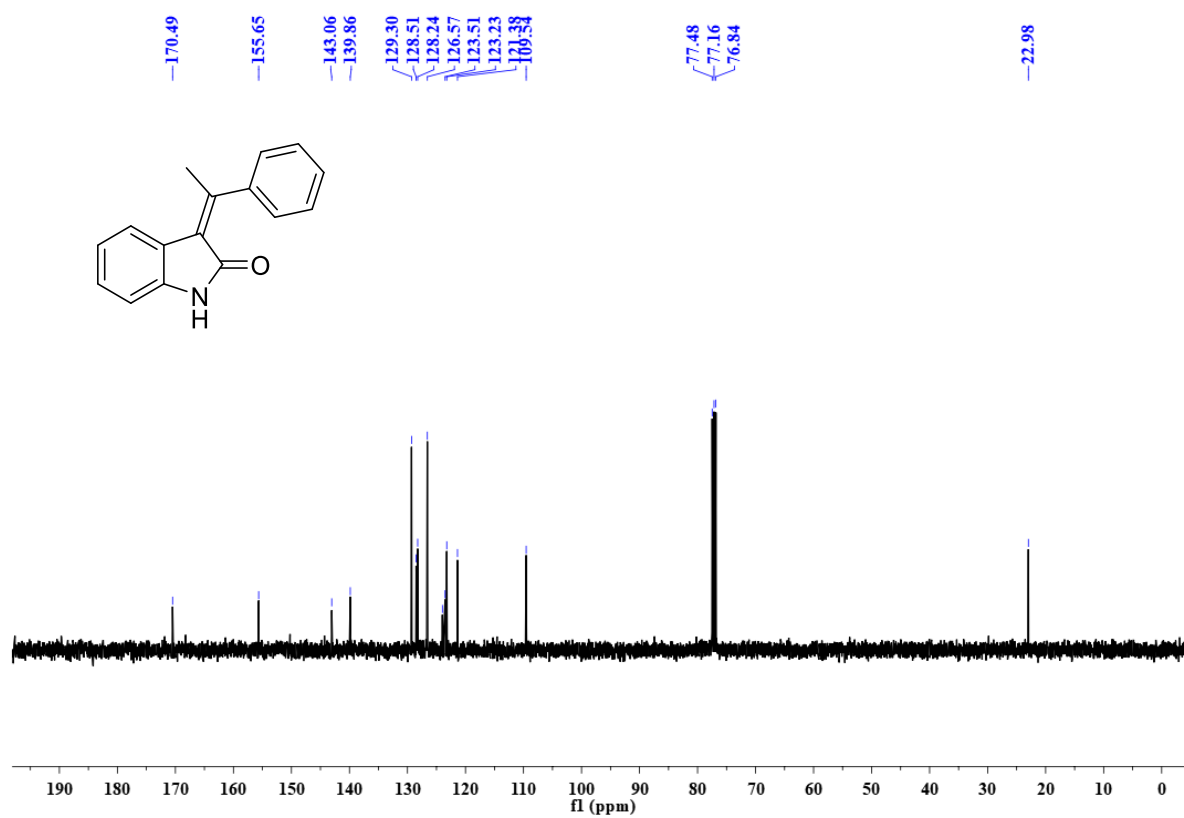

Figure S90. <sup>13</sup>C{<sup>1</sup>H} NMR (101 MHz, CDCl<sub>3</sub>) of 3-(1-phenylethylidene)indolin-2-one (**M1**).

(e) Hydrogenation of  $\alpha,\beta$ -unsaturated compound: Involvement of  $\alpha,\beta$ -unsaturated intermediate

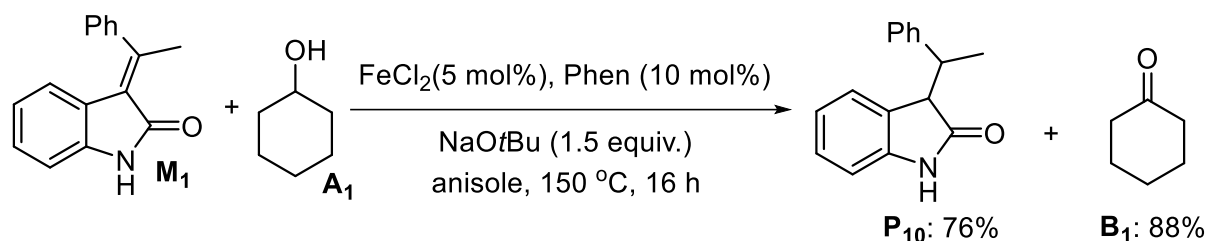

In a dried pressure tube fitted with a magnetic stir bar, a mixture of  $M_1$  (0.07 g, 0.30 mmol), cyclohexanol (0.06 g, 0.6 mmol),  $FeCl_2$  (0.020 g, 5 mol%), 1,10-phenanthroline (0.054 g, 10 mol%), NaOtBu (0.044 g, 0.45 mmol) and anisole (1 mL) was added under a nitrogen atmosphere. Then the reaction mixture was stirred at 150 °C for 16 h. The reaction mixture was cooled down to room temperature upon completion and concentrated in vacuum. The residue was purified by column chromatography using hexane/EtOAc as an eluent to afford pure product  $P_{10}$  as a colourless oil (0.54 g, 76%).

Mechanistic studies for C( $\alpha$ )-alkylation and C-H hydroxylation of oxindole:

(a) One-pot alkylation-hydroxylation of 2-oxindole under inert and aerobic condition:

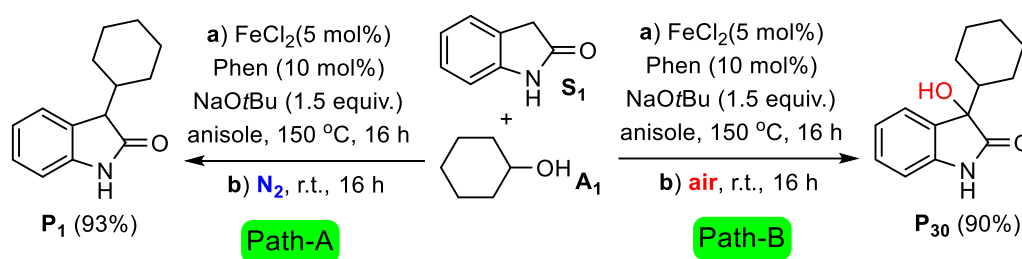

**Path-A:** In a dried pressure tube fitted with a magnetic stir bar, a mixture of 2-oxindole (0.040 g, 0.30 mmol), cyclohexanol (0.06 g, 0.6 mmol),  $FeCl_2$  (0.020 g, 5 mol%), 1,10-phenanthroline (0.054 g, 10 mol%), NaOtBu (0.044 g, 0.45 mmol) and anisole (1 mL) was added under a nitrogen atmosphere. Then the reaction mixture was heated at 150 °C in a preheated oil bath for 16 h. After cooling down to room temperature and the reaction mixture was stirred under nitrogen for 16 h. Finally, concentrated by removing the solvent under vacuum, and the residue was purified by column chromatography with hexane/ethyl acetate (hexane/ethyl acetate = 8.5:1.5) as eluent to give the desired product. The successful isolation of product  $P_1$  in a high yield implies that under the nitrogen atmosphere, there is an absence of any hydroxylated product.

**Path-B:** In a dried pressure tube fitted with a magnetic stir bar, a mixture of 2-oxindole (0.040 g, 0.30 mmol), cyclohexanol (0.06 g, 0.6 mmol), FeCl<sub>2</sub> (0.020 g, 5 mol%), 1,10-phenanthroline (0.054 g, 10 mol%), NaOtBu (0.044 g, 0.45 mmol) and anisole (1 mL) was added under a nitrogen atmosphere. Then the reaction mixture was heated at 150 °C in a preheated oil bath for 16 h. After cooling down to room temperature and the reaction mixture was stirred under nitrogen for 16 h. Finally, concentrated by removing the solvent under vacuum, and the residue was purified by column chromatography with hexane/ethyl acetate (hexane/ethyl acetate = 7:3) as eluent to give the desired product. The successful isolation of the anticipated product **P<sub>30</sub>** in a favorable yield indicates that in the presence of air, hydroxylated products are likely to form.

(b) **Hydroxylation of 3-alkyl-2-oxindole under inert and aerobic condition:**

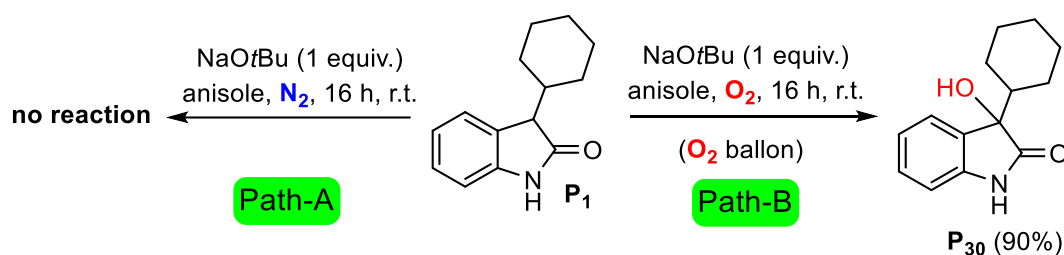

**Path-A:** In a dried pressure tube fitted with a magnetic stir bar, a mixture of 3-cyclohexylindolin-2-one (**P<sub>1</sub>**) (0.043 g, 0.20 mmol), NaOtBu (0.020 g, 0.2 mmol) and anisole (1 mL) was added. Then the reaction mixture was stirred under nitrogen at room temperature for 16 h. Finally, concentrated by removing the solvent under vacuum, and the residue was purified by column chromatography with hexane/ethyl acetate (hexane/ethyl acetate = 8.5:1.5) as eluent to give the desired product. The successful isolation of product **P<sub>1</sub>** in a high yield implies that under the nitrogen atmosphere, there is an absence of any hydroxylated product.

**Path-B:** In a dried pressure tube fitted with a magnetic stir bar, a mixture of 3-cyclohexylindolin-2-one (**P<sub>1</sub>**) (0.043 g, 0.20 mmol), NaOtBu (0.020 g, 0.2 mmol) and anisole (1 mL) was added. Then the reaction mixture was stirred under oxygen (using oxygen balloon) at room temperature for 16 h. Finally, concentrated by removing the solvent under vacuum, and the residue was purified by column chromatography with hexane/ethyl acetate (hexane/ethyl acetate = 7:3) as eluent to give the desired product. The successful isolation of the desired product **P<sub>30</sub>** in a favorable yield indicates that in the presence of oxygen, this is a base catalyzed hydroxylation process.

**(c) Radical scavenging test:**

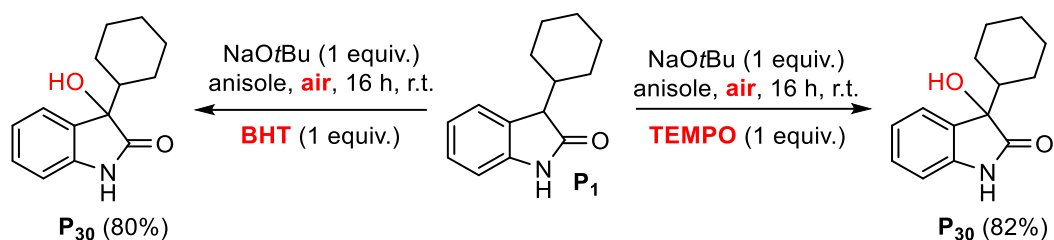

In a dried pressure tube fitted with a magnetic stir bar, a mixture of 3-cyclohexylindolin-2-one (**P1**) (0.043 g, 0.20 mmol), NaOtBu (0.020 g, 0.2 mmol), radical scavenger (1 equiv.) and anisole (1 mL) was added under aerobic condition. Then the reaction mixture was stirred at room temperature for 16 h. Upon completion of the reaction, the reaction mixture was concentrated in vacuum. The purification of product was done by column chromatography using hexane/EtOAc as eluent. The isolation of the expected product in **P30** high yields (listed below) suggested a mechanistic path which does not follow radical pathway.

**Table S7: Product %yield upon varying of radical quencher:**

| Entry | Radical Scavenger (1 equiv) | Yields         |
|-------|-----------------------------|----------------|
| 1     | TEMPO                       | (0.052 g, 82%) |
| 2     | BHT                         | (0.048 g, 80%) |

## X-ray structure determination

Crystallographic data and structure determinations details are compiled in Table S7. The crystals were obtained by slow evaporation of **P5**, **P18** and **P34** in DCM at r.t. The crystals were coated with silicon oil on a glass slide and a suitable single crystal was mounted on a glass fibre. Crystal data were collected with a Rigaku Oxford diffractometer and with an INCOATEC micro source (Cu-K $\alpha$  radiation,  $\lambda = 1.54184 \text{ \AA}$ , multilayer optics) at 100 K and 293 K respectively. The structure was determined using direct methods employed in ShelXT,<sup>5</sup> Olex,<sup>6</sup> and refinement was carried out using least-square minimization implemented in ShelXL.<sup>7</sup> All nonhydrogen atoms were refined with anisotropic displacement parameters. Hydrogen atom positions were fixed geometrically in idealized positions and were refined using a riding model. CCDC 2354252 (for **P5**), CCDC 2354253 (for **P18**) and CCDC 2354254 (for **P34**) contains the supplementary crystallographic data for this paper.

**Table S8.** Crystallographic Data and Refinement Parameters for **P5** and **P63**.

|                                                     | <b>P5</b>                                                   | <b>P18</b>                                                  | <b>P34</b>                                                    |
|-----------------------------------------------------|-------------------------------------------------------------|-------------------------------------------------------------|---------------------------------------------------------------|
| Empirical formula                                   | C <sub>11</sub> H <sub>13</sub> NO                          | C <sub>13</sub> H <sub>14</sub> ClNO                        | C <sub>32</sub> H <sub>30</sub> N <sub>2</sub> O <sub>4</sub> |
| CCDC                                                | 2354252                                                     | 2354253                                                     | 2354254                                                       |
| Formula weight (g mol <sup>-1</sup> )               | 175.22                                                      | 235.70                                                      | 506.58                                                        |
| Temperature                                         | 297.15                                                      | 100.01(10)                                                  | 100.04(10)                                                    |
| Wavelength                                          | 1.54184                                                     | 1.54184                                                     | 1.54184                                                       |
| Crystal system                                      | monoclinic                                                  | monoclinic                                                  | monoclinic                                                    |
| Space group                                         | <i>I</i> 2/ <i>a</i>                                        | <i>P</i> 2 <sub>1</sub> / <i>n</i>                          | <i>I</i> <i>a</i>                                             |
| <i>a</i> (Å)                                        | 21.3851(7)                                                  | 10.9223(2)                                                  | 7.2634(2)                                                     |
| <i>b</i> (Å)                                        | 5.29270(10)                                                 | 5.97560(10)                                                 | 24.2647(7)                                                    |
| <i>c</i> (Å)                                        | 18.3278(6)                                                  | 18.2274(4)                                                  | 14.6681(4)                                                    |
| $\alpha$ (deg)                                      | 90                                                          | 90                                                          | 90                                                            |
| $\beta$ (deg)                                       | 111.340(4)                                                  | 103.405(2)                                                  | 95.182(2)                                                     |
| $\gamma$ (deg)                                      | 90                                                          | 90                                                          | 90                                                            |
| volume (Å <sup>3</sup> )                            | 1932.20(11)                                                 | 1157.24(4)                                                  | 2574.60(12)                                                   |
| <i>Z</i>                                            | 8                                                           | 4                                                           | 4                                                             |
| $\rho_{\text{calc}}$ (g/cm <sup>3</sup> )           | 1.205                                                       | 1.353                                                       | 1.307                                                         |
| $\mu$ (mm <sup>-1</sup> )                           | 0.610                                                       | 2.729                                                       | 0.693                                                         |
| <i>F</i> (000)                                      | 752.0                                                       | 496.0                                                       | 1072.0                                                        |
| Crystal Size                                        | 0.2 × 0.2 × 0.1 mm <sup>3</sup>                             | 0.2 × 0.2 × 0.1 mm <sup>3</sup>                             | 0.2 × 0.2 × 0.1 mm <sup>3</sup>                               |
| 2 $\theta$ Range (deg)                              | 8.878 - 150.942                                             | 8.654 - 150.748                                             | 7.064 - 156.516                                               |
| Index Ranges                                        | -26 ≤ <i>h</i> ≤ 26, -6 ≤ <i>k</i> ≤ 6, -23 ≤ <i>l</i> ≤ 22 | -13 ≤ <i>h</i> ≤ 13, -7 ≤ <i>k</i> ≤ 6, -22 ≤ <i>l</i> ≤ 22 | -9 ≤ <i>h</i> ≤ 4, -25 ≤ <i>k</i> ≤ 30, -18 ≤ <i>l</i> ≤ 18   |
| Reflections collected                               | 10008                                                       | 9232                                                        | 10691                                                         |
| Independent reflections ( <i>R</i> <sub>int</sub> ) | 1973(0.0364)                                                | 2344 (0.0465)                                               | 3351 (0.0592)                                                 |
| Completeness to theta = 25.07 <sup>o</sup>          | 99.7                                                        | 99.9                                                        | 99.96                                                         |
| Refinement method                                   | Full-matrix least-squares on <i>F</i> <sup>2</sup>          | Full-matrix least-squares on <i>F</i> <sup>2</sup>          | Full-matrix least-squares on <i>F</i> <sup>2</sup>            |



|                                                  |                                  |                                  |                                  |
|--------------------------------------------------|----------------------------------|----------------------------------|----------------------------------|
| Data/Restrains/parameters                        | 1973/0/120                       | 2344/0/145                       | 3351/2/347                       |
| Goodness-of-fit on $F^2$                         | 1.055                            | 1.068                            | 1.074                            |
| Final $R$ indices [ $I > 2\sigma(I)$ ]           | $R_1 = 0.0403$ , $wR_2 = 0.1097$ | $R_1 = 0.0364$ , $wR_2 = 0.0998$ | $R_1 = 0.0436$ , $wR_2 = 0.1102$ |
| $R$ indices (all data)                           | $R_1 = 0.0473$ , $wR_2 = 0.1157$ | $R_1 = 0.0386$ , $wR_2 = 0.1017$ | $R_1 = 0.0485$ , $wR_2 = 0.1155$ |
| Largest diff. peak/hole ( $e \text{ \AA}^{-3}$ ) | 0.12/-0.21                       | 0.46/-0.37                       | 0.22/-0.21                       |

**Figure S91.** Molecular Structure of complex **P<sub>5</sub>** showing 50% Ellipsoids

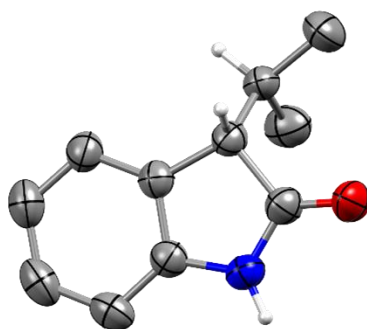

**Figure S92.** Molecular Structure of complex **P<sub>18</sub>** showing 50% Ellipsoids

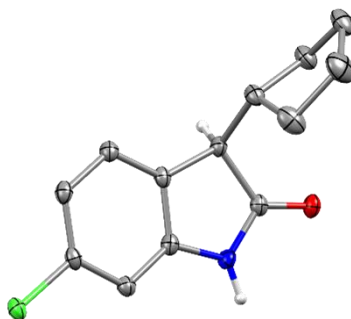

**Figure S93.** Molecular Structure of complex **P<sub>34</sub>** showing 50% Ellipsoids

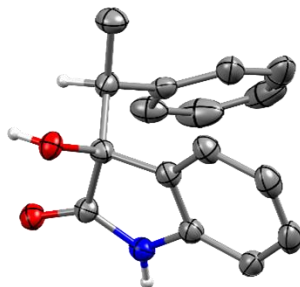

**Table S9. Method A (anisole, [Fe] 5 mol%, 1,10-Phen 10 mol%, NaOtBu 1.5 eq, 150 °C, 16 h): Zero Pass CHEM21 green metrics toolkit**

| Supplementary Information: Appendix 2                                                                   |             |               |                        | Summary of Zero Pass Metrics Toolkit |             |                                                           |             |                  |                           |                               |             |                  |             |                |                             |                               |              |  |
|---------------------------------------------------------------------------------------------------------|-------------|---------------|------------------------|--------------------------------------|-------------|-----------------------------------------------------------|-------------|------------------|---------------------------|-------------------------------|-------------|------------------|-------------|----------------|-----------------------------|-------------------------------|--------------|--|
| Yield, conversion, selectivity, AE, RME                                                                 |             |               |                        |                                      |             |                                                           |             |                  |                           |                               |             |                  |             |                |                             |                               |              |  |
| Reactant (Limiting Reactant First)                                                                      | Mass (g)    | MW            | Mol                    | Catalyst                             | Mass (g)    | Reagent                                                   | Mass (g)    | Reaction solvent | Volume (cm <sup>3</sup> ) | Density (g ml <sup>-1</sup> ) | Mass (g)    | Work up chemical | Mass (g)    | Workup solvent | Volume (cm <sup>3</sup> )   | Density (g ml <sup>-1</sup> ) | Mass (g)     |  |
| 2-oxindole                                                                                              | 1.33        | 133.15        | 0.01                   | FeCl <sub>2</sub>                    | 0.06        |                                                           |             | anisole          | 10.00                     | 1.00                          | 9.95        |                  |             | Ethyl acetate  | 25.00                       | 0.90                          | 22.55        |  |
| Cyclohexanol                                                                                            | 2.00        | 100.15        | 0.02                   | 1,10-Phen                            | 0.18        |                                                           |             |                  |                           |                               |             |                  |             |                |                             |                               |              |  |
| NaOtBu                                                                                                  | 1.41        | 96.10         | 0.01                   |                                      |             |                                                           |             |                  |                           |                               | 0.00        |                  |             |                |                             |                               | 0.00         |  |
| <b>Total</b>                                                                                            | <b>4.74</b> | <b>329.40</b> |                        |                                      | <b>0.24</b> |                                                           | <b>0.00</b> |                  |                           |                               | <b>9.95</b> |                  | <b>0.00</b> |                |                             |                               | <b>22.55</b> |  |
|                                                                                                         |             |               |                        |                                      |             | <b>Flag</b>                                               |             |                  |                           |                               |             |                  |             |                |                             |                               |              |  |
| $AE = \frac{\text{molecular weight of product}}{\text{total molecular weight of reactants}} \times 100$ |             |               |                        |                                      |             | Yield                                                     | 90.0        | ●                | 90.0                      |                               |             |                  |             |                |                             |                               |              |  |
|                                                                                                         |             |               |                        |                                      |             | Conversion                                                | 100.0       | ●                | 100.0                     |                               |             |                  |             |                |                             |                               |              |  |
|                                                                                                         |             |               |                        |                                      |             | Selectivity                                               | 90.0        | ●                | 90.0                      |                               |             |                  |             |                |                             |                               |              |  |
| $RME = \frac{\text{mass of isolated product}}{\text{total mass of reactants}} \times 100$               |             |               |                        |                                      |             | AE                                                        | 65.4        |                  |                           |                               |             |                  | mass        | mw             | mol                         |                               |              |  |
|                                                                                                         |             |               |                        |                                      |             | RME                                                       | 40.8        |                  |                           |                               |             |                  | Product     | 1.937          | 215.296                     | 0.0089969                     |              |  |
|                                                                                                         |             |               |                        |                                      |             |                                                           |             |                  |                           |                               |             |                  |             |                | mass                        |                               |              |  |
|                                                                                                         |             |               |                        |                                      |             |                                                           |             |                  |                           |                               |             |                  |             |                | Unreacted limiting reactant | 0.000                         |              |  |
| <b>Solvents (Zero Pass)</b>                                                                             |             |               |                        |                                      |             |                                                           |             |                  |                           |                               |             |                  |             |                |                             |                               |              |  |
| <b>Highly hazardous solvents (Red flag for any of the following)</b>                                    |             |               |                        |                                      |             | <b>List Highly Hazardous Solvents Below</b>               |             |                  |                           |                               |             |                  |             |                |                             |                               |              |  |
| Et <sub>2</sub> O, Benzene, CCl <sub>4</sub> , chloroform, DCE, nitromethane, CS <sub>2</sub> , HMPA    |             |               |                        |                                      |             | None                                                      |             |                  |                           |                               |             |                  |             |                |                             |                               |              |  |
| <b>Health and Safety (Zero Pass)</b>                                                                    |             |               |                        |                                      |             |                                                           |             |                  |                           |                               |             |                  |             |                |                             |                               |              |  |
| <b>Health &amp; safety (Red flag for any of the following)</b>                                          |             |               |                        |                                      |             | <b>List substances plus the red flagged H-codes below</b> |             |                  |                           |                               |             |                  |             |                |                             |                               |              |  |
| Highly explosive                                                                                        |             |               | H200, H201, H202, H203 |                                      |             | None                                                      |             |                  |                           |                               |             |                  |             |                |                             |                               |              |  |
| Explosive thermal runaway                                                                               |             |               | H240                   |                                      |             | None                                                      |             |                  |                           |                               |             |                  |             |                |                             |                               |              |  |
| Fatally toxic                                                                                           |             |               | H300, H310, H330       |                                      |             | None                                                      |             |                  |                           |                               |             |                  |             |                |                             |                               |              |  |
| Mutagenic                                                                                               |             |               | H350                   |                                      |             | None                                                      |             |                  |                           |                               |             |                  |             |                |                             |                               |              |  |
| Repro-toxic                                                                                             |             |               | H360                   |                                      |             | None                                                      |             |                  |                           |                               |             |                  |             |                |                             |                               |              |  |
| Serious environmental implications                                                                      |             |               | H420                   |                                      |             | None                                                      |             |                  |                           |                               |             |                  |             |                |                             |                               |              |  |





**Table S12. Method D (anisole,[Fe] 5 mol%, 1,10-Phen 10 mol%, NaOtBu 1.5 eq, 150 °C, 32 h): Zero Pass CHEM21 green metrics toolkit**

| Supplementary Information: Appendix 2                                                                   |             |               |      | Summary of Zero Pass Metrics Toolkit |             |             |             |                                                           |                           |                               |             |                             |             |                |                           |                               |              |  |
|---------------------------------------------------------------------------------------------------------|-------------|---------------|------|--------------------------------------|-------------|-------------|-------------|-----------------------------------------------------------|---------------------------|-------------------------------|-------------|-----------------------------|-------------|----------------|---------------------------|-------------------------------|--------------|--|
| Yield, conversion, selectivity, AE, RME                                                                 |             |               |      |                                      |             |             |             |                                                           |                           |                               |             |                             |             |                |                           |                               |              |  |
| Reactant (Limiting Reactant First)                                                                      | Mass (g)    | MW            | Mol  | Catalyst                             | Mass (g)    | Reagent     | Mass (g)    | Reaction solvent                                          | Volume (cm <sup>3</sup> ) | Density (g ml <sup>-1</sup> ) | Mass (g)    | Work up chemical            | Mass (g)    | Workup solvent | Volume (cm <sup>3</sup> ) | Density (g ml <sup>-1</sup> ) | Mass (g)     |  |
| 2-oxindole                                                                                              | 1.33        | 133.15        | 0.01 | FeCl <sub>2</sub>                    | 0.06        |             |             | anisole                                                   | 10.00                     | 1.00                          | 9.95        |                             |             | Ethyl acetate  | 25.00                     | 0.90                          | 22.55        |  |
| Cyclohexanol                                                                                            | 2.00        | 100.15        | 0.02 | 1,10-Phen                            | 0.18        |             |             |                                                           |                           |                               |             |                             |             |                |                           |                               |              |  |
| NaOtBu                                                                                                  | 1.41        | 96.10         | 0.01 |                                      |             |             |             |                                                           |                           |                               | 0.00        |                             |             |                |                           |                               | 0.00         |  |
| Oxygen                                                                                                  | 0.16        | 32.00         | 0.01 |                                      |             |             |             |                                                           |                           |                               | 0.00        |                             |             |                |                           |                               | 0.00         |  |
| <b>Total</b>                                                                                            | <b>4.90</b> | <b>361.40</b> |      |                                      | <b>0.24</b> |             | <b>0.00</b> |                                                           |                           |                               | <b>9.95</b> |                             | <b>0.00</b> |                |                           |                               | <b>22.55</b> |  |
|                                                                                                         |             |               |      |                                      |             | <b>Flag</b> |             |                                                           |                           |                               |             |                             |             |                |                           |                               |              |  |
| $AE = \frac{\text{molecular weight of product}}{\text{total molecular weight of reactants}} \times 100$ |             |               |      |                                      |             | Yield       | 90.0        | 90.0                                                      |                           |                               |             |                             |             |                |                           |                               |              |  |
|                                                                                                         |             |               |      |                                      |             | Conversion  | 100.0       | 100.0                                                     |                           |                               |             |                             |             |                |                           |                               |              |  |
|                                                                                                         |             |               |      |                                      |             | Selectivity | 90.0        | 90.0                                                      |                           |                               |             |                             |             |                |                           |                               |              |  |
| $RME = \frac{\text{mass of isolated product}}{\text{total mass of reactants}} \times 100$               |             |               |      |                                      |             | AE          | 64.0        |                                                           |                           |                               |             |                             |             |                |                           |                               |              |  |
|                                                                                                         |             |               |      |                                      |             | RME         | 42.4        |                                                           |                           |                               |             |                             |             |                |                           |                               |              |  |
| <b>Solvents (Zero Pass)</b>                                                                             |             |               |      |                                      |             |             |             |                                                           |                           |                               |             |                             |             |                |                           |                               |              |  |
| <b>Highly hazardous solvents (Red flag for any of the following)</b>                                    |             |               |      |                                      |             |             |             | <b>List Highly Hazardous Solvents Below</b>               |                           |                               |             |                             |             |                |                           |                               |              |  |
| Et <sub>2</sub> O, Benzene, CCl <sub>4</sub> , chloroform, DCE, nitromethane, CS <sub>2</sub> , HMPA    |             |               |      |                                      |             |             |             | None                                                      |                           |                               |             |                             |             |                |                           |                               |              |  |
| <b>Health and Safety (Zero Pass)</b>                                                                    |             |               |      |                                      |             |             |             |                                                           |                           |                               |             |                             |             |                |                           |                               |              |  |
| <b>Health &amp; safety (Red flag for any of the following)</b>                                          |             |               |      |                                      |             |             |             | <b>List substances plus the red flagged H-codes below</b> |                           |                               |             |                             |             |                |                           |                               |              |  |
| Highly explosive                                                                                        |             |               |      | H200, H201, H202, H203               |             |             |             | None                                                      |                           |                               |             |                             |             |                |                           |                               |              |  |
| Explosive thermal runaway                                                                               |             |               |      | H240                                 |             |             |             | None                                                      |                           |                               |             |                             |             |                |                           |                               |              |  |
| Fatally toxic                                                                                           |             |               |      | H300, H310, H330                     |             |             |             | None                                                      |                           |                               |             |                             |             |                |                           |                               |              |  |
| Mutagenic                                                                                               |             |               |      | H350                                 |             |             |             | None                                                      |                           |                               |             |                             |             |                |                           |                               |              |  |
| Repro-toxic                                                                                             |             |               |      | H360                                 |             |             |             | None                                                      |                           |                               |             |                             |             |                |                           |                               |              |  |
| Serious environmental implications                                                                      |             |               |      | H420                                 |             |             |             | None                                                      |                           |                               |             |                             |             |                |                           |                               |              |  |
|                                                                                                         |             |               |      |                                      |             |             |             |                                                           |                           |                               |             | Product                     | mass        | mw             | mol                       |                               |              |  |
|                                                                                                         |             |               |      |                                      |             |             |             |                                                           |                           |                               |             |                             | 2.081       | 231.295        | 0.0089972                 |                               |              |  |
|                                                                                                         |             |               |      |                                      |             |             |             |                                                           |                           |                               |             | Unreacted limiting reactant | mass        |                |                           |                               |              |  |
|                                                                                                         |             |               |      |                                      |             |             |             |                                                           |                           |                               |             |                             | 0.000       |                |                           |                               |              |  |



| Supply remaining | Flag colour | Note element |
|------------------|-------------|--------------|
| 5-50 years       | Red Flag    |              |
| 50-500 years     | Amber Flag  |              |
| +500 years       | Green Flag  | Fe           |

| Remaining years until depletion of known reserves (based on current rate of extraction)                                                                                                                                                                                                                                          |             |          |          |          |          |          |          |          |          |          |          |          |          |          |          |          |          |          |
|----------------------------------------------------------------------------------------------------------------------------------------------------------------------------------------------------------------------------------------------------------------------------------------------------------------------------------|-------------|----------|----------|----------|----------|----------|----------|----------|----------|----------|----------|----------|----------|----------|----------|----------|----------|----------|
| <div style="display: flex; justify-content: space-around;"> <div style="background-color: red; color: white; padding: 2px;">5-50 years</div> <div style="background-color: orange; color: white; padding: 2px;">50-100 years</div> <div style="background-color: yellow; color: black; padding: 2px;">100-500 years</div> </div> |             |          |          |          |          |          |          |          |          |          |          |          |          |          |          |          |          |          |
| 1                                                                                                                                                                                                                                                                                                                                | 2           | 3        | 4        | 5        | 6        | 7        | 8        | 9        | 10       | 11       | 12       | 13       | 14       | 15       | 16       | 17       | 18       | 19       |
| H                                                                                                                                                                                                                                                                                                                                | Li          | Be       | B        | C        | N        | O        | F        | Ne       | Na       | Mg       | Al       | Si       | P        | S        | Cl       | Ar       | K        | Ca       |
| 19                                                                                                                                                                                                                                                                                                                               | 20          | 21       | 22       | 23       | 24       | 25       | 26       | 27       | 28       | 29       | 30       | 31       | 32       | 33       | 34       | 35       | 36       | 37       |
| K                                                                                                                                                                                                                                                                                                                                | Ca          | Sc       | Ti       | V        | Cr       | Mn       | Fe       | Co       | Ni       | Cu       | Zn       | Ga       | Ge       | As       | Se       | Br       | Kr       | Rb       |
| 37                                                                                                                                                                                                                                                                                                                               | 38          | 39       | 40       | 41       | 42       | 43       | 44       | 45       | 46       | 47       | 48       | 49       | 50       | 51       | 52       | 53       | 54       | 55       |
| Rb                                                                                                                                                                                                                                                                                                                               | Sr          | Y        | Zr       | Nb       | Mo       | Tc       | Ru       | Rh       | Pd       | Ag       | Cd       | In       | Sn       | Sb       | Te       | I        | Xe       | Cs       |
| 55                                                                                                                                                                                                                                                                                                                               | 56          | 57       | 58       | 59       | 60       | 61       | 62       | 63       | 64       | 65       | 66       | 67       | 68       | 69       | 70       | 71       | 72       | 73       |
| Cs                                                                                                                                                                                                                                                                                                                               | Ba          | La*      | Hf       | Ta       | W        | Re       | Os       | Ir       | Pt       | Au       | Hg       | Tl       | Pb       | Bi       | Po       | At       | Rn       | Fr       |
| 73                                                                                                                                                                                                                                                                                                                               | 74          | 75       | 76       | 77       | 78       | 79       | 80       | 81       | 82       | 83       | 84       | 85       | 86       | 87       | 88       | 89       | 90       | 91       |
| Fr                                                                                                                                                                                                                                                                                                                               | Ra          | Ac ‡     | Rf       | Db       | Sg       | Bh       | Hs       | Mt       | Ds       | Rg       | Uub      | Uut      | Uuq      | Uup      | Lv       | Uus      | Uuo      |          |
| 91                                                                                                                                                                                                                                                                                                                               | 92          | 93       | 94       | 95       | 96       | 97       | 98       | 99       | 100      | 101      | 102      | 103      | 104      | 105      | 106      | 107      | 108      | 109      |
| Lanthanides*                                                                                                                                                                                                                                                                                                                     |             |          |          |          |          |          |          |          |          |          |          |          |          |          |          |          |          |          |
|                                                                                                                                                                                                                                                                                                                                  | Ce          | Pr       | Nd       | Pm       | Sm       | Eu       | Gd       | Tb       | Dy       | Ho       | Er       | Tm       | Yb       | Lu       |          |          |          |          |
|                                                                                                                                                                                                                                                                                                                                  | 58          | 59       | 60       | 61       | 62       | 63       | 64       | 65       | 66       | 67       | 68       | 69       | 70       | 71       |          |          |          |          |
|                                                                                                                                                                                                                                                                                                                                  | 140.9077    | 140.9144 | 140.9078 | 140.9176 | 150.358  | 151.964  | 157.25   | 158.9078 | 158.9052 | 162.50   | 160.9304 | 160.9304 | 162.50   | 174.967  | 175.047  | 174.967  | 175.047  | 174.967  |
|                                                                                                                                                                                                                                                                                                                                  | 92          | 93       | 94       | 95       | 96       | 97       | 98       | 99       | 100      | 101      | 102      | 103      | 104      | 105      | 106      | 107      | 108      | 109      |
|                                                                                                                                                                                                                                                                                                                                  | Actinides ‡ |          |          |          |          |          |          |          |          |          |          |          |          |          |          |          |          |          |
|                                                                                                                                                                                                                                                                                                                                  | Th          | Pa       | U        | Np       | Pu       | Am       | Cm       | Bk       | Cf       | Es       | Fm       | Md       | No       | Lr       |          |          |          |          |
|                                                                                                                                                                                                                                                                                                                                  | 90          | 91       | 92       | 93       | 94       | 95       | 96       | 97       | 98       | 99       | 100      | 101      | 102      | 103      | 104      | 105      | 106      | 107      |
|                                                                                                                                                                                                                                                                                                                                  | 232.0377    | 231.0369 | 238.0289 | 237.0481 | 244.0642 | 244.0642 | 247.0713 | 247.0713 | 261.1088 | 261.1088 | 265.1088 | 269.1088 | 269.1088 | 289.1088 | 289.1088 | 289.1088 | 289.1088 | 289.1088 |

| Energy (First Pass)                          | Tick         |
|----------------------------------------------|--------------|
| Reaction run between 0 to 70°C               | Green Flag   |
| Reaction run between -20 to 0 or 70 to 140°C | Amber Flag X |
| Reaction run below -20 or above 140°C        | Red Flag     |

| Reaction run at reflux                                   | Red Flag   | Tick |
|----------------------------------------------------------|------------|------|
| Reaction run 5°C or more below the solvent boiling point | Green Flag | X    |

| Batch/flow | Tick         |
|------------|--------------|
| Flow       | Green Flag   |
| Batch      | Amber Flag X |

| Work Up                                                                        | List           |
|--------------------------------------------------------------------------------|----------------|
| quenching                                                                      |                |
| filtration                                                                     |                |
| centrifugation                                                                 |                |
| crystallisation                                                                | Green Flag     |
| Low temperature distillation/evaporation/sublimation (< 140 °C at atmospheric) |                |
| solvent exchange, quenching into aqueous solvent                               | Amber Flag     |
| chromatography/ion exchange                                                    | Red Flag       |
| high temperature                                                               | Chromatography |
| multiple recrystallisation                                                     |                |

| Health & safety            | Red Flag                     | Amber Flag                   | Green Flag                                                 | List substances and H-codes | List substances and H-codes      | List substances and H-codes                                                                                                                                                                                                         |
|----------------------------|------------------------------|------------------------------|------------------------------------------------------------|-----------------------------|----------------------------------|-------------------------------------------------------------------------------------------------------------------------------------------------------------------------------------------------------------------------------------|
| Highly explosive           | H200, H201, H202, H203       | H205, H220, H224             | If no red or amber flagged H codes present then green flag | 1,10-Phenanthroline: H410   | Cyclohexanol: H412; NaOtBu: H351 | 2-oxindole: H302, H312, H332,; Cyclohexanol: H302, H312, H315; H332, H319, H335 NaOtBu: H225, H251, H314, H335, H336, Ethylacetate: H225, H319, H336. Anisole: H226, H336; FeCl2: H290, H302, H315, H318; 1,10-Phenanthroline: H301 |
| Explosive thermal runaway  | H230, H240, H250             | H241                         |                                                            |                             |                                  |                                                                                                                                                                                                                                     |
| Toxic                      | H300, H310, H330             | H301, H311, H331,            |                                                            |                             |                                  |                                                                                                                                                                                                                                     |
| Long Term toxicity         | H340, H350, H360, H370, H372 | H341, H351, H361, H371, H373 |                                                            |                             |                                  |                                                                                                                                                                                                                                     |
| Environmental implications | H400, H410, H411, H420       | H401, H412                   |                                                            |                             |                                  |                                                                                                                                                                                                                                     |

| Use of chemicals of environmental concern                                            | Red Flag | List substances of very high concern |
|--------------------------------------------------------------------------------------|----------|--------------------------------------|
| Chemical identified as Substances of Very High Concern by ChemSec which are utilised | Red Flag | None                                 |

**Table S14. Method B (neat, [Fe] 5 mol%, 1,10-Phen 10 mol%, NaOtBu 1.5 eq, 150 °C, 8 h): First Pass CHEM21 green metrics toolkit**

| Supplementary Information: Appendix 2                                                      |             |                                                                                                                                                                                         | Summary of First Pass Metrics Toolkit |                   |             |         |                                    |                  |                           |                                   |             |                             |             |                |                           |                               |              |  |
|--------------------------------------------------------------------------------------------|-------------|-----------------------------------------------------------------------------------------------------------------------------------------------------------------------------------------|---------------------------------------|-------------------|-------------|---------|------------------------------------|------------------|---------------------------|-----------------------------------|-------------|-----------------------------|-------------|----------------|---------------------------|-------------------------------|--------------|--|
| Yield, AE, RME, MI/PMI and OE                                                              |             |                                                                                                                                                                                         |                                       |                   |             |         |                                    |                  |                           |                                   |             |                             |             |                |                           |                               |              |  |
| Reactant (Limiting Reactant First)                                                         | Mass (g)    | MW                                                                                                                                                                                      | Mol                                   | Catalyst          | Mass (g)    | Reagent | Mass (g)                           | Reaction solvent | Volume (cm <sup>3</sup> ) | Density (g ml <sup>-1</sup> )     | Mass (g)    | Work up chemical            | Mass (g)    | Workup solvent | Volume (cm <sup>3</sup> ) | Density (g ml <sup>-1</sup> ) | Mass (g)     |  |
| 2-oxindole                                                                                 | 1.33        | 133.15                                                                                                                                                                                  | 0.01                                  | FeCl <sub>2</sub> | 0.06        |         |                                    |                  |                           |                                   | 0.00        |                             |             | Ethyl acetate  | 25.00                     | 0.90                          | 22.55        |  |
| Cyclohexanol                                                                               | 4.01        | 100.15                                                                                                                                                                                  | 0.04                                  | 1,10-Phen         | 0.18        |         |                                    |                  |                           |                                   |             |                             |             |                |                           |                               |              |  |
| NaOtBu                                                                                     | 1.41        | 96.10                                                                                                                                                                                   | 0.01                                  |                   |             |         |                                    |                  |                           |                                   | 0.00        |                             |             |                |                           |                               | 0.00         |  |
| <b>Total</b>                                                                               | <b>6.75</b> | <b>329.40</b>                                                                                                                                                                           |                                       |                   | <b>0.24</b> |         | <b>0.00</b>                        |                  |                           |                                   | <b>0.00</b> |                             | <b>0.00</b> |                |                           |                               | <b>22.55</b> |  |
|                                                                                            |             |                                                                                                                                                                                         |                                       |                   |             |         |                                    |                  |                           | Flag                              |             |                             |             |                |                           |                               |              |  |
|                                                                                            |             |                                                                                                                                                                                         |                                       |                   |             |         |                                    |                  |                           | Yield                             | 90.0        | 90.0                        |             |                |                           |                               |              |  |
|                                                                                            |             |                                                                                                                                                                                         |                                       |                   |             |         |                                    |                  |                           | Conversion                        | 100.0       | 100.0                       |             |                |                           |                               |              |  |
|                                                                                            |             |                                                                                                                                                                                         |                                       |                   |             |         |                                    |                  |                           | Selectivity                       | 90.0        | 90.0                        |             |                |                           |                               |              |  |
|                                                                                            |             |                                                                                                                                                                                         |                                       |                   |             |         |                                    |                  |                           | AE                                | 65.4        |                             |             | Product        | 1.937                     | 215.296                       | 0.01         |  |
|                                                                                            |             |                                                                                                                                                                                         |                                       |                   |             |         |                                    |                  |                           | RME                               | 28.7        | OE                          | 43.9        | mass           |                           |                               |              |  |
|                                                                                            |             |                                                                                                                                                                                         |                                       |                   |             |         |                                    |                  |                           | PMI total                         | 15.3        | Unreacted limiting reactant |             | 0.00           |                           |                               |              |  |
|                                                                                            |             |                                                                                                                                                                                         |                                       |                   |             |         |                                    |                  |                           | PMI Reaction                      | 3.6         |                             |             |                |                           |                               |              |  |
|                                                                                            |             |                                                                                                                                                                                         |                                       |                   |             |         |                                    |                  |                           | PMI reactants, reagents, catalyst | 3.6         |                             |             |                |                           |                               |              |  |
|                                                                                            |             |                                                                                                                                                                                         |                                       |                   |             |         |                                    |                  |                           | PMI reaction solvents             | 0.0         |                             |             |                |                           |                               |              |  |
|                                                                                            |             |                                                                                                                                                                                         |                                       |                   |             |         |                                    |                  |                           | PMI Workup                        | 11.6        |                             |             |                |                           |                               |              |  |
|                                                                                            |             |                                                                                                                                                                                         |                                       |                   |             |         |                                    |                  |                           | PMI Workup chemical               | 0.0         |                             |             |                |                           |                               |              |  |
|                                                                                            |             |                                                                                                                                                                                         |                                       |                   |             |         |                                    |                  |                           | PMI workup solvents               | 11.6        |                             |             |                |                           |                               |              |  |
|                                                                                            |             |                                                                                                                                                                                         |                                       |                   |             |         |                                    |                  |                           | List solvents below               |             |                             |             |                |                           |                               |              |  |
| Preferred solvents                                                                         |             | water, EtOH, nBuOH, AcOipr, AcOnBu, PhOMe, MeOH, tBuOH, BnOH, ethylene glycol, acetone, MEK, MIBK, AcOEt, sulfolane                                                                     |                                       |                   |             | neat    |                                    |                  |                           |                                   |             |                             |             |                |                           |                               |              |  |
| Problematic solvents: (acceptable only if substitution does not offer advantages)          |             | DMSO, cyclohexanone, DMPU, AcOH, Ac <sub>2</sub> O, Acetonitrile, AcOMe, THF, heptane, Me-cyclohexane, toluene, xylene, MTBE, cyclohexane, chlorobenzene, formic acid, pyridine, Me-THF |                                       |                   |             | none    |                                    |                  |                           |                                   |             |                             |             |                |                           |                               |              |  |
| Hazardous solvents: These solvents have significant health and/or safety concerns.         |             | dioxane, pentane, TEA, diisopropyl ether, DME, DCM, DMF, DMA, NMP, methoxyethanol, hexane                                                                                               |                                       |                   |             | none    |                                    |                  |                           |                                   |             |                             |             |                |                           |                               |              |  |
| Highly hazardous solvents: The solvents which are agreed not to be used, even in screening |             | Et <sub>2</sub> O, Benzene, CCl <sub>4</sub> , chloroform, DCE, nitromethane, CS <sub>2</sub> , HMPA                                                                                    |                                       |                   |             | none    |                                    |                  |                           |                                   |             |                             |             |                |                           |                               |              |  |
| Catalyst/enzyme (First Pass)                                                               |             |                                                                                                                                                                                         | Tick                                  |                   | Tick        |         |                                    |                  |                           |                                   |             |                             |             |                |                           |                               |              |  |
| Catalyst or enzyme used, or reaction takes place                                           |             |                                                                                                                                                                                         | Green Flag                            |                   | X           |         | Facile recovery of catalyst/enzyme |                  | Green Flag                |                                   |             |                             |             |                |                           |                               |              |  |
| Use of stoichiometric quantities of reagents                                               |             |                                                                                                                                                                                         | Amber Flag                            |                   |             |         | catalyst/enzyme not recovered      |                  | Amber Flag                |                                   | X           |                             |             |                |                           |                               |              |  |
| Use of reagents in excess                                                                  |             |                                                                                                                                                                                         | Red Flag                              |                   |             |         |                                    |                  |                           |                                   |             |                             |             |                |                           |                               |              |  |



| Critical elements |             |              |
|-------------------|-------------|--------------|
| Supply remaining  | Flag colour | Note element |
| 5-50 years        | Red Flag    |              |
| 50-500 years      | Amber Flag  |              |
| +500 years        | Green Flag  | Fe           |

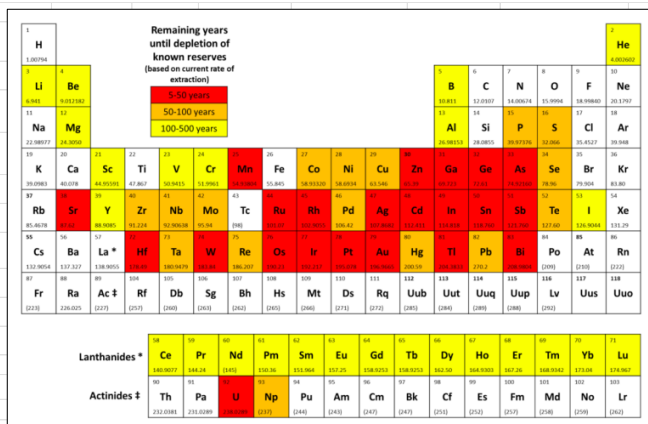

| Energy (First Pass)                          | Tick         |
|----------------------------------------------|--------------|
| Reaction run between 0 to 70°C               | Green Flag   |
| Reaction run between -20 to 0 or 70 to 140°C | Amber Flag X |
| Reaction run below -20 or above 140°C        | Red Flag     |

|                                                          |              |
|----------------------------------------------------------|--------------|
| Reaction run at reflux                                   | Red Flag     |
| Reaction run 5°C or more below the solvent boiling point | Green Flag X |

| Batch/flow | Tick         |
|------------|--------------|
| Flow       | Green Flag   |
| Batch      | Amber Flag X |

| Work Up                                                                                                                                  | List                       |
|------------------------------------------------------------------------------------------------------------------------------------------|----------------------------|
| quenching<br>filtration<br>centrifugation<br>crystallisation                                                                             | Green Flag                 |
| Low temperature distillation/evaporation/<br>sublimation (< 140 °C at atmospheric<br>solvent exchange, quenching into aqueous<br>solvent | Amber Flag                 |
| chromatography/ion exchange<br>high temperature<br>multiple recrystallisation                                                            | Red Flag<br>Chromatography |

| Health & safety            | List substances and H-codes  | List substances and H-codes                    | List substances and H-codes                                |
|----------------------------|------------------------------|------------------------------------------------|------------------------------------------------------------|
| Highly explosive           | Red Flag                     | Amber Flag                                     | Green Flag                                                 |
| Explosive thermal runaway  | H200, H201, H202, H203       | H205, H220, H224                               | If no red or amber flagged H codes present then green flag |
| Toxic                      | H230, H240, H250             | H241                                           |                                                            |
| Long Term toxicity         | H300, H310, H330             | H301, H311, H331, H341, H351, H361, H371, H373 |                                                            |
| Environmental implications | H340, H350, H360, H370, H372 | H401, H412                                     |                                                            |
|                            | H400, H410, H411, H420       |                                                |                                                            |

| Use of chemicals of environmental concern                                            | List substances of very high concern |
|--------------------------------------------------------------------------------------|--------------------------------------|
| Chemical identified as Substances of Very High Concern by ChemSec which are utilised | Red Flag<br>None                     |

**Table S15. Method C (toluene, [Co] 10 mol%, KOH 2 eq, 150 °C, 16 h): First Pass CHEM21 green metrics toolkit**

| Supplementary Information: Appendix 2                                                             |             |                                                                                                                                                                                         |            | Summary of First Pass Metrics Toolkit |             |                                    |             |                  |                           |                                   |             |                  |             |                             |                           |                               |              |
|---------------------------------------------------------------------------------------------------|-------------|-----------------------------------------------------------------------------------------------------------------------------------------------------------------------------------------|------------|---------------------------------------|-------------|------------------------------------|-------------|------------------|---------------------------|-----------------------------------|-------------|------------------|-------------|-----------------------------|---------------------------|-------------------------------|--------------|
| Yield, AE, RME, MI/PMI and OE                                                                     |             |                                                                                                                                                                                         |            |                                       |             |                                    |             |                  |                           |                                   |             |                  |             |                             |                           |                               |              |
| Reactant (Limiting Reactant First)                                                                | Mass (g)    | MW                                                                                                                                                                                      | Mol        | Catalyst                              | Mass (g)    | Reagent                            | Mass (g)    | Reaction solvent | Volume (cm <sup>3</sup> ) | Density (g ml <sup>-1</sup> )     | Mass (g)    | Work up chemical | Mass (g)    | Workup solvent              | Volume (cm <sup>3</sup> ) | Density (g ml <sup>-1</sup> ) | Mass (g)     |
| 2-oxindole                                                                                        | 1.33        | 133.15                                                                                                                                                                                  | 0.01       | [Co]                                  | 0.48        |                                    |             | Toluene          | 10.00                     | 0.87                              | 8.67        |                  |             | Ethyl acetate               | 20.00                     | 0.90                          | 18.04        |
| Cyclohexanol                                                                                      | 2.00        | 100.15                                                                                                                                                                                  | 0.02       |                                       |             |                                    |             |                  |                           |                                   |             |                  |             |                             |                           |                               |              |
| KOH                                                                                               | 1.12        | 46.10                                                                                                                                                                                   | 0.02       |                                       |             |                                    |             |                  |                           |                                   | 0.00        |                  |             |                             |                           |                               | 0.00         |
| <b>Total</b>                                                                                      | <b>4.46</b> | <b>279.40</b>                                                                                                                                                                           |            |                                       | <b>0.48</b> |                                    | <b>0.00</b> |                  |                           |                                   | <b>8.67</b> |                  | <b>0.00</b> |                             |                           |                               | <b>18.04</b> |
|                                                                                                   |             |                                                                                                                                                                                         |            |                                       |             |                                    |             |                  |                           | Flag                              |             |                  |             |                             |                           |                               |              |
|                                                                                                   |             |                                                                                                                                                                                         |            |                                       |             |                                    |             |                  |                           | Yield                             | 91.0        | ●                | 91.0        |                             |                           |                               |              |
|                                                                                                   |             |                                                                                                                                                                                         |            |                                       |             |                                    |             |                  |                           | Conversion                        | 100.0       | ●                | 100.0       |                             |                           |                               |              |
|                                                                                                   |             |                                                                                                                                                                                         |            |                                       |             |                                    |             |                  |                           | Selectivity                       | 91.0        | ●                | 91.0        |                             |                           |                               |              |
|                                                                                                   |             |                                                                                                                                                                                         |            |                                       |             |                                    |             |                  |                           | AE                                | 77.1        |                  |             | Product                     | Mass                      | MW                            | Mol          |
|                                                                                                   |             |                                                                                                                                                                                         |            |                                       |             |                                    |             |                  |                           | RME                               | 44.0        | OE               | 57.1        |                             | 1.959                     | 215.296                       | 0.01         |
|                                                                                                   |             |                                                                                                                                                                                         |            |                                       |             |                                    |             |                  |                           | PMI total                         | 16.2        |                  |             | Unreacted limiting reactant | mass                      |                               |              |
|                                                                                                   |             |                                                                                                                                                                                         |            |                                       |             |                                    |             |                  |                           | PMI Reaction                      | 6.9         |                  |             |                             | 0.00                      |                               |              |
|                                                                                                   |             |                                                                                                                                                                                         |            |                                       |             |                                    |             |                  |                           | PMI reactants, reagents, catalyst | 2.5         |                  |             |                             |                           |                               |              |
|                                                                                                   |             |                                                                                                                                                                                         |            |                                       |             |                                    |             |                  |                           | PMI reaction solvents             | 4.4         |                  |             |                             |                           |                               |              |
|                                                                                                   |             |                                                                                                                                                                                         |            |                                       |             |                                    |             |                  |                           | PMI Workup                        | 9.2         |                  |             |                             |                           |                               |              |
|                                                                                                   |             |                                                                                                                                                                                         |            |                                       |             |                                    |             |                  |                           | PMI Workup chemical               | 0.0         |                  |             |                             |                           |                               |              |
|                                                                                                   |             |                                                                                                                                                                                         |            |                                       |             |                                    |             |                  |                           | PMI workup solvents               | 9.2         |                  |             |                             |                           |                               |              |
|                                                                                                   |             |                                                                                                                                                                                         |            |                                       |             |                                    |             |                  |                           |                                   |             |                  |             |                             |                           |                               |              |
| <b>Solvents (First Pass)</b>                                                                      |             |                                                                                                                                                                                         |            |                                       |             |                                    |             |                  |                           | <b>List solvents below</b>        |             |                  |             |                             |                           |                               |              |
| <b>Preferred solvents</b>                                                                         |             | water, EtOH, nBuOH, AcOipr, AcOnBu, PhOMe, MeOH, tBuOH, BnOH, ethylene glycol, acetone, MEK, MIBK, AcOEt, sulfolane                                                                     |            |                                       |             | none                               |             |                  |                           |                                   |             |                  |             |                             |                           |                               |              |
| <b>Problematic solvents:</b> (acceptable only if substitution does not offer advantages)          |             | DMSO, cyclohexanone, DMPU, AcOH, Ac <sub>2</sub> O, Acetonitrile, AcOMe, THF, heptane, Me-cyclohexane, toluene, xylene, MTBE, cyclohexane, chlorobenzene, formic acid, pyridine, Me-THF |            |                                       |             | Toluene                            |             |                  |                           |                                   |             |                  |             |                             |                           |                               |              |
| <b>Hazardous solvents:</b> These solvents have significant health and/or safety concerns.         |             | dioxane, pentane, TEA, diisopropyl ether, DME, DCM, DMF, DMA, NMP, methoxyethanol, hexane                                                                                               |            |                                       |             | none                               |             |                  |                           |                                   |             |                  |             |                             |                           |                               |              |
| <b>Highly hazardous solvents:</b> The solvents which are agreed not to be used, even in screening |             | Et <sub>2</sub> O, Benzene, CCl <sub>4</sub> , chloroform, DCE, nitromethane, CS <sub>2</sub> , HMPA                                                                                    |            |                                       |             | none                               |             |                  |                           |                                   |             |                  |             |                             |                           |                               |              |
| <b>Catalyst/enzyme (First Pass)</b>                                                               |             |                                                                                                                                                                                         |            |                                       |             |                                    |             |                  |                           | Tick                              |             | Tick             |             |                             |                           |                               |              |
| Catalyst or enzyme used, or reaction takes place                                                  |             |                                                                                                                                                                                         | Green Flag | X                                     |             | Facile recovery of catalyst/enzyme |             |                  | Green Flag                |                                   |             |                  |             |                             |                           |                               |              |
| Use of stoichiometric quantities of reagents                                                      |             |                                                                                                                                                                                         | Amber Flag |                                       |             | catalyst/enzyme not recovered      |             |                  | Amber Flag                |                                   | X           |                  |             |                             |                           |                               |              |
| Use of reagents in excess                                                                         |             |                                                                                                                                                                                         | Red Flag   |                                       |             |                                    |             |                  |                           |                                   |             |                  |             |                             |                           |                               |              |

| Critical elements |             |              |
|-------------------|-------------|--------------|
| Supply remaining  | Flag colour | Note element |
| 5-50 years        | Red Flag    |              |
| 50-500 years      | Amber Flag  | Co           |
| +500 years        | Green Flag  |              |

| Remaining years until depletion of known reserves (based on current rate of extraction)                                                          |          |          |          |          |          |          |          |          |         |          |          |          |          |         |         |         |         |          |         |
|--------------------------------------------------------------------------------------------------------------------------------------------------|----------|----------|----------|----------|----------|----------|----------|----------|---------|----------|----------|----------|----------|---------|---------|---------|---------|----------|---------|
| <div style="display: flex; justify-content: space-between;"> <span>5-50 years</span> <span>50-100 years</span> <span>100-500 years</span> </div> |          |          |          |          |          |          |          |          |         |          |          |          |          |         |         |         |         |          |         |
| 1                                                                                                                                                | 2        | 3        | 4        | 5        | 6        | 7        | 8        | 9        | 10      | 11       | 12       | 13       | 14       | 15      | 16      | 17      | 18      | 19       | 20      |
| H                                                                                                                                                | Li       | Be       | B        | C        | N        | O        | F        | Ne       | Na      | Mg       | Al       | Si       | P        | S       | Cl      | Ar      | K       | Ca       | Sc      |
| 1.00794                                                                                                                                          | 6.941    | 9.01218  | 10.811   | 12.0107  | 14.0064  | 15.9994  | 18.9984  | 20.1797  | 22.9897 | 24.305   | 26.9815  | 28.0855  | 30.9713  | 32.059  | 35.4527 | 39.948  | 39.0983 | 40.078   | 44.9559 |
| 21                                                                                                                                               | 22       | 23       | 24       | 25       | 26       | 27       | 28       | 29       | 30      | 31       | 32       | 33       | 34       | 35      | 36      | 37      | 38      | 39       | 40      |
| Na                                                                                                                                               | Mg       | Al       | Si       | P        | S        | Cl       | Ar       | K        | Ca      | Sc       | Ti       | V        | Cr       | Mn      | Fe      | Co      | Ni      | Cu       | Zn      |
| 22.9897                                                                                                                                          | 24.305   | 26.9815  | 28.0855  | 30.9713  | 32.059   | 35.4527  | 39.948   | 39.0983  | 40.078  | 44.9559  | 47.867   | 50.9415  | 51.9961  | 54.938  | 55.845  | 58.9332 | 58.6934 | 63.546   | 65.38   |
| 41                                                                                                                                               | 42       | 43       | 44       | 45       | 46       | 47       | 48       | 49       | 50      | 51       | 52       | 53       | 54       | 55      | 56      | 57      | 58      | 59       | 60      |
| K                                                                                                                                                | Ca       | Sc       | Ti       | V        | Cr       | Mn       | Fe       | Co       | Ni      | Cu       | Zn       | Ga       | Ge       | As      | Se      | Br      | Kr      | Rb       | Sr      |
| 39.0983                                                                                                                                          | 40.078   | 44.9559  | 47.867   | 50.9415  | 51.9961  | 54.938   | 55.845   | 58.9332  | 58.6934 | 63.546   | 65.38    | 69.723   | 72.630   | 74.9216 | 78.96   | 79.904  | 83.80   | 85.468   | 87.62   |
| 61                                                                                                                                               | 62       | 63       | 64       | 65       | 66       | 67       | 68       | 69       | 70      | 71       | 72       | 73       | 74       | 75      | 76      | 77      | 78      | 79       | 80      |
| Na                                                                                                                                               | Mg       | Al       | Si       | P        | S        | Cl       | Ar       | K        | Ca      | Sc       | Ti       | V        | Cr       | Mn      | Fe      | Co      | Ni      | Cu       | Zn      |
| 22.9897                                                                                                                                          | 24.305   | 26.9815  | 28.0855  | 30.9713  | 32.059   | 35.4527  | 39.948   | 39.0983  | 40.078  | 44.9559  | 47.867   | 50.9415  | 51.9961  | 54.938  | 55.845  | 58.9332 | 58.6934 | 63.546   | 65.38   |
| 81                                                                                                                                               | 82       | 83       | 84       | 85       | 86       | 87       | 88       | 89       | 90      | 91       | 92       | 93       | 94       | 95      | 96      | 97      | 98      | 99       | 100     |
| Rb                                                                                                                                               | Sr       | Y        | Zr       | Nb       | Mo       | Tc       | Ru       | Rh       | Pd      | Ag       | Cd       | In       | Sn       | Sb      | Te      | I       | Xe      | Cs       | Ba      |
| 85.468                                                                                                                                           | 87.62    | 88.906   | 91.224   | 92.9064  | 95.94    | 98.9062  | 101.07   | 102.9055 | 106.42  | 107.8682 | 112.411  | 114.917  | 118.710  | 121.757 | 127.60  | 126.904 | 131.29  | 132.9054 | 137.327 |
| 101                                                                                                                                              | 102      | 103      | 104      | 105      | 106      | 107      | 108      | 109      | 110     | 111      | 112      | 113      | 114      | 115     | 116     | 117     | 118     | 119      | 120     |
| Cs                                                                                                                                               | Ba       | La*      | Hf       | Ta       | W        | Re       | Os       | Ir       | Pt      | Au       | Hg       | Tl       | Pb       | Bi      | Po      | At      | Rn      | Fr       | Ra      |
| 132.9054                                                                                                                                         | 137.327  | 138.905  | 178.49   | 180.947  | 186.207  | 186.207  | 190.23   | 192.225  | 197.00  | 198.906  | 200.59   | 204.38   | 208.98   | 214.969 | 210     | 210     | 222     | 223      | 226     |
| 121                                                                                                                                              | 122      | 123      | 124      | 125      | 126      | 127      | 128      | 129      | 130     | 131      | 132      | 133      | 134      | 135     | 136     | 137     | 138     | 139      | 140     |
| Fr                                                                                                                                               | Ra       | Ac ‡     | Rf       | Db       | Sg       | Bh       | Hs       | Mt       | Ds      | Rg       | Uub      | Uut      | Uuq      | Uup     | Lv      | Uus     | Uuo     |          |         |
| 223                                                                                                                                              | 226      | 227      | 261      | 262      | 263      | 264      | 265      | 266      | 267     | 268      | 269      | 270      | 271      | 272     | 273     | 274     | 275     |          |         |
| Lanthanides*                                                                                                                                     |          |          |          |          |          |          |          |          |         |          |          |          |          |         |         |         |         |          |         |
| 57                                                                                                                                               | 58       | 59       | 60       | 61       | 62       | 63       | 64       | 65       | 66      | 67       | 68       | 69       | 70       | 71      | 72      | 73      | 74      | 75       | 76      |
| Ce                                                                                                                                               | Pr       | Nd       | Pm       | Sm       | Eu       | Gd       | Tb       | Dy       | Ho      | Er       | Tm       | Yb       | Lu       |         |         |         |         |          |         |
| 140.9077                                                                                                                                         | 140.9077 | 144.24   | 144.913  | 150.36   | 151.964  | 157.25   | 158.925  | 162.50   | 164.930 | 167.26   | 168.934  | 173.04   | 174.967  |         |         |         |         |          |         |
| 103                                                                                                                                              | 104      | 105      | 106      | 107      | 108      | 109      | 110      | 111      | 112     | 113      | 114      | 115      | 116      | 117     | 118     | 119     | 120     | 121      | 122     |
| Th                                                                                                                                               | Pa       | U        | Np       | Pu       | Am       | Cm       | Bk       | Cf       | Es      | Fm       | Md       | No       | Lr       |         |         |         |         |          |         |
| 232.0377                                                                                                                                         | 231.0369 | 238.0289 | 237.0481 | 244.0642 | 244.0642 | 247.0713 | 247.0713 | 251.1088 | 252.083 | 257.1037 | 258.1052 | 262.1088 | 263.1088 |         |         |         |         |          |         |

| Energy (First Pass)                          | Tick         |
|----------------------------------------------|--------------|
| Reaction run between 0 to 70°C               | Green Flag   |
| Reaction run between -20 to 0 or 70 to 140°C | Amber Flag X |
| Reaction run below -20 or above 140°C        | Red Flag     |

| Reaction run at reflux                                   | Red Flag   | Tick |
|----------------------------------------------------------|------------|------|
| Reaction run 5°C or more below the solvent boiling point | Green Flag | X    |

| Batch/flow | Tick         |
|------------|--------------|
| Flow       | Green Flag   |
| Batch      | Amber Flag X |

| Work Up                                                                                                                                  | List                       |
|------------------------------------------------------------------------------------------------------------------------------------------|----------------------------|
| quenching<br>filtration                                                                                                                  | Green Flag                 |
| centrifugation<br>crystallisation                                                                                                        | Green Flag                 |
| Low temperature distillation/evaporation/<br>sublimation (< 140 °C at atmospheric<br>solvent exchange, quenching into aqueous<br>solvent | Amber Flag                 |
| chromatography/ion exchange<br>high temperature<br>multiple recrystallisation                                                            | Red Flag<br>Chromatography |

| Health & safety            | List substances and H-codes | List substances and H-codes                    | List substances and H-codes                                                                                                                                |
|----------------------------|-----------------------------|------------------------------------------------|------------------------------------------------------------------------------------------------------------------------------------------------------------|
| Highly explosive           | Red Flag                    | Amber Flag                                     | Green Flag                                                                                                                                                 |
| Explosive thermal runaway  | H200, H201, H202, H203      | H205, H220, H224                               | If no red or amber flagged H codes present then green flag                                                                                                 |
| Toxic                      | H230, H240, H250            | H241                                           | None                                                                                                                                                       |
| Long Term toxicity         | H300, H310, H330            | H301, H311, H331, H340, H350, H360, H370, H372 | Cyclohexanol: H412                                                                                                                                         |
| Environmental implications | H400, H410, H411, H420      | H401, H412                                     | 2-oxindole: H302, H312, H332,; Cyclohexanol: H302, H312, H315; H332, H319, H335 KOH: H290, H302, H314, Ethylacetate: H225, H319, H336. Anisole: H226, H336 |

| Use of chemicals of environmental concern                                            | List substances of very high concern |
|--------------------------------------------------------------------------------------|--------------------------------------|
| Chemical identified as Substances of Very High Concern by ChemSec which are utilised | Red Flag<br>None                     |



| Critical elements |             |              |
|-------------------|-------------|--------------|
| Supply remaining  | Flag colour | Note element |
| 5-50 years        | Red Flag    |              |
| 50-500 years      | Amber Flag  |              |
| +500 years        | Green Flag  | Fe           |

| Remaining years until depletion of known reserves (based on current rate of extraction)                                                         |    |     |    |    |    |    |    |    |     |     |     |     |     |     |     |     |     |     |
|-------------------------------------------------------------------------------------------------------------------------------------------------|----|-----|----|----|----|----|----|----|-----|-----|-----|-----|-----|-----|-----|-----|-----|-----|
| <div style="display: flex; justify-content: space-around;"> <span>5-50 years</span> <span>50-100 years</span> <span>100-500 years</span> </div> |    |     |    |    |    |    |    |    |     |     |     |     |     |     |     |     |     |     |
| 1                                                                                                                                               | 2  | 3   | 4  | 5  | 6  | 7  | 8  | 9  | 10  | 11  | 12  | 13  | 14  | 15  | 16  | 17  | 18  | 19  |
| H                                                                                                                                               | Li | Be  | B  | C  | N  | O  | F  | Ne | Na  | Mg  | Al  | Si  | P   | S   | Cl  | Ar  | K   | Ca  |
| 19                                                                                                                                              | 20 | 21  | 22 | 23 | 24 | 25 | 26 | 27 | 28  | 29  | 30  | 31  | 32  | 33  | 34  | 35  | 36  | 37  |
| K                                                                                                                                               | Ca | Sc  | Ti | V  | Cr | Mn | Fe | Co | Ni  | Cu  | Zn  | Ga  | Ge  | As  | Se  | Br  | Kr  | Rb  |
| 37                                                                                                                                              | 38 | 39  | 40 | 41 | 42 | 43 | 44 | 45 | 46  | 47  | 48  | 49  | 50  | 51  | 52  | 53  | 54  | 55  |
| Rb                                                                                                                                              | Sr | Y   | Zr | Nb | Mo | Tc | Ru | Rh | Pd  | Ag  | Cd  | In  | Sn  | Sb  | Te  | I   | Xe  | Cs  |
| 55                                                                                                                                              | 56 | 57  | 58 | 59 | 60 | 61 | 62 | 63 | 64  | 65  | 66  | 67  | 68  | 69  | 70  | 71  | 72  | 73  |
| Cs                                                                                                                                              | Ba | La* | Hf | Ta | W  | Re | Os | Ir | Pt  | Au  | Hg  | Tl  | Pb  | Bi  | Po  | At  | Rn  | Fr  |
| 73                                                                                                                                              | 74 | 75  | 76 | 77 | 78 | 79 | 80 | 81 | 82  | 83  | 84  | 85  | 86  | 87  | 88  | 89  | 90  | 91  |
| Fr                                                                                                                                              | Ra | Ac‡ | Rf | Db | Sg | Bh | Hs | Mt | Ds  | Rg  | Uub | Uut | Uuq | Uup | Lv  | Uus | Uuo |     |
| 91                                                                                                                                              | 92 | 93  | 94 | 95 | 96 | 97 | 98 | 99 | 100 | 101 | 102 | 103 | 104 | 105 | 106 | 107 | 108 | 109 |
| Lanthanides*                                                                                                                                    |    |     |    |    |    |    |    |    |     |     |     |     |     |     |     |     |     |     |
| 58                                                                                                                                              | 59 | 60  | 61 | 62 | 63 | 64 | 65 | 66 | 67  | 68  | 69  | 70  | 71  | 72  | 73  | 74  | 75  | 76  |
| Ce                                                                                                                                              | Pr | Nd  | Pm | Sm | Eu | Gd | Tb | Dy | Ho  | Er  | Tm  | Yb  | Lu  |     |     |     |     |     |
| 74                                                                                                                                              | 75 | 76  | 77 | 78 | 79 | 80 | 81 | 82 | 83  | 84  | 85  | 86  | 87  | 88  | 89  | 90  | 91  | 92  |
| Actinides‡                                                                                                                                      |    |     |    |    |    |    |    |    |     |     |     |     |     |     |     |     |     |     |
| 88                                                                                                                                              | 89 | 90  | 91 | 92 | 93 | 94 | 95 | 96 | 97  | 98  | 99  | 100 | 101 | 102 | 103 | 104 | 105 | 106 |
| Th                                                                                                                                              | Pa | U   | Np | Pu | Am | Cm | Bk | Cf | Es  | Fm  | Md  | No  | Lr  |     |     |     |     |     |

| Energy (First Pass)                          |            | Tick |
|----------------------------------------------|------------|------|
| Reaction run between 0 to 70°C               | Green Flag |      |
| Reaction run between -20 to 0 or 70 to 140°C | Amber Flag | X    |
| Reaction run below -20 or above 140°C        | Red Flag   |      |

| Reaction run at reflux                                   |            | Red Flag | Tick |
|----------------------------------------------------------|------------|----------|------|
| Reaction run 5°C or more below the solvent boiling point | Green Flag |          | X    |

| Batch/flow |            | Tick |
|------------|------------|------|
| Flow       | Green Flag |      |
| Batch      | Amber Flag | X    |

| Work Up                                                                        |            | Green Flag | List           |
|--------------------------------------------------------------------------------|------------|------------|----------------|
| quenching                                                                      |            |            |                |
| filtration                                                                     |            |            |                |
| centrifugation                                                                 |            |            |                |
| crystallisation                                                                |            |            |                |
| Low temperature distillation/evaporation/sublimation (< 140 °C at atmospheric) |            |            |                |
| solvent exchange, quenching into aqueous solvent                               | Amber Flag |            |                |
| chromatography/ion exchange                                                    |            | Red Flag   | Chromatography |
| high temperature                                                               |            |            |                |
| multiple recrystallisation                                                     |            |            |                |

| Health & safety            |                                          |                                            | List substances and H-codes                                              | List substances and H-codes | List substances and H-codes      |                                                                                                                                                                                                                                     |
|----------------------------|------------------------------------------|--------------------------------------------|--------------------------------------------------------------------------|-----------------------------|----------------------------------|-------------------------------------------------------------------------------------------------------------------------------------------------------------------------------------------------------------------------------------|
| Highly explosive           | Red Flag<br>H200, H201, H202, H203       | Amber Flag<br>H205, H220, H224             | Green Flag<br>If no red or amber flagged H codes present then green flag | 1,10-Phenanthroline: H410   | Cyclohexanol: H412; NaOtBu: H351 | 2-oxindole: H302, H312, H332,; Cyclohexanol: H302, H312, H315; H332, H319, H335 NaOtBu: H225, H251, H314, H335, H336, Ethylacetate: H225, H319, H336. Anisole: H226, H336; FeCl2: H290, H302, H315, H318; 1,10-Phenanthroline: H301 |
| Explosive thermal runaway  | Red Flag<br>H230, H240, H250             | Amber Flag<br>H241                         |                                                                          |                             |                                  |                                                                                                                                                                                                                                     |
| Toxic                      | Red Flag<br>H300, H310, H330             | Amber Flag<br>H301, H311, H331,            |                                                                          |                             |                                  |                                                                                                                                                                                                                                     |
| Long Term toxicity         | Red Flag<br>H340, H350, H360, H370, H372 | Amber Flag<br>H341, H351, H361, H371, H373 |                                                                          |                             |                                  |                                                                                                                                                                                                                                     |
| Environmental implications | Red Flag<br>H400, H410, H411, H420       | Amber Flag<br>H401, H412                   |                                                                          |                             |                                  |                                                                                                                                                                                                                                     |

| Use of chemicals of environmental concern                                            |          | List substances of very high concern |
|--------------------------------------------------------------------------------------|----------|--------------------------------------|
| Chemical identified as Substances of Very High Concern by ChemSec which are utilised | Red Flag | None                                 |

## References:

1. P. Chakraborty, N. Garg, E. Manoury, R. Poli and B. Sundararaju, *ACS Catal.* 2020, **10**, 8023– 8031.
2. J. Rana, P. Nagarasu, M. Subaramanian, A. Mondal, V. Madhu and E. Balaraman, *Organometallics* 2021, **40**, 627– 634.
3. A. Bera, A. Ghosh and D. Banerjee, *J. Org. Chem.* 2023, **88**(11), 7162-7171.
4. S. M. Yang , P. Karanam , M. Wang , Y. J. Jang , Y. S. Yeh , P. Y. Tseng , M. R. Ganapuram , Y. C. Liou and W. W. Lin , *Chem. Commun.*, 2019, **55**, 1398 – 1401.
5. G. M. Sheldrick, *Acta Crystallogr., Sect. C: Struct. Chem.*, 2015, **71**, 3–8.
6. O. V. Dolomanov, L. J. Bourhis, R. J. Gildea, J. A. Howard and H. Puschmann, *J. Appl. Crystallogr.*, 2009, **42**, 339–341.
7. G. M. Sheldrick, *Acta Crystallogr., Sect. A: Found. Crystallogr.*, 2008, **64**, 112 – 122.
